# Supplementary material for: HEB collaborates with TCR signaling to upregulate Id3 and enable γδT17 cell maturation in the fetal thymus
Source: bioRxiv preprint, doi:10.1101/2025.06.08.658490, version 4 (2026-01-24)
Supplement: Figure 4 - figure supplement 1 [file 658490_file03.xlsx]

## Sheet: ALL
Figure 4 - figure supplement 1. Differentially expressed genes between WT and HEB cKO gdT17 precursor populations from Figure 4A
	p_val	avg_log2FC	pct.1	pct.2	p_val_adj
Gclm	2.63912e-79	-1.08659	1	1	3.57944e-75
Rps7	6.85546e-73	0.499054	1	1	9.29806e-69
Mzb1	2.73805e-65	2.86678	0.734	0.214	3.71361e-61
Lgals1	4.20659e-64	-1.259	0.96	0.995	5.7054e-60
Endou	7.78553e-63	1.93528	0.873	0.466	1.05595e-58
Id3	2.48201e-60	2.58043	0.702	0.157	3.36635e-56
Rpl13a	6.86853e-60	0.915979	1	0.974	9.31578e-56
Ighm	2.31026e-55	1.76788	0.873	0.43	3.1334e-51
Sdc4	2.36476e-53	3.42462	0.514	0.076	3.20733e-49
Ilvbl	1.79558e-46	1.64514	0.85	0.504	2.43535e-42
Tmsb4x	6.42829e-46	-0.629583	1	1	8.71869e-42
Pdlim4	2.12063e-44	1.87786	0.72	0.301	2.87622e-40
Il21r	2.22568e-44	1.69699	0.775	0.358	3.01869e-40
Sox13	5.39246e-42	1.27503	0.908	0.646	7.3138e-38
Uba52	3.2283e-41	0.550586	1	1	4.37854e-37
Ramp1	4.95385e-41	1.00868	0.98	0.798	6.7189e-37
Rgs10	4.89704e-40	1.27216	0.919	0.667	6.64185e-36
Epcam	1.85114e-39	2.32061	0.535	0.143	2.5107e-35
St6gal1	4.52831e-39	1.56436	0.754	0.373	6.14175e-35
Vim	2.1459e-38	-1.80824	0.624	0.855	2.91048e-34
Abi3	3.85821e-38	0.994793	0.954	0.77	5.23288e-34
Trdv4	2.23342e-37	-1.09206	0.48	0.908	3.02918e-33
Blk	2.47685e-35	0.774915	0.983	0.872	3.35935e-31
Ccr2	2.9357e-35	-1.94171	0.251	0.653	3.98169e-31
Tsc22d4	1.01821e-34	0.69492	0.994	0.974	1.381e-30
Ampd1	7.74111e-34	3.01288	0.376	0.064	1.04993e-29
Aqp11	2.73712e-33	2.06472	0.642	0.29	3.71236e-29
Ccr9	3.65364e-32	0.769617	0.997	0.978	4.95544e-28
Ifngr1	6.28117e-32	0.613787	1	0.99	8.51915e-28
Gapdh	1.55855e-31	0.512053	1	1	2.11386e-27
Gpr25	2.60892e-31	1.29455	0.792	0.465	3.53848e-27
Prrt1	2.77713e-31	1.27072	0.795	0.497	3.76662e-27
Eef2	4.35131e-31	0.409956	1	1	5.90168e-27
Rps2	4.49665e-31	-0.385621	1	1	6.09881e-27
Tcrg-V4	4.75163e-30	1.74498	0.613	0.24	6.44464e-26
Tcf12	1.0302e-29	1.49292	0.694	0.366	1.39726e-25
Etv5	6.60466e-29	1.63617	0.633	0.288	8.95791e-25
Ubc	1.75697e-28	1.01954	0.864	0.589	2.38297e-24
Hint1	1.97976e-28	-0.619696	0.997	1	2.68514e-24
Nrros	2.80781e-28	1.17584	0.803	0.515	3.80824e-24
Rorc	5.75851e-28	0.908302	0.931	0.782	7.81027e-24
Ly6e	7.43864e-28	-0.726834	0.997	1	1.0089e-23
Ms4a4b	9.28876e-28	-3.01876	0.061	0.394	1.25983e-23
Pdcd1	1.08617e-26	1.08192	0.855	0.511	1.47317e-22
Emp3	3.00474e-26	-0.956575	0.688	0.908	4.07533e-22
Atp1b1	4.10743e-26	2.13872	0.419	0.123	5.57091e-22
Lat	2.6791e-25	0.480048	1	1	3.63367e-21
Ms4a6b	3.85612e-25	-3.24072	0.04	0.335	5.23005e-21
Shisa5	5.79369e-25	-1.59071	0.269	0.625	7.85798e-21
Ypel3	8.57853e-25	0.764013	0.971	0.886	1.16351e-20
Parm1	1.08269e-24	4.10034	0.202	0.01	1.46846e-20
Smox	1.38441e-24	0.974899	0.85	0.62	1.87767e-20
Npm1	1.39798e-24	-0.436992	1	1	1.89608e-20
Iqch	1.97282e-24	1.26809	0.725	0.437	2.67573e-20
Tspan13	2.67727e-24	0.867909	0.887	0.651	3.63118e-20
Sla	9.34424e-24	0.82262	0.931	0.807	1.26736e-19
Gata3	1.08796e-23	0.818223	0.942	0.798	1.47561e-19
Mif	1.30756e-23	-0.527495	1	0.998	1.77345e-19
Gpr162	1.83617e-23	4.60077	0.188	0.009	2.4904e-19
Hmga1	2.34984e-23	0.604541	0.983	0.952	3.18709e-19
Gm13652	3.03939e-23	2.20674	0.376	0.107	4.12233e-19
Itgb7	3.70376e-23	-1.30216	0.338	0.663	5.02341e-19
Actb	4.0064e-23	-0.318888	1	1	5.43388e-19
Cd3d	5.59727e-23	0.432399	1	0.998	7.59158e-19
Prdx1	6.36703e-23	-0.586619	1	1	8.63561e-19
Abcb9	8.18752e-23	1.19518	0.688	0.39	1.11047e-18
Myl6	9.79859e-23	-0.403548	1	1	1.32898e-18
Cxcr5	1.07475e-22	2.10536	0.379	0.112	1.45768e-18
Rpl14	1.47785e-22	-0.284167	1	1	2.00441e-18
Atp5g1	2.04193e-22	-0.603908	0.991	0.995	2.76946e-18
Art1	2.64301e-22	1.9215	0.379	0.111	3.58472e-18
Rpl32	2.9805e-22	-0.207902	1	1	4.04246e-18
Gpx1	3.16817e-22	-0.513584	1	0.998	4.29699e-18
Hsp90b1	3.63513e-22	-0.799037	0.977	0.99	4.93032e-18
Psme2	3.77548e-22	-0.626648	0.971	0.995	5.12069e-18
Rpl29	4.81219e-22	0.257551	1	1	6.52677e-18
Rps25	6.26092e-22	-0.423113	1	1	8.49168e-18
Man1a	6.45628e-22	1.6299	0.514	0.223	8.75665e-18
Trdv5	1.37212e-21	1.86416	0.384	0.117	1.86101e-17
Ergic1	1.57558e-21	1.01794	0.754	0.485	2.13696e-17
Cyba	2.08017e-21	-0.567739	0.968	0.991	2.82133e-17
Dck	2.65131e-21	0.976201	0.769	0.53	3.59597e-17
Ppia	2.82081e-21	-0.341508	1	1	3.82587e-17
Slc11a2	6.48504e-21	1.27259	0.627	0.339	8.79566e-17
Rasal3	6.50465e-21	0.774023	0.905	0.762	8.82225e-17
Rps26	6.53156e-21	-0.21288	1	1	8.85875e-17
Tagln2	8.4634e-21	-0.837188	0.754	0.905	1.14789e-16
Cox7b	9.49387e-21	-0.542611	0.96	0.993	1.28765e-16
Ppp1cc	1.57447e-20	0.515649	0.988	0.986	2.13545e-16
Ucp2	2.33932e-20	0.370318	1	1	3.17282e-16
Cd5	3.43904e-20	1.66418	0.419	0.154	4.66437e-16
Calr	3.59337e-20	-0.765605	0.876	0.962	4.87369e-16
Tbxa2r	5.30935e-20	1.37249	0.566	0.282	7.20107e-16
Podnl1	5.46276e-20	1.22584	0.633	0.359	7.40914e-16
Arpp21	5.77626e-20	1.73176	0.457	0.183	7.83435e-16
Chchd2	1.01576e-19	0.388471	1	0.998	1.37767e-15
Rpl22l1	1.50305e-19	-0.404528	1	1	2.03859e-15
Psma2	2.07969e-19	-0.481495	0.974	0.997	2.82068e-15
Fabp5	3.67308e-19	-0.579774	0.809	0.971	4.9818e-15
Trgv2	3.75109e-19	0.947398	0.873	0.667	5.0876e-15
D430041D05Rik	4.11141e-19	2.87055	0.225	0.038	5.5763e-15
Rps27a	4.37867e-19	-0.167887	1	1	5.9388e-15
Syt13	4.46995e-19	2.1749	0.312	0.088	6.06259e-15
Tspo	4.76794e-19	-0.717424	0.847	0.946	6.46675e-15
Heg1	5.49447e-19	1.05755	0.699	0.472	7.45215e-15
Atp8b4	5.75299e-19	-1.43653	0.263	0.546	7.80278e-15
Flna	6.22933e-19	-0.871524	0.5	0.777	8.44884e-15
Cxcr6	6.60457e-19	-1.17795	0.428	0.684	8.95778e-15
Nebl	6.90748e-19	0.636889	0.948	0.782	9.36861e-15
Klc3	7.75609e-19	1.77316	0.361	0.119	1.05196e-14
Notch3	1.29646e-18	1.80692	0.332	0.098	1.7584e-14
Zap70	1.2966e-18	0.650398	0.965	0.921	1.75857e-14
Capn3	1.54577e-18	1.25094	0.633	0.375	2.09653e-14
Pcbp2	1.66409e-18	0.40194	1	0.997	2.25701e-14
Cd6	1.79936e-18	1.26734	0.598	0.337	2.44047e-14
Sh3bgrl3	1.91937e-18	-0.332526	1	1	2.60324e-14
Ano6	1.97759e-18	0.978345	0.72	0.466	2.68221e-14
Pdia3	3.08582e-18	-0.578482	0.986	0.995	4.1853e-14
Rasgrp1	3.39425e-18	0.603004	0.98	0.886	4.60362e-14
Pdia6	3.97985e-18	-0.740531	0.893	0.96	5.39787e-14
Ldha	6.09171e-18	-0.403153	1	1	8.26219e-14
Rps27l	6.87346e-18	-0.52012	0.936	0.984	9.32248e-14
Hdac7	8.56259e-18	0.718208	0.882	0.71	1.16134e-13
Atp5g3	9.41453e-18	-0.346421	1	1	1.27689e-13
Cox5a	9.6197e-18	-0.36966	0.997	1	1.30472e-13
Ptpn7	1.02845e-17	0.660698	0.948	0.888	1.39489e-13
Tmsb10	1.08164e-17	-0.321024	1	1	1.46703e-13
Gm37552	1.41392e-17	1.67209	0.384	0.145	1.9177e-13
Eef1d	1.52569e-17	-0.461391	0.994	1	2.06929e-13
Xlr4b	1.69041e-17	1.01258	0.676	0.439	2.29271e-13
Myb	1.72999e-17	0.7764	0.864	0.693	2.34639e-13
Cox5b	1.89097e-17	-0.403601	0.997	1	2.56472e-13
Psma3	2.26368e-17	-0.548324	0.954	0.978	3.07023e-13
Klf2	2.37612e-17	-1.1613	0.301	0.596	3.22274e-13
Plekhf1	2.41579e-17	1.03884	0.642	0.375	3.27654e-13
Cyb5a	2.88372e-17	0.57938	0.977	0.934	3.91119e-13
Kbtbd11	3.8817e-17	0.761054	0.806	0.596	5.26475e-13
Colq	3.96609e-17	2.0849	0.312	0.098	5.37921e-13
Gimap4	4.28698e-17	-2.09615	0.124	0.377	5.81442e-13
Dgkeos	6.1943e-17	1.43047	0.483	0.23	8.40133e-13
Ndufa13	6.8811e-17	-0.394397	0.991	0.998	9.33283e-13
Cox8a	6.98536e-17	-0.332199	1	1	9.47424e-13
Tmem121	7.32116e-17	1.18689	0.538	0.287	9.9297e-13
Slc35b4	8.82705e-17	1.21523	0.546	0.299	1.19721e-12
Stx6	1.16584e-16	1.01309	0.601	0.337	1.58122e-12
Sla2	1.1821e-16	0.708459	0.855	0.649	1.60328e-12
Cd247	1.33559e-16	0.546918	0.991	0.971	1.81146e-12
Sec61b	1.65823e-16	-0.353799	1	1	2.24905e-12
Ikzf1	1.91247e-16	0.87186	0.734	0.494	2.59388e-12
Hsdl1	1.92881e-16	1.76071	0.327	0.109	2.61605e-12
Gfra1	2.02166e-16	2.34686	0.251	0.064	2.74198e-12
Evl	2.50025e-16	-1.05089	0.364	0.623	3.39109e-12
Txn1	2.55153e-16	-0.535698	0.919	0.972	3.46065e-12
Eif5a	2.59177e-16	-0.359418	1	1	3.51522e-12
Samhd1	2.74523e-16	-1.52493	0.217	0.473	3.72335e-12
Bcl2	2.98813e-16	1.08168	0.613	0.351	4.05281e-12
Il17a	3.16618e-16	3.48869	0.263	0.076	4.29429e-12
Rpl10a	3.39346e-16	-0.194535	1	1	4.60254e-12
Lamp1	3.6362e-16	0.646695	0.87	0.691	4.93178e-12
St8sia1	4.11067e-16	1.57118	0.358	0.133	5.5753e-12
Sox4	4.28502e-16	0.741929	0.928	0.781	5.81178e-12
Pstpip1	4.86839e-16	0.756827	0.812	0.62	6.60299e-12
Rps6	8.10173e-16	-0.248069	1	1	1.09884e-11
Psap	8.23287e-16	0.54788	0.974	0.896	1.11662e-11
Rsrp1	8.83819e-16	0.503555	0.986	0.969	1.19872e-11
Sdf2l1	1.09014e-15	-0.916939	0.52	0.755	1.47856e-11
Cd164	1.09202e-15	0.695838	0.905	0.732	1.48111e-11
Snrpd1	1.34254e-15	-0.491593	0.974	0.991	1.82088e-11
Btg1	1.34285e-15	0.895562	0.772	0.572	1.82131e-11
Camk2d	1.66874e-15	0.520399	0.991	0.934	2.26331e-11
Calm1	1.92098e-15	-0.38716	1	1	2.60542e-11
Cnn2	1.98221e-15	-0.520948	0.931	0.984	2.68847e-11
Ran	2.17184e-15	-0.424404	0.997	1	2.94566e-11
Tecpr1	2.20317e-15	1.02724	0.659	0.446	2.98815e-11
Bst2	2.23259e-15	-1.24478	0.324	0.573	3.02806e-11
S100a6	2.43294e-15	-1.38987	0.572	0.739	3.29979e-11
Tpt1	3.41258e-15	0.182511	1	1	4.62849e-11
Ftl1	3.50976e-15	0.304537	1	1	4.76029e-11
Chmp1b	3.51926e-15	1.01826	0.627	0.404	4.77317e-11
Actg1	3.5687e-15	-0.356288	1	1	4.84022e-11
Atp5j2	4.98187e-15	-0.310119	1	1	6.75691e-11
Klf3	5.27818e-15	1.02972	0.653	0.439	7.15879e-11
Uqcrb	5.40878e-15	-0.444052	0.974	0.988	7.33592e-11
Rabgap1l	5.63875e-15	0.809134	0.751	0.566	7.64784e-11
Ly6a	7.08905e-15	-3.3161	0.023	0.204	9.61488e-11
Pde6a	7.45518e-15	2.02819	0.263	0.078	1.01115e-10
Ssr4	7.6847e-15	-0.460708	0.98	0.979	1.04228e-10
Banf1	7.86142e-15	-0.469344	0.98	0.991	1.06624e-10
Trp53i11	9.04276e-15	1.03599	0.647	0.428	1.22647e-10
Fbln2	9.95511e-15	1.83516	0.338	0.131	1.35021e-10
Nop10	1.14701e-14	-0.429655	0.986	0.997	1.55569e-10
Zfp219	1.14995e-14	1.215	0.509	0.276	1.55967e-10
Jakmip1	1.22426e-14	0.77537	0.746	0.522	1.66047e-10
Ets1	1.37462e-14	0.468044	0.971	0.933	1.8644e-10
Cks1b	1.37853e-14	-0.521482	0.569	0.85	1.8697e-10
Serinc3	1.81717e-14	0.983054	0.621	0.402	2.46463e-10
Ppm1e	2.24311e-14	2.20674	0.185	0.035	3.04233e-10
Nfkbie	2.34642e-14	1.42285	0.408	0.185	3.18245e-10
Midn	2.38359e-14	0.824523	0.717	0.525	3.23286e-10
Rpl41	2.38896e-14	-0.169111	1	1	3.24015e-10
Cox7a2	2.47877e-14	-0.376346	1	0.998	3.36196e-10
Fam167a	2.51513e-14	1.51538	0.379	0.164	3.41127e-10
Elf1	2.57874e-14	0.592621	0.922	0.841	3.49755e-10
Cxxc5	2.58184e-14	1.48309	0.425	0.211	3.50175e-10
Phb	2.65576e-14	-0.689581	0.653	0.851	3.602e-10
Abracl	2.66039e-14	-0.497599	0.884	0.965	3.60829e-10
Cox6a1	2.7407e-14	-0.399276	0.988	0.998	3.71722e-10
Lipa	2.90103e-14	0.807269	0.754	0.56	3.93466e-10
Gm10282	3.08294e-14	-0.696192	0.595	0.839	4.18139e-10
Zyx	3.64581e-14	0.810003	0.746	0.551	4.94481e-10
Csrnp1	3.85686e-14	1.23696	0.506	0.283	5.23105e-10
Dynlt1b	4.24793e-14	1.43613	0.399	0.185	5.76147e-10
Sipa1	4.54852e-14	0.943743	0.61	0.389	6.16916e-10
Arhgap45	4.86807e-14	0.510653	0.974	0.927	6.60256e-10
Prkd2	5.21699e-14	0.949242	0.621	0.385	7.0758e-10
1110008P14Rik	5.62238e-14	0.718008	0.789	0.591	7.62564e-10
Pclaf	6.87785e-14	-0.294808	0.699	0.921	9.32843e-10
Rbm3	7.09497e-14	-0.300069	1	1	9.6229e-10
Dclre1c	7.10879e-14	1.5204	0.341	0.135	9.64165e-10
Snrpf	7.33958e-14	-0.391541	0.994	0.997	9.95468e-10
1700012B07Rik	9.55186e-14	0.859774	0.711	0.492	1.29552e-09
Ppt2	1.14559e-13	0.796786	0.668	0.434	1.55376e-09
Dhrs3	1.31082e-13	3.10269	0.15	0.022	1.77786e-09
Pnrc1	1.48827e-13	0.649682	0.945	0.843	2.01853e-09
Park7	1.49677e-13	-0.371574	0.997	0.998	2.03007e-09
Eif2s3y	1.60235e-13	1.14702	0.454	0.23	2.17327e-09
Bach1	1.65655e-13	1.25669	0.46	0.24	2.24678e-09
Il17rb	1.67633e-13	1.36649	0.318	0.117	2.27361e-09
Rab27a	1.83981e-13	0.871459	0.682	0.489	2.49534e-09
Fkbp1a	1.93146e-13	0.43665	0.977	0.972	2.61964e-09
Kcna3	2.01038e-13	1.02851	0.572	0.366	2.72667e-09
Pdcd4	2.01895e-13	0.930781	0.607	0.37	2.7383e-09
Eng	2.0488e-13	1.25118	0.436	0.219	2.77878e-09
Ppp1r14b	2.11029e-13	0.537435	0.968	0.922	2.86219e-09
Nhp2	2.16271e-13	-0.632922	0.699	0.879	2.93328e-09
H13	2.22662e-13	0.609113	0.873	0.767	3.01997e-09
Set	2.27619e-13	-0.473931	0.974	0.979	3.0872e-09
Arl6ip1	2.53105e-13	0.424529	0.994	0.998	3.43287e-09
Cenpw	2.63696e-13	-0.942295	0.315	0.58	3.5765e-09
Rps13	2.96796e-13	-0.135143	1	1	4.02544e-09
Nt5c	3.22915e-13	-0.761004	0.442	0.689	4.37969e-09
mt-Atp8	3.40193e-13	0.266814	1	1	4.61404e-09
Hspe1	3.58113e-13	-0.402737	0.994	0.997	4.85709e-09
Rpl27	4.22489e-13	0.187634	1	1	5.73022e-09
Inpp5b	4.41514e-13	1.03072	0.512	0.29	5.98825e-09
Lef1	4.55976e-13	0.72379	0.861	0.737	6.18441e-09
Psmb5	4.76303e-13	-0.387605	0.977	0.998	6.4601e-09
Hist3h2ba	4.81379e-13	1.32982	0.471	0.245	6.52894e-09
Tm6sf1	5.29601e-13	1.3147	0.393	0.187	7.18298e-09
Prps2	5.55409e-13	0.811575	0.668	0.449	7.53301e-09
Hspa5	6.10144e-13	-0.609718	0.928	0.962	8.27539e-09
Ckb	6.11175e-13	0.562748	0.977	0.952	8.28937e-09
Plxnd1	6.17339e-13	1.0206	0.517	0.295	8.37297e-09
Coro2b	6.22461e-13	0.905344	0.584	0.354	8.44244e-09
Plcl1	6.73494e-13	1.75402	0.257	0.085	9.1346e-09
Arhgap4	6.83522e-13	0.791784	0.697	0.522	9.27061e-09
Gng5	7.12381e-13	-0.259847	1	1	9.66202e-09
Gm11808	7.34362e-13	0.837375	0.653	0.446	9.96015e-09
S100a10	7.64866e-13	-0.41204	0.994	0.997	1.03739e-08
Lax1	7.7085e-13	0.859277	0.645	0.439	1.0455e-08
Elovl5	9.25506e-13	0.897301	0.624	0.427	1.25526e-08
Rps27	9.58133e-13	0.211753	1	1	1.29952e-08
Sptssa	1.15964e-12	-0.643764	0.642	0.829	1.57282e-08
Atp5j	1.1937e-12	-0.329255	1	1	1.61902e-08
Itk	1.20824e-12	0.657379	0.812	0.636	1.63873e-08
Agfg2	1.224e-12	0.822435	0.616	0.385	1.66011e-08
Hspa8	1.2343e-12	0.290828	1	1	1.67408e-08
Rpsa	1.24148e-12	-0.154333	1	1	1.68382e-08
Mrpl42	1.26146e-12	-0.668458	0.636	0.822	1.71091e-08
Xlr4a	1.26758e-12	0.8311	0.694	0.522	1.71922e-08
Syk	1.35516e-12	2.0146	0.202	0.052	1.838e-08
Fam210b	1.60662e-12	1.74279	0.237	0.073	2.17906e-08
Dctpp1	1.64432e-12	-0.527163	0.763	0.927	2.23019e-08
Bcl11b	1.65558e-12	0.503556	0.96	0.867	2.24546e-08
Spint2	1.77586e-12	0.614591	0.858	0.791	2.4086e-08
Cirbp	2.34225e-12	0.592549	0.827	0.665	3.17679e-08
Pfdn6	2.83394e-12	-0.663269	0.595	0.8	3.84368e-08
Tbc1d10c	2.84569e-12	0.47455	0.962	0.927	3.85962e-08
Malat1	3.04947e-12	0.48282	1	0.998	4.13599e-08
Sec61g	3.08219e-12	-0.341672	1	0.998	4.18037e-08
Phf10	3.26419e-12	1.15783	0.402	0.193	4.42722e-08
Psmb3	3.41716e-12	-0.35063	0.997	0.998	4.6347e-08
Klk8	3.76404e-12	-0.600124	0.673	0.846	5.10516e-08
D8Ertd738e	4.23585e-12	-0.438274	0.951	0.974	5.74508e-08
Igfbp4	5.04732e-12	0.472473	0.59	0.295	6.84568e-08
Nlrx1	5.14771e-12	1.66828	0.327	0.147	6.98184e-08
Myl10	5.18636e-12	1.2565	0.491	0.287	7.03426e-08
Znrf1	5.44608e-12	0.505127	0.96	0.874	7.38651e-08
Rplp1	5.6971e-12	-0.158969	1	1	7.72697e-08
Cd52	5.84031e-12	-0.314616	1	1	7.92121e-08
Gng10	5.88712e-12	0.955095	0.561	0.358	7.98471e-08
Sytl1	5.96948e-12	0.868871	0.624	0.416	8.09641e-08
Dnm2	6.24129e-12	0.666212	0.74	0.549	8.46506e-08
Arvcf	7.10417e-12	2.16906	0.185	0.047	9.63539e-08
Cenpx	8.07491e-12	-0.632136	0.618	0.82	1.0952e-07
Chchd1	8.29167e-12	-0.574639	0.691	0.86	1.1246e-07
Atp5h	8.42014e-12	-0.323342	0.997	0.998	1.14202e-07
Rpl27a	8.98118e-12	-0.145855	1	1	1.21812e-07
Brf1	9.04303e-12	0.893034	0.581	0.378	1.22651e-07
Arhgap26	9.84595e-12	1.93544	0.188	0.048	1.33541e-07
Cd47	1.05697e-11	0.41005	0.994	0.969	1.43357e-07
Rnf114	1.09407e-11	0.640032	0.777	0.618	1.48389e-07
Psma1	1.17478e-11	-0.539996	0.754	0.879	1.59336e-07
Psmb1	1.43741e-11	-0.324686	1	0.998	1.94957e-07
1700048O20Rik	1.48932e-11	1.97801	0.217	0.067	2.01996e-07
Nedd8	1.49274e-11	-0.385004	0.98	0.993	2.0246e-07
Def6	1.52604e-11	0.456923	0.951	0.877	2.06977e-07
Fxyd7	1.55704e-11	2.72142	0.142	0.026	2.11181e-07
Rnf166	1.64158e-11	0.620156	0.751	0.57	2.22647e-07
Nkg7	1.73157e-11	-0.729277	0.538	0.741	2.34852e-07
Cfl1	1.96927e-11	-0.191434	1	1	2.67093e-07
Uqcr11	2.07135e-11	-0.398685	0.922	0.974	2.80937e-07
Ptprf	2.24052e-11	1.17889	0.408	0.211	3.03881e-07
St3gal6	2.37092e-11	1.54083	0.318	0.142	3.21569e-07
Map4k2	2.37318e-11	0.733931	0.673	0.48	3.21875e-07
Eif4a1	2.41669e-11	-0.26517	1	1	3.27776e-07
Cd3g	2.48772e-11	0.387956	0.997	0.988	3.3741e-07
Nrip1	2.4964e-11	0.56493	0.824	0.658	3.38586e-07
Zfp36l2	2.51913e-11	0.902311	0.572	0.354	3.4167e-07
Gm9493	2.83759e-11	0.388331	0.98	0.94	3.84863e-07
Zfp36l1	2.93831e-11	0.847347	0.682	0.515	3.98523e-07
Uqcc2	3.00873e-11	-0.530227	0.789	0.902	4.08074e-07
Tox	3.10494e-11	0.614232	0.815	0.618	4.21123e-07
Armc7	3.19353e-11	0.933614	0.546	0.339	4.33139e-07
Neil1	3.56883e-11	1.45521	0.292	0.119	4.8404e-07
Ppa1	3.88246e-11	-0.767532	0.373	0.606	5.26578e-07
Esrp1	3.93114e-11	3.06472	0.127	0.021	5.33181e-07
Ube2v1	4.15694e-11	1.0503	0.422	0.221	5.63806e-07
Cd27	4.25784e-11	0.554269	0.879	0.767	5.7749e-07
Nim1k	4.27289e-11	1.43395	0.289	0.117	5.79532e-07
Tnfsf11	4.28796e-11	1.04896	0.506	0.311	5.81576e-07
Smarcd2	4.3056e-11	0.665052	0.708	0.547	5.83969e-07
Atp5l	4.45451e-11	-0.273621	0.997	1	6.04166e-07
Klhl6	4.65252e-11	0.770077	0.621	0.42	6.31022e-07
Elob	4.75642e-11	-0.327666	0.997	1	6.45113e-07
Aagab	4.83471e-11	0.726908	0.679	0.491	6.55732e-07
Sh3bp5	5.05451e-11	1.00892	0.54	0.349	6.85543e-07
Btf3	5.43327e-11	-0.213568	1	1	7.36914e-07
C1qbp	5.52772e-11	-0.479882	0.824	0.936	7.49725e-07
Lig4	5.7635e-11	1.1213	0.393	0.195	7.81703e-07
Arid5a	6.50986e-11	0.928565	0.564	0.375	8.82933e-07
Cox6c	6.84818e-11	-0.270641	1	1	9.28818e-07
Sh3kbp1	7.06472e-11	0.575991	0.893	0.72	9.58188e-07
Sirt2	7.29424e-11	0.925844	0.656	0.499	9.89318e-07
B630019A10Rik	7.58059e-11	1.27622	0.358	0.178	1.02816e-06
Wfs1	7.58699e-11	1.83025	0.191	0.055	1.02902e-06
Cdkn1c	7.77597e-11	1.47976	0.338	0.161	1.05465e-06
Fkbp2	7.88746e-11	-0.825808	0.436	0.632	1.06978e-06
Satb1	1.00376e-10	0.617888	0.829	0.693	1.36141e-06
Nav2	1.0298e-10	0.657459	0.702	0.516	1.39672e-06
Xlr4c	1.10055e-10	1.23089	0.367	0.185	1.49268e-06
Eif2ak3	1.13697e-10	1.60339	0.266	0.105	1.54207e-06
Manf	1.34278e-10	-0.552539	0.968	0.981	1.82121e-06
Cotl1	1.35472e-10	-0.485416	0.775	0.903	1.8374e-06
Psmb7	1.38592e-10	-0.544905	0.616	0.812	1.87972e-06
Rps17	1.47897e-10	-0.235403	1	1	2.00593e-06
Dgkd	1.49426e-10	0.954295	0.483	0.285	2.02666e-06
Git2	1.50499e-10	0.687777	0.711	0.532	2.04121e-06
Tesc	1.54265e-10	-1.32388	0.22	0.406	2.0923e-06
H1f0	1.55447e-10	0.931423	0.688	0.515	2.10833e-06
Rps5	1.6142e-10	-0.11859	1	1	2.18934e-06
Cd81	1.64848e-10	0.585943	0.812	0.648	2.23584e-06
Gm48321	1.90071e-10	1.86144	0.173	0.047	2.57793e-06
Ablim1	1.95594e-10	0.555295	0.829	0.658	2.65284e-06
Prr13	2.04053e-10	-0.703142	0.578	0.741	2.76757e-06
Mpp1	2.12493e-10	0.815122	0.587	0.392	2.88205e-06
Tia1	2.17294e-10	0.57953	0.775	0.589	2.94716e-06
Fdx1	2.26302e-10	0.907247	0.546	0.356	3.06934e-06
Rbmx	2.32876e-10	0.778541	0.665	0.497	3.1585e-06
Nop58	2.46274e-10	-0.610061	0.636	0.827	3.34022e-06
Psme2b	2.64771e-10	-1.74141	0.107	0.275	3.59109e-06
Rpl7a	2.67737e-10	-0.178736	1	1	3.63131e-06
Tgfbr2	2.80564e-10	0.706449	0.717	0.544	3.80529e-06
Usp3	2.93741e-10	0.763904	0.595	0.406	3.984e-06
Snrpd3	2.95941e-10	-0.374313	0.962	0.978	4.01384e-06
Ndufa4	3.35831e-10	-0.284594	0.994	1	4.55488e-06
Irf2bpl	3.47278e-10	0.784713	0.616	0.42	4.71013e-06
Bmp7	3.51005e-10	2.28336	0.147	0.035	4.76068e-06
Lsm4	3.59038e-10	-0.377343	0.962	0.988	4.86963e-06
Ptpre	3.75075e-10	1.14226	0.393	0.207	5.08714e-06
Gsto1	3.75365e-10	-1.50038	0.142	0.32	5.09108e-06
Ptger4	4.24631e-10	1.03999	0.37	0.185	5.75927e-06
Lsm7	4.44191e-10	-0.418229	0.916	0.976	6.02456e-06
Atp5f1	4.55104e-10	-0.271348	0.997	0.998	6.17257e-06
Bag1	4.8242e-10	-0.572495	0.711	0.839	6.54306e-06
Tcrg-C2	4.99124e-10	0.695743	0.575	0.354	6.76962e-06
Eny2	5.17362e-10	-0.503598	0.691	0.846	7.01699e-06
Sf3b6	5.31908e-10	-0.349925	0.965	0.984	7.21426e-06
Itgb2	5.34985e-10	0.62929	0.714	0.522	7.25601e-06
Eif3f	5.57267e-10	0.2555	1	1	7.55821e-06
Mbp	6.08225e-10	0.8116	0.572	0.385	8.24936e-06
Ndufb6	6.10311e-10	-0.415008	0.867	0.955	8.27765e-06
Arhgap9	6.45139e-10	0.502577	0.864	0.722	8.75003e-06
Hist1h2ae	6.68985e-10	-0.418376	0.624	0.841	9.07344e-06
Ostc	6.93002e-10	-0.429054	0.908	0.955	9.39919e-06
Arhgdib	6.93744e-10	-0.272941	1	1	9.40925e-06
Atp5e	7.4276e-10	-0.249189	1	1	1.00741e-05
Tma7	7.44905e-10	-0.297829	1	0.998	1.01031e-05
Hnrnpl	7.94309e-10	0.341325	0.991	0.981	1.07732e-05
Foxn3	8.1387e-10	0.636858	0.694	0.487	1.10385e-05
Tmem108	8.16729e-10	1.06036	0.399	0.216	1.10773e-05
Baz2a	8.50226e-10	0.769615	0.578	0.371	1.15316e-05
Tmem59	8.64362e-10	0.451757	0.884	0.767	1.17233e-05
A930003A15Rik	8.69847e-10	1.55493	0.246	0.098	1.17977e-05
Ptrh1	8.79482e-10	1.22639	0.318	0.149	1.19284e-05
Erh	8.81073e-10	0.610246	0.717	0.547	1.195e-05
Pabpc1	8.83109e-10	0.231301	1	1	1.19776e-05
Nav1	9.19194e-10	2.27331	0.124	0.024	1.2467e-05
Impdh1	9.34458e-10	0.635457	0.691	0.518	1.26741e-05
Lmo4	9.35637e-10	-1.13106	0.353	0.522	1.269e-05
Gpr132	9.87879e-10	0.8599	0.488	0.297	1.33986e-05
P2rx7	9.88246e-10	0.843536	0.529	0.344	1.34036e-05
Arhgef3	1.05475e-09	0.966262	0.413	0.219	1.43056e-05
Hmgb2	1.06578e-09	-0.247306	0.98	0.998	1.44551e-05
Pa2g4	1.07228e-09	-0.383598	0.98	0.991	1.45433e-05
Tomm20	1.08052e-09	-0.345542	0.968	0.993	1.46551e-05
Fam162a	1.27715e-09	-0.637376	0.54	0.718	1.7322e-05
Gtf2h4	1.30967e-09	0.589951	0.746	0.587	1.7763e-05
Uqcr10	1.35285e-09	-0.375575	0.971	0.991	1.83487e-05
Pglyrp2	1.35499e-09	0.646663	0.676	0.503	1.83777e-05
Hspd1	1.38225e-09	-0.511838	0.847	0.94	1.87474e-05
Cetn3	1.43024e-09	-0.595833	0.555	0.753	1.93983e-05
Myl12a	1.58411e-09	-0.308561	0.997	0.998	2.14853e-05
Ncl	1.63488e-09	-0.350717	0.991	1	2.21739e-05
Lrrc42	1.67657e-09	0.721653	0.52	0.314	2.27393e-05
Slc25a41	1.70897e-09	1.92499	0.13	0.028	2.31788e-05
Mrps14	1.83168e-09	-0.472787	0.835	0.919	2.4843e-05
Hsp90aa1	1.87534e-09	-0.378378	0.988	0.993	2.54352e-05
H2afj	1.94246e-09	-0.344272	0.983	0.991	2.63456e-05
Hprt	1.98518e-09	-0.523316	0.653	0.819	2.6925e-05
H2afz	2.05528e-09	-0.279467	1	1	2.78757e-05
Nfkbia	2.18658e-09	0.538025	0.546	0.361	2.96566e-05
Tnfrsf1a	2.18812e-09	0.853312	0.532	0.347	2.96774e-05
Mynn	2.41584e-09	0.919948	0.422	0.237	3.2766e-05
Prkar1a	2.45024e-09	0.307854	1	0.99	3.32326e-05
Gm525	2.45383e-09	3.24529	0.15	0.041	3.32813e-05
1810037I17Rik	2.45542e-09	-0.525491	0.662	0.851	3.33028e-05
Zfp36	2.74235e-09	0.912716	0.59	0.401	3.71945e-05
Magoh	3.00539e-09	-0.420586	0.775	0.917	4.07621e-05
Dbi	3.08167e-09	-0.346114	0.951	0.995	4.17967e-05
Gem	3.12656e-09	1.37684	0.22	0.083	4.24056e-05
Ppp1r3b	3.15591e-09	2.28532	0.136	0.033	4.28037e-05
Dnajb1	3.2246e-09	0.645996	0.685	0.556	4.37352e-05
Unc5cl	3.35825e-09	1.75687	0.191	0.066	4.5548e-05
Rtkn	3.52298e-09	1.35577	0.231	0.09	4.77822e-05
Igsf23	3.66307e-09	1.3134	0.272	0.119	4.96822e-05
Tmem151b	3.93118e-09	1.93781	0.176	0.057	5.33186e-05
Dzip1	4.02067e-09	2.41022	0.118	0.024	5.45323e-05
Ost4	4.05352e-09	-0.354601	0.957	0.979	5.49778e-05
Sh2d1a	4.1316e-09	-0.464046	0.691	0.832	5.60369e-05
Abhd8	4.22051e-09	0.418214	0.928	0.883	5.72427e-05
Carmil2	4.5649e-09	0.676482	0.656	0.491	6.19137e-05
Cbx4	4.67135e-09	0.883804	0.448	0.264	6.33575e-05
Rps29	4.72766e-09	0.143855	1	1	6.41213e-05
Glcci1	4.94063e-09	1.19824	0.347	0.181	6.70097e-05
Slc38a1	5.84442e-09	0.470817	0.858	0.769	7.92679e-05
Fcho1	5.895e-09	0.660614	0.668	0.52	7.99539e-05
Gmnn	5.92655e-09	-0.482501	0.405	0.646	8.03818e-05
Dap	5.96947e-09	0.724757	0.52	0.339	8.09639e-05
Sec11c	6.26755e-09	-0.556022	0.763	0.857	8.50067e-05
5730559C18Rik	6.36491e-09	0.977655	0.367	0.195	8.63272e-05
Cox7c	6.43751e-09	-0.251591	1	0.998	8.73119e-05
Ndufa12	6.50485e-09	-0.435012	0.777	0.922	8.82253e-05
Sesn3	6.5214e-09	0.761347	0.5	0.311	8.84497e-05
Tomm5	6.65261e-09	-0.52049	0.691	0.846	9.02294e-05
Fam83a	6.96756e-09	-1.20305	0.179	0.351	9.4501e-05
Arhgef2	7.37376e-09	0.684179	0.59	0.404	0.00010001
Cd7	7.536e-09	-1.21092	0.142	0.313	0.000102211
Sept9	7.57235e-09	0.384472	0.954	0.912	0.000102704
Sept1	8.14781e-09	0.231509	0.997	1	0.000110509
Ndufb7	8.16477e-09	-0.353691	0.96	0.988	0.000110739
Lcp2	8.26261e-09	0.51602	0.824	0.68	0.000112066
Runx3	8.40849e-09	0.737398	0.639	0.48	0.000114044
Gm13855	8.45885e-09	2.27622	0.113	0.022	0.000114727
Psme1	9.13513e-09	-0.302354	0.983	0.997	0.0001239
Yeats2	9.5746e-09	1.04235	0.373	0.206	0.00012986
Kcnn4	9.62349e-09	0.715245	0.592	0.432	0.000130523
Mtf2	1.01122e-08	0.613823	0.659	0.485	0.000137152
Psmb2	1.0158e-08	-0.336859	0.974	0.991	0.000137773
Gm10093	1.02893e-08	1.80692	0.162	0.05	0.000139553
Cnot2	1.04414e-08	0.688344	0.639	0.485	0.000141617
Arpc1b	1.04752e-08	-0.289421	0.991	0.995	0.000142075
Mef2a	1.09763e-08	0.905521	0.488	0.314	0.000148871
Tmem258	1.14646e-08	-0.295912	0.988	0.995	0.000155495
Cd8a	1.15122e-08	0.974201	0.5	0.339	0.00015614
H3f3b	1.17987e-08	0.243424	1	1	0.000160026
Vezf1	1.24318e-08	0.898911	0.428	0.25	0.000168612
Bpgm	1.27316e-08	0.892538	0.41	0.237	0.000172678
Dennd1c	1.31286e-08	0.865648	0.451	0.273	0.000178063
Nucks1	1.31391e-08	-0.491414	0.514	0.713	0.000178205
Cux1	1.3783e-08	0.387563	0.899	0.801	0.000186939
Psma7	1.40667e-08	-0.310054	0.986	0.997	0.000190787
Slc35d1	1.5004e-08	1.28974	0.338	0.185	0.000203499
Atg7	1.52322e-08	1.21228	0.298	0.147	0.000206594
Dusp2	1.54453e-08	0.856477	0.682	0.57	0.000209484
Traf4	1.70289e-08	0.555817	0.754	0.63	0.000230963
Rasgrp2	1.8153e-08	-0.616036	0.549	0.732	0.000246209
Ppp1r13b	1.89077e-08	1.40792	0.24	0.104	0.000256445
Cblb	1.94828e-08	0.833802	0.413	0.235	0.000264245
C030034L19Rik	1.99663e-08	0.977257	0.413	0.25	0.000270803
Wdr6	2.02158e-08	0.686355	0.587	0.416	0.000274187
Dennd2d	2.2086e-08	0.93025	0.419	0.247	0.000299553
Nck2	2.2485e-08	1.13809	0.376	0.219	0.000304964
Kdm5b	2.2941e-08	0.636227	0.662	0.509	0.000311149
Ptges3	2.41021e-08	-0.465907	0.743	0.889	0.000326897
Man2a2	2.45167e-08	0.96356	0.315	0.155	0.000332519
Sfr1	2.45977e-08	-0.473853	0.685	0.838	0.000333618
Ptma	2.47876e-08	-0.149384	1	1	0.000336195
Mrpl20	2.53557e-08	-0.451653	0.795	0.877	0.000343899
Ubald2	2.58892e-08	0.416095	0.922	0.82	0.000351135
Grcc10	2.64545e-08	0.370732	0.968	0.927	0.000358803
Rpl3	3.08106e-08	-0.167644	1	1	0.000417884
Kdm4b	3.08978e-08	1.10319	0.332	0.178	0.000419067
Ctsb	3.16362e-08	0.488317	0.792	0.649	0.000429082
Desi1	3.17339e-08	0.609753	0.708	0.544	0.000430407
Mettl9	3.17643e-08	0.543306	0.691	0.527	0.000430819
Btg2	3.23661e-08	0.681311	0.714	0.589	0.000438981
Msi2	3.31729e-08	0.859831	0.431	0.257	0.000449924
Snrpd2	3.38153e-08	-0.323026	0.974	0.986	0.000458637
Rpl10	3.54257e-08	-0.148978	1	1	0.000480479
Mcl1	3.54504e-08	0.68025	0.543	0.359	0.000480813
Ctnnb1	3.5476e-08	0.549051	0.694	0.528	0.00048116
Plxdc2	3.55957e-08	1.10643	0.338	0.185	0.000482785
Ptk2b	3.63311e-08	0.805076	0.52	0.359	0.000492758
Canx	3.66569e-08	-0.404211	0.908	0.946	0.000497177
Mkrn1	3.70134e-08	0.567958	0.665	0.508	0.000502013
Eif4b	3.94006e-08	0.369731	0.948	0.87	0.000534391
Herc3	3.98346e-08	1.10084	0.344	0.192	0.000540277
Ppp1r9b	4.14123e-08	0.800797	0.393	0.219	0.000561675
Cenpa	4.15918e-08	-0.419955	0.318	0.532	0.00056411
Fyco1	4.18702e-08	0.750965	0.361	0.192	0.000567885
Rapgef3	4.62197e-08	1.28336	0.237	0.104	0.000626878
Narf	4.74014e-08	0.751155	0.526	0.354	0.000642905
Mrps24	4.76737e-08	-0.380043	0.841	0.919	0.000646598
Tomm34	4.81432e-08	0.610597	0.613	0.43	0.000652966
Sun2	4.81796e-08	0.758221	0.535	0.37	0.000653459
Cxcr4	4.94541e-08	1.25299	0.283	0.143	0.000670746
Flot1	5.25909e-08	0.728542	0.569	0.406	0.000713291
Arhgap30	5.51213e-08	0.390958	0.905	0.855	0.00074761
Patz1	5.56803e-08	0.724471	0.512	0.33	0.000755192
Uba7	5.58838e-08	1.02573	0.303	0.154	0.000757952
Chst15	5.69169e-08	1.39049	0.197	0.076	0.000771965
Reep5	5.78556e-08	-0.496978	0.659	0.784	0.000784695
Zfp266	5.93317e-08	0.718462	0.503	0.335	0.000804717
Arhgef1	6.25001e-08	0.338447	0.96	0.967	0.000847689
Ctsl	6.26451e-08	0.655505	0.595	0.411	0.000849656
Anxa2	6.30519e-08	-0.398434	0.697	0.883	0.000855173
Cpne8	6.34745e-08	-1.69533	0.121	0.264	0.000860904
Nme4	6.46839e-08	-0.944206	0.272	0.428	0.000877308
Tkt	6.4926e-08	-0.347251	0.945	0.99	0.000880591
Mob3a	6.59297e-08	0.589231	0.627	0.473	0.000894205
Lman2l	6.59518e-08	0.927216	0.384	0.223	0.000894504
Rac2	7.10287e-08	0.200711	1	1	0.000963363
Slc9a3r1	7.70559e-08	0.310289	0.988	0.962	0.00104511
Sema4d	7.70992e-08	0.543483	0.699	0.537	0.0010457
Marcksl1	7.81053e-08	0.335937	0.988	0.945	0.00105934
Rcsd1	7.81086e-08	0.460061	0.867	0.807	0.00105939
Rpl26	8.14609e-08	-0.131036	1	1	0.00110485
Ctbp1	8.1893e-08	0.488966	0.818	0.675	0.00111071
Gid8	8.20977e-08	0.681909	0.566	0.396	0.00111349
Mxd4	8.33171e-08	0.566698	0.74	0.608	0.00113003
Trim11	8.4758e-08	0.950024	0.312	0.161	0.00114957
Il16	8.94679e-08	0.529961	0.751	0.622	0.00121345
Rps15	9.05833e-08	-0.202223	1	1	0.00122858
Mrto4	9.32825e-08	-0.604603	0.48	0.644	0.00126519
Ndufs6	9.84226e-08	-0.425371	0.711	0.872	0.00133491
Tmem229b	1.02581e-07	0.736665	0.448	0.269	0.00139131
Cat	1.04966e-07	0.560588	0.665	0.494	0.00142365
Tlr12	1.13211e-07	1.32034	0.211	0.088	0.00153549
Dtx3	1.1339e-07	0.767286	0.488	0.321	0.00153791
Ndufb8	1.15248e-07	-0.320308	0.954	0.984	0.0015631
Rpl24	1.16455e-07	-0.131177	1	1	0.00157948
Prkcb	1.19934e-07	0.742791	0.52	0.359	0.00162666
Hmgb1	1.19944e-07	0.296711	1	1	0.0016268
Tyms	1.21161e-07	-0.376852	0.327	0.542	0.0016433
Pgs1	1.21253e-07	0.665112	0.642	0.491	0.00164456
Mgat1	1.22566e-07	0.803333	0.419	0.254	0.00166236
Lmbr1l	1.29166e-07	0.842327	0.384	0.225	0.00175187
Card9	1.31188e-07	1.2177	0.199	0.079	0.00177931
Atp5c1	1.31641e-07	-0.233096	1	1	0.00178544
Ei24	1.3175e-07	0.986717	0.355	0.206	0.00178692
Kdm5a	1.36356e-07	0.59649	0.624	0.453	0.00184939
Wnt8b	1.39522e-07	1.08383	0.28	0.14	0.00189234
Bbc3	1.39848e-07	1.39487	0.165	0.057	0.00189676
Atxn10	1.43804e-07	0.35156	0.893	0.834	0.00195042
Hes6	1.44605e-07	0.493303	0.717	0.58	0.00196128
Wdr78	1.5041e-07	1.25736	0.202	0.083	0.00204002
Rpl4	1.53569e-07	-0.15484	1	1	0.00208286
Cass4	1.55537e-07	1.85827	0.124	0.035	0.00210954
D16Ertd472e	1.5947e-07	0.636966	0.63	0.492	0.00216289
Bola3	1.61292e-07	-0.573613	0.529	0.698	0.0021876
Rps24	1.67701e-07	0.0917114	1	1	0.00227453
Trpv2	1.6799e-07	0.536887	0.685	0.551	0.00227845
Usp7	1.68918e-07	0.638564	0.532	0.366	0.00229103
mt-Nd1	1.77093e-07	-0.196215	1	1	0.00240192
Zbtb8b	1.77763e-07	1.12049	0.327	0.181	0.00241099
Tomm7	1.77822e-07	-0.26301	0.988	0.995	0.0024118
Nkd1	1.80814e-07	1.43186	0.171	0.062	0.00245238
Rbm7	1.82501e-07	0.575521	0.613	0.466	0.00247527
Stat4	1.83022e-07	0.77059	0.457	0.288	0.00248233
Pdlim1	1.88974e-07	-0.512794	0.572	0.729	0.00256306
Eif4ebp1	1.94427e-07	-1.25721	0.09	0.225	0.00263702
Gm43352	2.06739e-07	1.21164	0.269	0.133	0.002804
Rwdd2a	2.17288e-07	1.54535	0.173	0.066	0.00294708
Rbpms2	2.19284e-07	1.58104	0.136	0.041	0.00297414
Tmc8	2.31156e-07	0.764405	0.471	0.307	0.00313517
Stk4	2.35723e-07	0.591613	0.682	0.53	0.00319711
Txnip	2.43385e-07	0.59506	0.645	0.494	0.00330103
Rps11	2.44914e-07	-0.108864	1	1	0.00332177
Cnn3	2.47712e-07	1.41702	0.251	0.124	0.00335971
Aff1	2.53124e-07	1.11535	0.292	0.154	0.00343312
Timm13	2.54858e-07	-0.328292	0.916	0.95	0.00345664
Sh2d2a	2.56207e-07	0.415525	0.899	0.826	0.00347493
Smim14	2.60296e-07	0.681608	0.491	0.325	0.00353039
Ypel5	2.63111e-07	0.723251	0.41	0.25	0.00356857
Fam102a	2.66493e-07	0.776512	0.488	0.339	0.00361445
Gm6213	2.67036e-07	-1.19765	0.15	0.292	0.00362181
2610035D17Rik	2.70112e-07	1.48563	0.171	0.064	0.00366352
Galnt12	2.71079e-07	0.50384	0.717	0.613	0.00367665
Pacsin1	2.76723e-07	0.919669	0.364	0.214	0.0037532
Vav1	2.83879e-07	0.535817	0.682	0.575	0.00385025
Sdhb	2.84612e-07	-0.371812	0.882	0.964	0.0038602
Evi5l	2.86101e-07	1.66262	0.156	0.055	0.00388039
Serf2	2.909e-07	-0.158282	1	1	0.00394548
Itm2b	2.92426e-07	0.219428	1	1	0.00396618
Ccnd3	2.95203e-07	0.464004	0.861	0.829	0.00400384
Rnaset2b	3.12395e-07	1.40719	0.185	0.074	0.00423702
Mrpl21	3.12426e-07	-0.488308	0.578	0.734	0.00423743
Zfp553	3.18947e-07	0.913903	0.321	0.178	0.00432588
Palm	3.20248e-07	0.860029	0.382	0.23	0.00434353
Rpl31	3.26107e-07	-0.182952	1	1	0.00442299
Wdr33	3.36228e-07	0.38704	0.87	0.819	0.00456026
Prkcq	3.57538e-07	0.49106	0.723	0.558	0.00484929
Gsn	3.64986e-07	0.840972	0.431	0.28	0.0049503
Hmgn2	3.67396e-07	-0.258768	0.988	0.997	0.00498299
Acads	3.77438e-07	0.547241	0.636	0.494	0.00511919
2410015M20Rik	3.81287e-07	-0.350559	0.884	0.921	0.0051714
Sem1	3.86665e-07	-0.20784	1	0.998	0.00524434
Serbp1	3.87677e-07	-0.217064	1	1	0.00525806
Rap1gap2	3.99858e-07	1.60077	0.133	0.041	0.00542327
Adrm1	4.07122e-07	0.638551	0.54	0.406	0.00552179
Trac	4.07338e-07	0.793196	0.347	0.197	0.00552473
Hipk1	4.16979e-07	0.919984	0.353	0.207	0.00565549
Rassf5	4.18836e-07	0.474555	0.777	0.617	0.00568067
Idh2	4.22019e-07	0.439513	0.746	0.623	0.00572384
Ergic3	4.37618e-07	0.481086	0.714	0.56	0.00593541
Cmah	4.39157e-07	1.06692	0.289	0.15	0.00595629
B2m	4.49946e-07	-0.30807	0.991	1	0.00610262
Mgat5	4.52707e-07	0.772953	0.486	0.337	0.00614006
H3f3a	4.52711e-07	0.167046	1	1	0.00614012
Phgdh	4.62174e-07	-0.349791	0.916	0.96	0.00626846
Cbl	4.68699e-07	0.414766	0.812	0.701	0.00635696
Rora	4.83375e-07	-0.66999	0.344	0.523	0.00655602
Tbc1d1	4.85698e-07	1.04468	0.301	0.164	0.00658752
Arap2	5.05689e-07	1.46793	0.168	0.064	0.00685866
Txk	5.1078e-07	0.46389	0.74	0.608	0.0069277
Akirin1	5.29108e-07	0.46611	0.777	0.658	0.00717629
Gpsm3	5.36699e-07	0.295545	0.968	0.965	0.00727924
Llph	5.42798e-07	-0.409212	0.734	0.851	0.00736197
Vamp2	5.52692e-07	0.838369	0.416	0.269	0.00749616
Usmg5	5.56657e-07	-0.232405	0.994	0.998	0.00754994
Slc43a2	5.64562e-07	0.557378	0.671	0.509	0.00765715
Dclk2	5.65248e-07	1.0949	0.289	0.155	0.00766645
Atox1	5.71449e-07	-0.328009	0.905	0.959	0.00775056
Birc5	5.8364e-07	-0.177373	0.338	0.57	0.00791591
Hmga1b	5.85783e-07	1.87404	0.113	0.031	0.00794497
Gprasp2	6.05405e-07	1.83795	0.113	0.031	0.00821111
Vamp1	6.08913e-07	1.20377	0.223	0.104	0.00825869
Impdh2	6.20552e-07	-0.355699	0.887	0.952	0.00841654
Lyst	6.21006e-07	1.28089	0.22	0.102	0.0084227
Prodh	6.22662e-07	1.00869	0.223	0.1	0.00844516
Pfkfb3	6.53717e-07	1.0569	0.225	0.104	0.00886636
Mtch2	6.67637e-07	-0.589528	0.454	0.598	0.00905517
Mier1	6.79723e-07	0.483764	0.749	0.62	0.00921909
St8sia4	7.10714e-07	0.715824	0.399	0.244	0.00963942
Mbd6	7.14761e-07	0.917878	0.295	0.157	0.0096943
Spop	7.34095e-07	0.836613	0.436	0.297	0.00995653
Adprhl2	7.48338e-07	0.720849	0.474	0.326	0.0101497
Bzw2	7.7082e-07	0.290451	0.988	0.983	0.0104546
Tmem120b	7.93501e-07	1.21672	0.205	0.092	0.0107622
Smad3	8.07385e-07	0.669106	0.448	0.285	0.0109506
Stk17b	8.30184e-07	0.468857	0.824	0.767	0.0112598
Rps6kb2	8.47613e-07	0.863473	0.332	0.188	0.0114962
Dpy30	8.49905e-07	-0.436726	0.65	0.803	0.0115273
Tert	8.53145e-07	2.13511	0.101	0.026	0.0115712
Gm10076	8.56713e-07	-0.359371	0.844	0.914	0.0116196
Pik3r5	8.7935e-07	0.9421	0.272	0.14	0.0119266
Lsm6	8.89601e-07	-0.4091	0.803	0.896	0.0120657
mt-Cytb	9.17083e-07	-0.177321	1	1	0.0124384
Map7d1	9.41054e-07	0.714502	0.477	0.328	0.0127635
1500009L16Rik	9.51571e-07	-0.644939	0.419	0.575	0.0129062
Slc39a6	9.55362e-07	0.835502	0.41	0.269	0.0129576
Pard6g	9.6458e-07	1.04006	0.286	0.157	0.0130826
Atp13a2	9.80669e-07	0.987643	0.347	0.212	0.0133008
Jarid2	9.89937e-07	0.773423	0.425	0.276	0.0134265
Sorl1	1.00322e-06	1.05857	0.246	0.123	0.0136066
Acss1	1.02483e-06	0.872351	0.332	0.19	0.0138998
Trim24	1.07493e-06	0.791087	0.416	0.266	0.0145793
1600020E01Rik	1.07971e-06	0.856002	0.321	0.18	0.0146441
Btf3l4	1.0812e-06	0.7371	0.442	0.29	0.0146643
Cox4i1	1.09407e-06	-0.148789	1	1	0.0148389
Ldlrad4	1.09978e-06	0.969067	0.35	0.211	0.0149163
Pttg1	1.10761e-06	-0.316571	0.272	0.454	0.0150225
Mrpl12	1.11069e-06	-0.396567	0.789	0.9	0.0150643
Spen	1.12083e-06	0.896201	0.393	0.256	0.0152019
Psma4	1.1292e-06	-0.405129	0.853	0.922	0.0153153
mt-Nd2	1.14209e-06	-0.221834	1	1	0.0154902
1110008F13Rik	1.14792e-06	-0.380748	0.801	0.895	0.0155692
Eif1ax	1.15795e-06	-0.388401	0.783	0.87	0.0157053
Ddit4	1.16101e-06	0.475824	0.87	0.762	0.0157468
Dnmt3a	1.18299e-06	0.652849	0.529	0.378	0.0160448
Kif21b	1.19538e-06	0.632874	0.613	0.463	0.0162129
Pgk1	1.1974e-06	-0.256784	1	1	0.0162404
Rps23	1.19769e-06	-0.124026	1	1	0.0162443
Rapsn	1.21885e-06	-1.3161	0.087	0.206	0.0165312
Rab11b	1.24753e-06	0.39974	0.789	0.693	0.0169203
Il17re	1.25357e-06	0.59206	0.627	0.48	0.0170022
Nsg2	1.26368e-06	1.79342	0.113	0.033	0.0171393
Camk4	1.29839e-06	0.316116	0.962	0.922	0.01761
Ifnar2	1.30803e-06	0.682849	0.361	0.211	0.0177409
Lrp6	1.35363e-06	1.1666	0.234	0.116	0.0183592
Kansl1l	1.37829e-06	1.4256	0.145	0.052	0.0186937
Fli1	1.38915e-06	0.401164	0.812	0.691	0.018841
Tube1	1.397e-06	0.835901	0.358	0.212	0.0189474
Rpl36al	1.486e-06	0.29387	0.962	0.902	0.0201546
Pdap1	1.48874e-06	-0.398041	0.725	0.832	0.0201917
H2afy	1.50662e-06	0.33031	0.948	0.884	0.0204343
Cnot6l	1.54105e-06	0.559484	0.618	0.472	0.0209013
Lcor	1.54327e-06	0.983799	0.205	0.092	0.0209314
Syf2	1.54538e-06	0.458665	0.682	0.534	0.02096
Il18r1	1.54795e-06	-1.28368	0.104	0.226	0.0209949
Trpc4ap	1.55789e-06	0.495049	0.624	0.472	0.0211297
Fstl4	1.5644e-06	1.51652	0.124	0.04	0.021218
Ubac2	1.61249e-06	0.4238	0.72	0.596	0.0218702
Cnp	1.62791e-06	0.547241	0.618	0.459	0.0220794
Gtpbp2	1.65455e-06	0.830254	0.408	0.273	0.0224407
Pik3ip1	1.6746e-06	0.986583	0.387	0.254	0.0227126
Rpl9-ps6	1.74274e-06	-1.12757	0.153	0.285	0.0236368
Adh5	1.75217e-06	-0.37913	0.746	0.862	0.0237647
Foxo1	1.75508e-06	0.661204	0.468	0.313	0.0238041
Prelid1	1.76937e-06	-0.254618	0.994	0.995	0.0239979
Ndufa2	1.7825e-06	-0.278073	0.951	0.988	0.024176
Mrpl23	1.90576e-06	-0.309908	0.934	0.957	0.0258478
Dkc1	1.94713e-06	-0.567064	0.448	0.606	0.0264089
Diablo	2.02153e-06	1.05558	0.257	0.135	0.027418
Slc44a2	2.07003e-06	0.652392	0.564	0.437	0.0280758
Exosc8	2.07317e-06	-0.457011	0.546	0.699	0.0281184
Parp11	2.07387e-06	0.997364	0.272	0.147	0.0281279
Stmn1	2.14272e-06	-0.100865	0.986	0.993	0.0290617
mt-Nd5	2.15686e-06	-0.22759	0.991	0.988	0.0292535
Dgkz	2.17539e-06	0.522933	0.604	0.449	0.0295048
Wdr27	2.1811e-06	1.76926	0.124	0.041	0.0295822
Psmb6	2.20531e-06	-0.294581	0.954	0.974	0.0299106
Rpl37	2.22699e-06	-0.116013	1	1	0.0302047
Grifin	2.23276e-06	-1.05162	0.179	0.313	0.0302829
Churc1	2.33191e-06	0.671584	0.506	0.373	0.0316277
Vegfa	2.34051e-06	1.76833	0.121	0.04	0.0317443
Ankrd12	2.36399e-06	0.580859	0.555	0.401	0.0320628
Ybx1	2.41025e-06	-0.198878	1	1	0.0326902
Mdh1	2.4271e-06	-0.275687	0.991	0.993	0.0329188
Snrpb	2.43943e-06	-0.215233	0.991	0.997	0.0330861
Atp1b3	2.44778e-06	-0.56769	0.532	0.68	0.0331993
Arid1a	2.60365e-06	0.475003	0.665	0.528	0.0353133
Slc10a3	2.61413e-06	1.64091	0.113	0.035	0.0354554
Gdi1	2.63016e-06	0.609633	0.587	0.456	0.0356728
Mns1	2.64601e-06	1.12612	0.277	0.155	0.0358878
Chd1	2.65517e-06	0.453285	0.688	0.56	0.0360121
Aff4	2.68957e-06	0.567112	0.653	0.527	0.0364787
Rrm2	2.72243e-06	0.0577692	0.341	0.553	0.0369243
Slc16a5	2.73176e-06	0.855885	0.373	0.235	0.0370509
Inpp4a	2.75636e-06	1.37714	0.205	0.098	0.0373845
Ubn1	2.78036e-06	0.481137	0.685	0.558	0.03771
Atp5b	2.78177e-06	-0.211025	1	1	0.0377291
Macrod2	3.1474e-06	0.894794	0.272	0.145	0.0426882
Bcl2l11	3.14854e-06	1.21441	0.194	0.088	0.0427036
Dusp12	3.1723e-06	0.50845	0.708	0.601	0.0430259
Fbxw4	3.25623e-06	0.893283	0.364	0.233	0.0441643
Aftph	3.31718e-06	0.968859	0.277	0.152	0.0449909
Dok2	3.32323e-06	0.414256	0.728	0.585	0.045073
Tnfaip3	3.32829e-06	1.21441	0.202	0.095	0.0451416
Mturn	3.33675e-06	0.643256	0.509	0.363	0.0452564
Gfi1	3.354e-06	1.3617	0.171	0.073	0.0454903
Ctsa	3.44141e-06	0.599518	0.572	0.439	0.0466758
Prdx5	3.47586e-06	0.344179	0.835	0.77	0.0471431
Rab18	3.48958e-06	0.638322	0.465	0.314	0.0473291
Srp9	3.52463e-06	-0.287952	0.936	0.96	0.0478045
Tspan14	3.57224e-06	0.578587	0.578	0.425	0.0484502
Cnot8	3.5847e-06	0.507224	0.561	0.392	0.0486192
Rab19	3.72581e-06	0.786779	0.488	0.363	0.0505332
Cdkn2d	3.74847e-06	0.561494	0.54	0.402	0.0508405
Ppp1cb	3.81082e-06	0.514328	0.653	0.573	0.0516862
Usf2	3.83942e-06	0.660822	0.517	0.39	0.052074
Adam12	3.84281e-06	1.01644	0.301	0.174	0.05212
Iqgap1	3.87401e-06	-0.685689	0.387	0.535	0.0525432
Cks2	3.88981e-06	-0.223723	0.5	0.694	0.0527575
Eif3k	3.91318e-06	-0.195566	0.997	1	0.0530744
Rnf111	3.95489e-06	0.90227	0.338	0.209	0.0536402
Zp1	3.98858e-06	0.903256	0.35	0.218	0.0540971
Swi5	4.00407e-06	-0.252646	0.98	0.998	0.0543072
Dcaf7	4.03511e-06	0.578404	0.5	0.351	0.0547282
Atp6v0c	4.04514e-06	0.350899	0.934	0.886	0.0548643
Apex1	4.08762e-06	-0.458335	0.491	0.689	0.0554403
Cd3e	4.1263e-06	0.150551	1	1	0.0559649
Homer3	4.12978e-06	0.866366	0.286	0.159	0.0560122
Rab24	4.18922e-06	0.539628	0.613	0.478	0.0568184
Tedc1	4.20926e-06	0.825253	0.309	0.18	0.0570901
Tpi1	4.27778e-06	-0.316366	0.957	0.981	0.0580195
Pank2	4.35513e-06	0.579691	0.471	0.314	0.0590687
Chchd3	4.36226e-06	0.441327	0.873	0.796	0.0591653
R3hdm4	4.46617e-06	0.428744	0.697	0.561	0.0605747
Rbms2	4.49336e-06	0.926237	0.289	0.162	0.0609435
Wdr83os	4.51254e-06	-0.391284	0.705	0.815	0.0612036
Mapk1	4.53756e-06	0.401386	0.74	0.646	0.0615429
Rest	4.54591e-06	0.537677	0.569	0.42	0.0616562
Cactin	4.57088e-06	0.966915	0.28	0.159	0.0619948
Myo6	4.58424e-06	-0.438679	0.194	0.337	0.0621761
Gtpbp6	4.59306e-06	0.772745	0.315	0.183	0.0622956
Hpf1	4.61487e-06	-0.478888	0.442	0.627	0.0625915
Dnajc19	4.64881e-06	-0.438311	0.561	0.722	0.0630518
Cct3	4.74667e-06	-0.317877	0.887	0.931	0.0643791
Arid2	4.88748e-06	0.677696	0.445	0.304	0.0662889
Chpt1	4.97468e-06	1.07537	0.168	0.071	0.0674715
Parvg	5.06992e-06	0.312157	0.931	0.889	0.0687633
Cd48	5.08417e-06	-0.572585	0.506	0.63	0.0689566
Sigirr	5.37018e-06	0.750209	0.37	0.231	0.0728358
Gm14410	5.43271e-06	1.10233	0.168	0.071	0.0736838
Btrc	5.44562e-06	0.912716	0.249	0.13	0.0738589
Orai2	5.72022e-06	0.685181	0.468	0.326	0.0775833
Stat5b	5.74789e-06	0.625069	0.454	0.307	0.0779586
Skp1a	5.82867e-06	-0.245989	0.977	0.995	0.0790542
Elk3	5.97411e-06	0.815142	0.347	0.214	0.0810269
Ddx39	5.99567e-06	-0.34265	0.809	0.895	0.0813193
Eef1g	6.06905e-06	-0.204811	0.997	0.998	0.0823145
Gmfg	6.07085e-06	0.215231	1	0.991	0.0823389
Ptp4a3	6.15528e-06	0.581269	0.48	0.337	0.0834841
Ggps1	6.16859e-06	0.56946	0.454	0.307	0.0836645
Cdca4	6.17638e-06	0.481648	0.65	0.525	0.0837702
Fam212a	6.4746e-06	1.36092	0.147	0.059	0.087815
Rchy1	6.51209e-06	0.474711	0.581	0.421	0.0883235
Cd2	6.5271e-06	-1.67225	0.055	0.152	0.088527
Rras2	6.53189e-06	0.749364	0.39	0.254	0.0885921
Ndufb11	6.59846e-06	-0.193769	0.997	0.998	0.0894949
Ak2	6.729e-06	-0.362905	0.717	0.857	0.0912654
Fbxl12	6.73575e-06	0.497187	0.618	0.489	0.0913569
Dym	6.74445e-06	0.825847	0.298	0.169	0.0914749
Maf	6.77736e-06	0.266809	0.98	0.948	0.0919214
Ing4	6.77928e-06	0.520399	0.592	0.449	0.0919474
Tmem50a	6.89958e-06	0.251902	0.977	0.971	0.093579
Csnk1a1	7.20327e-06	0.284731	0.942	0.905	0.097698
Mcm5	7.21978e-06	-0.297426	0.523	0.722	0.0979219
Kmt5c	7.24514e-06	0.806517	0.324	0.193	0.0982658
Fam110a	7.27066e-06	1.26721	0.217	0.112	0.098612
Sbk1	7.3899e-06	0.939189	0.24	0.126	0.100229
Mrps15	7.51086e-06	-0.40503	0.584	0.727	0.10187
Spata13	7.53042e-06	0.572351	0.517	0.373	0.102135
Med13l	7.60108e-06	0.813675	0.303	0.176	0.103093
AI480526	7.60656e-06	1.1864	0.199	0.097	0.103168
Tmem123	7.84529e-06	0.767121	0.471	0.34	0.106406
Tmem131l	7.85605e-06	0.705478	0.419	0.283	0.106552
Anxa6	7.89133e-06	-0.339433	0.882	0.938	0.10703
Mta2	7.9175e-06	0.414256	0.775	0.674	0.107385
Ip6k2	7.96879e-06	0.62172	0.514	0.38	0.108081
Washc1	7.97083e-06	0.67297	0.448	0.309	0.108108
Wdr37	7.99455e-06	0.595361	0.35	0.211	0.10843
Pitpnm1	8.23664e-06	0.733423	0.497	0.375	0.111714
a	8.24504e-06	1.19847	0.234	0.126	0.111827
Kdm1b	8.64304e-06	1.71242	0.113	0.038	0.117225
Hnrnpll	8.73701e-06	0.399307	0.746	0.642	0.1185
Abhd17a	8.77221e-06	0.593487	0.529	0.39	0.118978
Slc25a20	8.88031e-06	0.802498	0.318	0.192	0.120444
Rbm39	8.96153e-06	0.199668	0.997	0.998	0.121545
Gadd45a	9.11388e-06	1.41264	0.15	0.062	0.123612
Pgpep1	9.11504e-06	1.01697	0.22	0.111	0.123627
Dgke	9.19682e-06	0.929204	0.223	0.112	0.124736
Gsk3b	9.39568e-06	0.512981	0.604	0.466	0.127434
Pan3	9.55727e-06	0.804778	0.382	0.256	0.129625
Npm3	9.82985e-06	-0.324866	0.769	0.884	0.133322
AI504432	9.85726e-06	0.885085	0.338	0.218	0.133694
Baz2b	1.02089e-05	0.647032	0.376	0.24	0.138464
Lysmd3	1.02516e-05	0.997364	0.275	0.161	0.139042
Helz	1.03987e-05	0.52598	0.598	0.456	0.141038
Mta3	1.05348e-05	0.630641	0.491	0.364	0.142884
Bcl2l1	1.05401e-05	0.828831	0.367	0.242	0.142955
Ddx54	1.05446e-05	0.481424	0.639	0.506	0.143016
Bcl2a1d	1.06379e-05	1.40837	0.116	0.04	0.144282
Plagl2	1.06665e-05	0.749744	0.39	0.259	0.14467
Ddah2	1.0695e-05	0.793672	0.353	0.221	0.145057
Atp6v0d1	1.07521e-05	0.424615	0.656	0.518	0.14583
Srp19	1.11183e-05	-0.329925	0.806	0.888	0.150798
Slc37a1	1.14085e-05	1.3617	0.113	0.038	0.154733
Il4ra	1.15741e-05	0.929204	0.22	0.112	0.156979
Polb	1.16659e-05	0.640568	0.491	0.345	0.158224
Lsm2	1.17529e-05	-0.379337	0.668	0.807	0.159404
Galnt2	1.18752e-05	1.09298	0.237	0.13	0.161064
Pdcd6ip	1.22295e-05	0.428563	0.685	0.561	0.165869
Pip5k1c	1.23497e-05	0.779317	0.324	0.197	0.167499
Chic2	1.25406e-05	0.471223	0.538	0.39	0.170089
Eif2s1	1.27753e-05	-0.335082	0.763	0.862	0.173271
Ubald1	1.31921e-05	0.646576	0.451	0.318	0.178924
Sdf2	1.32128e-05	0.51685	0.564	0.418	0.179205
Ctsd	1.3224e-05	0.310001	0.879	0.834	0.179358
Rsl1d1	1.32432e-05	-0.359055	0.679	0.812	0.179617
Wbp1	1.32474e-05	0.588518	0.564	0.434	0.179675
Tasp1	1.33174e-05	0.779503	0.376	0.249	0.180624
Tmc6	1.33453e-05	0.718234	0.405	0.275	0.181002
Ube2h	1.34125e-05	0.58052	0.396	0.254	0.181913
Rab8a	1.39924e-05	0.323326	0.85	0.784	0.189779
Plac8	1.40412e-05	-0.622167	0.604	0.698	0.19044
Rbm38	1.4059e-05	0.307802	0.939	0.912	0.190682
Rapgef6	1.41396e-05	0.626492	0.535	0.428	0.191775
Frmd8	1.43182e-05	0.618558	0.468	0.34	0.194197
Isy1	1.43515e-05	0.705154	0.422	0.294	0.194649
Srgap3	1.43517e-05	0.977895	0.231	0.123	0.194653
Agtrap	1.44479e-05	0.924238	0.376	0.256	0.195957
Pdk2	1.44481e-05	1.00285	0.205	0.102	0.195959
Casp3	1.44879e-05	0.593487	0.506	0.363	0.1965
Peak1	1.45176e-05	0.971416	0.243	0.131	0.196903
Rnf167	1.4657e-05	0.529874	0.535	0.402	0.198792
Pink1	1.46806e-05	0.641669	0.471	0.34	0.199113
Kmt2d	1.47478e-05	1.05275	0.266	0.155	0.200024
Fam169b	1.47956e-05	0.495294	0.645	0.528	0.200672
Lrp10	1.513e-05	0.388829	0.725	0.608	0.205208
Arid3b	1.54615e-05	0.944425	0.249	0.136	0.209705
4932438A13Rik	1.54939e-05	0.614743	0.535	0.397	0.210144
Ahnak	1.55854e-05	-1.66471	0.069	0.166	0.211384
Tmem167	1.56172e-05	-0.369838	0.751	0.862	0.211816
Emc10	1.57123e-05	0.374163	0.85	0.789	0.213106
Polr2e	1.57465e-05	-0.462995	0.584	0.694	0.21357
Gls	1.58936e-05	0.69064	0.329	0.2	0.215564
Stx5a	1.59879e-05	0.604271	0.457	0.313	0.216843
Zc3h11a	1.60262e-05	0.9421	0.22	0.114	0.217363
Psat1	1.62488e-05	-0.467953	0.462	0.622	0.220382
Rnf2	1.62651e-05	0.534134	0.569	0.466	0.220604
Trbc1	1.63617e-05	0.56299	0.824	0.834	0.221914
Mycn	1.65636e-05	1.38325	0.127	0.048	0.224653
Slc27a1	1.70099e-05	1.12746	0.205	0.105	0.230705
Cd69	1.70958e-05	0.768029	0.277	0.162	0.23187
Nop53	1.71512e-05	0.345568	0.844	0.739	0.232621
Rnf44	1.74255e-05	0.659536	0.488	0.361	0.236342
Pdcd5	1.76953e-05	-0.297955	0.855	0.933	0.240002
Myo5b	1.79519e-05	1.3684	0.118	0.043	0.243482
Lipe	1.79899e-05	1.23875	0.13	0.05	0.243997
Mbtd1	1.79995e-05	0.603868	0.483	0.34	0.244127
Sh3gl1	1.82916e-05	0.508326	0.59	0.47	0.248089
Mmp11	1.84042e-05	1.44734	0.107	0.036	0.249616
Ndufb4	1.86287e-05	-0.313872	0.858	0.898	0.252662
Map2k5	1.88908e-05	0.485725	0.549	0.402	0.256216
Polr2f	1.90161e-05	-0.402639	0.656	0.796	0.257915
Etv3	1.91818e-05	0.720877	0.379	0.25	0.260162
Setd1b	1.95577e-05	0.733141	0.312	0.188	0.265261
Pcf11	1.9653e-05	0.594801	0.512	0.383	0.266553
Cdyl2	1.99192e-05	1.42729	0.11	0.038	0.270164
Cdk2ap2	2.00748e-05	-0.311204	0.957	0.981	0.272275
Ece1	2.00962e-05	1.09238	0.176	0.083	0.272565
Txndc17	2.03364e-05	-0.389456	0.587	0.712	0.275822
Pitpnm2	2.0403e-05	1.16337	0.188	0.092	0.276725
Rpl18	2.04455e-05	-0.0902263	1	1	0.277303
Mdm2	2.04767e-05	0.588394	0.497	0.359	0.277725
Actr1b	2.07716e-05	0.622497	0.497	0.371	0.281726
Il18rap	2.07986e-05	-1.77178	0.049	0.136	0.282091
Pdpk1	2.09997e-05	0.803454	0.341	0.219	0.284818
Plekha5	2.10323e-05	0.718945	0.266	0.149	0.285261
Tsg101	2.14158e-05	0.368935	0.621	0.449	0.290463
Pld4	2.18132e-05	0.896142	0.24	0.131	0.295852
Nsun4	2.19735e-05	1.01288	0.191	0.093	0.298027
Nfkbiz	2.25948e-05	1.20222	0.191	0.095	0.306453
Aldoa	2.29231e-05	-0.191989	0.997	1	0.310906
Laptm5	2.29977e-05	0.214303	1	1	0.311918
Chd2	2.30594e-05	0.517825	0.535	0.394	0.312755
Nme3	2.3062e-05	1.55638	0.124	0.048	0.31279
Fmnl1	2.33052e-05	0.368313	0.87	0.843	0.316088
Phlda1	2.33814e-05	1.14055	0.156	0.069	0.317122
Lsm3	2.353e-05	-0.369828	0.731	0.862	0.319138
Cers4	2.40694e-05	0.857351	0.251	0.138	0.326453
Ctsw	2.42066e-05	-0.543068	0.483	0.625	0.328315
Zfp62	2.42253e-05	0.683203	0.335	0.209	0.328568
Snx1	2.44583e-05	0.520896	0.587	0.482	0.331727
Klhl24	2.45298e-05	0.574192	0.416	0.275	0.332698
Hdac3	2.45529e-05	0.46501	0.523	0.37	0.333011
Hnrnph3	2.47773e-05	0.62461	0.436	0.307	0.336055
Eef1b2	2.54087e-05	-0.126006	1	1	0.344618
Nt5c3	2.56379e-05	0.726113	0.361	0.235	0.347727
Dynlt1a	2.59072e-05	1.44323	0.121	0.047	0.351379
Psmb10	2.61183e-05	-0.382928	0.699	0.843	0.354243
Lasp1	2.61475e-05	0.439348	0.668	0.537	0.354639
Pigs	2.62221e-05	0.59595	0.422	0.288	0.35565
Tram1	2.62334e-05	0.445004	0.627	0.504	0.355804
Sms	2.63285e-05	-0.403172	0.535	0.686	0.357093
Kdm4a	2.66207e-05	0.711597	0.358	0.233	0.361057
Zbp1	2.66422e-05	-0.909916	0.171	0.29	0.361348
Eloc	2.6817e-05	-0.304905	0.879	0.926	0.363719
Tacc2	2.73754e-05	0.720423	0.277	0.159	0.371293
Atp5d	2.76879e-05	-0.167967	1	0.998	0.375531
Dennd6a	2.76936e-05	1.0849	0.191	0.095	0.375609
Nudc	2.80628e-05	-0.302952	0.812	0.903	0.380616
Trbc2	2.86177e-05	0.591318	0.913	0.896	0.388142
Tipin	2.88277e-05	-0.313062	0.561	0.767	0.390991
Ppp1r18	2.89061e-05	0.274124	0.968	0.927	0.392053
Hs6st1	2.92585e-05	1.04468	0.257	0.15	0.396833
Ubb	2.99313e-05	0.171361	1	1	0.405958
Nmt1	3.04767e-05	0.546696	0.474	0.337	0.413355
Ctss	3.05027e-05	-1.77747	0.046	0.13	0.413708
Ppp1r12a	3.06057e-05	0.548562	0.645	0.579	0.415105
Atxn7l3b	3.0863e-05	0.303132	0.887	0.822	0.418595
Ndufa5	3.08646e-05	-0.361117	0.775	0.834	0.418617
Ttc3	3.11386e-05	0.38723	0.714	0.618	0.422333
Bcl2a1b	3.19296e-05	1.10125	0.191	0.095	0.433061
Ldhd	3.19401e-05	1.40719	0.153	0.069	0.433204
Fkbp3	3.212e-05	-0.27865	0.939	0.96	0.435643
Rtf2	3.21869e-05	0.416217	0.659	0.535	0.43655
Rnf138	3.22485e-05	0.582327	0.5	0.371	0.437386
Kctd12	3.25867e-05	0.705702	0.35	0.226	0.441973
Jup	3.29896e-05	1.11783	0.168	0.079	0.447438
Ogt	3.31522e-05	0.527718	0.566	0.432	0.449644
Aprt	3.31677e-05	-0.341862	0.884	0.915	0.449854
Phactr4	3.32268e-05	1.06053	0.185	0.092	0.450656
Zfp87	3.33356e-05	1.11583	0.182	0.09	0.452131
Syngr1	3.34498e-05	0.742791	0.246	0.135	0.45368
Atp5g2	3.42813e-05	-0.15605	1	1	0.464958
Eefsec	3.44173e-05	0.565004	0.546	0.434	0.466801
Rps20	3.50608e-05	-0.0818302	1	1	0.47553
Tecr	3.5077e-05	0.221735	0.983	0.986	0.475749
Cd84	3.51873e-05	0.610966	0.5	0.378	0.477246
Atp2c1	3.58308e-05	0.848144	0.292	0.181	0.485973
Ifi47	3.58695e-05	-0.710574	0.168	0.282	0.486498
Selplg	3.65759e-05	0.22056	0.994	0.986	0.496079
Ppp3r1	3.69654e-05	0.750784	0.355	0.233	0.501362
Cox14	3.77402e-05	-0.361807	0.705	0.798	0.511871
Calcoco1	3.78399e-05	0.930995	0.263	0.155	0.513223
Csnk1d	3.81026e-05	0.409623	0.572	0.428	0.516786
Cfl2	3.82728e-05	0.713247	0.315	0.195	0.519095
Ptprs	3.87116e-05	0.437499	0.645	0.535	0.525046
Esyt1	3.88143e-05	-0.51475	0.5	0.611	0.526438
Prkab1	3.98775e-05	0.688571	0.422	0.302	0.540859
Gpsm1	4.0106e-05	1.16502	0.153	0.069	0.543958
Kat6a	4.02869e-05	0.661261	0.35	0.225	0.546412
Ywhab	4.04094e-05	0.282082	0.945	0.893	0.548072
Gzma	4.1092e-05	-0.278414	0.908	0.957	0.557331
Sox12	4.11233e-05	1.15783	0.139	0.059	0.557755
Timp2	4.11506e-05	0.434524	0.613	0.468	0.558126
1810022K09Rik	4.16443e-05	-0.327817	0.78	0.867	0.564822
Qrich1	4.18396e-05	0.557759	0.488	0.371	0.567471
Tcn2	4.18772e-05	1.10297	0.191	0.098	0.56798
Rnf187	4.30288e-05	0.249682	0.96	0.921	0.5836
Itgal	4.3497e-05	0.279121	0.928	0.867	0.58995
Cdv3	4.43618e-05	-0.655758	0.382	0.496	0.60168
Vav2	4.45754e-05	1.30222	0.127	0.052	0.604576
Nutf2	4.46073e-05	-0.332966	0.795	0.895	0.605008
Snx18	4.47528e-05	1.13183	0.214	0.117	0.606982
Grap2	4.53558e-05	0.404098	0.728	0.629	0.615161
Ccdc93	4.54356e-05	0.826207	0.208	0.109	0.616243
Lig1	4.55088e-05	-0.243704	0.399	0.582	0.617236
Spns1	4.57333e-05	0.549386	0.439	0.306	0.620281
Rhoa	4.66357e-05	0.186116	1	0.997	0.632521
Hnrnpd	4.66495e-05	-0.34391	0.679	0.81	0.632707
Ube2c	4.67563e-05	0.381836	0.318	0.504	0.634156
Ndufv2	4.70375e-05	-0.261522	0.913	0.959	0.63797
Bola2	4.70861e-05	-0.423859	0.465	0.61	0.638629
Nfatc2	4.73438e-05	0.803674	0.257	0.149	0.642123
Ldhb	4.79223e-05	0.336587	0.818	0.706	0.64997
Agpat3	4.80271e-05	0.567315	0.512	0.387	0.651391
Mcrip1	4.82327e-05	0.323415	0.757	0.658	0.654181
Zbed4	4.84079e-05	0.742791	0.263	0.152	0.656557
Alyref	4.85872e-05	-0.479601	0.436	0.57	0.658989
Grina	4.86937e-05	0.645623	0.422	0.297	0.660433
Lrrc17	4.96756e-05	0.801287	0.266	0.154	0.67375
Kmt2e	5.00364e-05	0.367416	0.772	0.658	0.678644
Phf1	5.06017e-05	0.951738	0.214	0.116	0.686311
Smg1	5.14844e-05	0.467157	0.5	0.364	0.698283
Sidt2	5.19973e-05	0.55586	0.465	0.332	0.70524
Srsf4	5.2131e-05	0.509021	0.587	0.473	0.707053
Tspan32	5.23758e-05	-1.01905	0.133	0.242	0.710373
Dgcr6	5.27099e-05	0.400872	0.639	0.501	0.714905
Matk	5.32608e-05	0.799747	0.295	0.181	0.722376
Snrpc	5.39079e-05	-0.311429	0.824	0.926	0.731153
Galnt6	5.40571e-05	0.852845	0.301	0.192	0.733177
Rinl	5.412e-05	0.305927	0.864	0.831	0.734029
Plekhg2	5.41238e-05	0.576913	0.434	0.304	0.734081
Uhrf1	5.46706e-05	-0.299681	0.546	0.703	0.741498
Arhgef10	5.47343e-05	1.09827	0.197	0.104	0.742361
Brd3	5.49927e-05	0.423331	0.705	0.61	0.745865
1600014C10Rik	5.50348e-05	0.73301	0.309	0.193	0.746437
Nabp1	5.50692e-05	0.83491	0.217	0.116	0.746904
Sh3bp1	5.51728e-05	0.568159	0.457	0.335	0.748308
Irf7	5.55583e-05	-1.24403	0.098	0.197	0.753537
Ppp1r16b	5.69458e-05	0.562219	0.462	0.333	0.772356
Peli1	5.72391e-05	0.61726	0.428	0.307	0.776334
Slc38a2	5.7381e-05	0.401498	0.818	0.743	0.778258
Notch1	5.74089e-05	0.815855	0.309	0.195	0.778637
Fam103a1	5.7591e-05	0.420032	0.575	0.432	0.781107
Actr2	5.78228e-05	-0.431281	0.581	0.684	0.78425
Smad5	5.85383e-05	0.811271	0.298	0.185	0.793956
Aco2	5.8585e-05	0.424583	0.659	0.549	0.794589
Rbx1	5.88921e-05	-0.213875	0.971	0.993	0.798754
Tmem181a	5.89859e-05	0.752916	0.295	0.183	0.800025
Mocs2	5.91006e-05	0.536817	0.399	0.273	0.801582
Lrrfip1	5.93583e-05	-0.634939	0.254	0.378	0.805076
Gstt2	5.94899e-05	0.619643	0.37	0.247	0.806861
Qtrt1	5.957e-05	0.678182	0.292	0.174	0.807948
Slc35c1	6.00264e-05	0.51816	0.39	0.257	0.814138
Selenoh	6.08499e-05	-0.287362	0.954	0.967	0.825308
Chd7	6.21465e-05	0.500393	0.569	0.456	0.842894
Rpl6	6.24223e-05	-0.0843264	1	1	0.846633
Tapt1	6.25496e-05	0.877092	0.275	0.168	0.848361
Ap3b1	6.28107e-05	0.468702	0.529	0.406	0.851902
Luc7l2	6.47962e-05	0.27908	0.893	0.864	0.878831
Acat2	6.49841e-05	0.918641	0.254	0.152	0.881379
Rbbp7	6.52315e-05	-0.280625	0.855	0.938	0.884735
Retreg1	6.54986e-05	0.653665	0.367	0.245	0.888357
Man2a1	6.56488e-05	0.757742	0.24	0.135	0.890394
Ddr1	6.58827e-05	1.32775	0.127	0.054	0.893567
Stoml1	6.65431e-05	1.05829	0.139	0.06	0.902524
Trp53inp1	6.65613e-05	0.583964	0.402	0.275	0.902772
Dusp6	6.68005e-05	0.817753	0.191	0.097	0.906015
Zfp931	6.68124e-05	0.996548	0.211	0.114	0.906176
Srm	6.6984e-05	-0.405876	0.529	0.677	0.908504
Cep250	6.86522e-05	0.723555	0.303	0.19	0.931129
Lgmn	6.89673e-05	-1.24472	0.069	0.159	0.935403
Mdfi	6.90201e-05	1.38022	0.127	0.054	0.93612
Celf2	6.96009e-05	0.336087	0.853	0.848	0.943997
Cerk	6.9964e-05	0.600237	0.52	0.406	0.948922
Mrps21	7.02216e-05	-0.292016	0.905	0.938	0.952415
Rpl23	7.05408e-05	-0.078884	1	1	0.956744
Fgfr1op2	7.1021e-05	0.370603	0.743	0.641	0.963258
Psmd7	7.112e-05	-0.335909	0.723	0.817	0.9646
Trak1	7.119e-05	0.832989	0.225	0.123	0.96555
Ndufc1	7.11912e-05	-0.276305	0.87	0.941	0.965566
Pla2g12a	7.16819e-05	0.648399	0.46	0.344	0.972222
Slc35b3	7.22874e-05	0.71914	0.26	0.152	0.980434
Arhgap15	7.24704e-05	0.476939	0.538	0.418	0.982916
Mex3a	7.31657e-05	0.622497	0.405	0.278	0.992346
Tpra1	7.34286e-05	0.798934	0.266	0.161	0.995912
Rabl2	7.3571e-05	0.822645	0.266	0.159	0.997843
Dusp10	7.36387e-05	1.26362	0.13	0.055	0.998761
Pcmtd2	7.39292e-05	0.829669	0.298	0.188	1
Gm5914	7.46661e-05	0.700971	0.39	0.271	1
Akap2	7.59901e-05	1.0323	0.133	0.057	1
Stk24	7.64224e-05	0.324332	0.803	0.699	1
Cyfip2	7.65133e-05	0.451686	0.656	0.528	1
Scaf8	7.72558e-05	0.470136	0.488	0.359	1
Spc24	7.72928e-05	-0.188206	0.315	0.494	1
Psen2	7.74459e-05	0.722033	0.277	0.166	1
Rpl23a	7.76237e-05	-0.161349	1	1	1
Sf1	7.79906e-05	0.272411	0.89	0.862	1
Rnf157	7.82394e-05	1.45328	0.116	0.047	1
Rps19	7.8401e-05	-0.0850026	1	1	1
Cct8	7.896e-05	-0.263752	0.925	0.969	1
Polr1d	7.96013e-05	-0.208688	0.991	0.995	1
Dhcr24	7.96576e-05	0.391419	0.575	0.444	1
Pno1	8.10301e-05	-0.81495	0.237	0.345	1
Snn	8.14191e-05	0.998048	0.22	0.124	1
Mrpl30	8.27039e-05	-0.28556	0.939	0.948	1
Prkca	8.33144e-05	0.705121	0.353	0.24	1
Zbtb20	8.35384e-05	0.809906	0.194	0.1	1
Dcun1d1	8.36831e-05	0.731985	0.277	0.168	1
Tspyl1	8.42029e-05	0.567295	0.393	0.271	1
Wwp2	8.42347e-05	0.558135	0.471	0.344	1
Pgap3	8.4374e-05	0.878446	0.188	0.097	1
Gmeb2	8.44287e-05	1.09643	0.156	0.074	1
Ndufa1	8.51221e-05	-0.440666	0.922	0.957	1
Cdc42	8.73603e-05	-0.204181	0.991	0.998	1
Clasrp	8.76512e-05	0.717256	0.329	0.218	1
Eps15l1	8.78357e-05	0.447886	0.405	0.271	1
Atf6	8.84079e-05	0.643616	0.431	0.325	1
Ppp6r1	8.84787e-05	0.637438	0.439	0.323	1
Vps37b	8.87317e-05	0.700563	0.376	0.261	1
Wdtc1	8.92654e-05	0.742791	0.283	0.176	1
Senp7	8.99941e-05	0.696249	0.422	0.311	1
Dis3l2	9.12242e-05	0.940237	0.199	0.107	1
Zfp157	9.27695e-05	0.861436	0.228	0.13	1
Icam1	9.27899e-05	0.859605	0.306	0.197	1
Ube2e1	9.28505e-05	0.323273	0.766	0.701	1
Tmem131	9.30525e-05	0.727525	0.353	0.238	1
Mgst2	9.465e-05	0.683629	0.37	0.256	1
Chordc1	9.50888e-05	0.365969	0.708	0.577	1
Gba2	9.56118e-05	0.893351	0.249	0.147	1
Tmem87a	9.60419e-05	0.863646	0.246	0.143	1
Rai1	9.67666e-05	0.66724	0.361	0.247	1
Ptbp3	9.69436e-05	0.346512	0.763	0.668	1
Zmynd8	9.81257e-05	0.448104	0.471	0.34	1
Gpbp1	9.9481e-05	0.547067	0.529	0.423	1
Eif4h	9.95933e-05	0.255905	0.908	0.846	1
Kctd3	0.000100299	1.26217	0.113	0.045	1
Aff3	0.000101084	1.05998	0.159	0.078	1
Itm2c	0.000101516	0.591586	0.361	0.242	1
Ostm1	0.000102503	0.706265	0.26	0.154	1
Cpne1	0.000103438	1.07839	0.136	0.06	1
Pabpc4	0.000104125	0.539135	0.477	0.356	1
Ddx3y	0.000104219	0.482308	0.486	0.352	1
Lypla1	0.000104765	0.625554	0.373	0.257	1
Top2a	0.000105543	-0.0740239	0.532	0.708	1
Araf	0.000105552	0.68329	0.364	0.25	1
Arpp19	0.000105941	-0.284817	0.884	0.94	1
Ppdpf	0.000106727	0.30279	0.884	0.841	1
Inpp5d	0.00010727	0.529985	0.497	0.385	1
Wasl	0.00010743	0.489927	0.483	0.351	1
Gm29017	0.000107645	1.2326	0.13	0.057	1
Tfcp2	0.00010829	1.31108	0.107	0.041	1
Ikbip	0.00010877	1.31216	0.107	0.041	1
Shmt2	0.0001093	-0.449257	0.468	0.598	1
Zfp385a	0.000109724	0.90199	0.159	0.076	1
Als2	0.000109939	0.685889	0.327	0.214	1
Zc3h3	0.000110346	0.901489	0.217	0.121	1
Nsd1	0.000110354	0.409987	0.59	0.439	1
Zfp707	0.000111044	0.79226	0.214	0.117	1
Ube2d2a	0.000111078	0.248264	0.957	0.91	1
Ptpn23	0.000113124	1.0011	0.15	0.071	1
Hdac5	0.000113844	1.04235	0.15	0.071	1
Mocs1	0.000114917	0.897514	0.234	0.136	1
2610008E11Rik	0.000115284	0.97161	0.165	0.081	1
Rwdd1	0.000117385	-0.29559	0.783	0.87	1
Sdcbp	0.000118025	0.340062	0.775	0.686	1
Zbtb17	0.00011995	0.694536	0.298	0.188	1
Cyth1	0.000120341	0.486952	0.595	0.478	1
Itpr2	0.000120691	0.566814	0.364	0.242	1
Dpm2	0.000121115	-0.621262	0.318	0.435	1
Ebna1bp2	0.0001225	-0.48206	0.532	0.655	1
Cln6	0.000123798	0.827325	0.266	0.164	1
Odc1	0.000124659	-0.522964	0.436	0.549	1
Fbl	0.000124963	-0.275824	0.864	0.933	1
Egr1	0.000125845	1.09071	0.188	0.1	1
Dusp5	0.000126585	0.560506	0.471	0.358	1
Vps36	0.00012696	-0.404886	0.529	0.641	1
Clstn3	0.000127538	1.08675	0.145	0.067	1
Msmo1	0.000127732	0.657675	0.309	0.195	1
Mef2d	0.000128176	0.624828	0.408	0.294	1
Oaf	0.00013108	-0.566537	0.335	0.447	1
Eif3g	0.000134643	-0.331906	0.601	0.732	1
Ktn1	0.00013529	0.614916	0.364	0.252	1
Ndufv3	0.00013606	-0.171479	0.997	0.995	1
Leng9	0.000136101	1.11052	0.104	0.04	1
Fam168a	0.000137413	0.897301	0.249	0.15	1
Rpl22	0.000138472	-0.109092	1	1	1
Hells	0.000138495	-0.373954	0.39	0.542	1
Rbl2	0.000139204	0.473505	0.526	0.394	1
Naa10	0.000139375	0.537972	0.436	0.314	1
Rpa3	0.000140081	-0.379654	0.601	0.727	1
Agl	0.000140781	1.04618	0.142	0.066	1
Immt	0.00014216	0.385305	0.702	0.592	1
Atg4d	0.000142319	0.683203	0.332	0.225	1
Cox20	0.000143228	-0.443909	0.462	0.585	1
Sugp1	0.000144911	0.484994	0.402	0.271	1
Csk	0.000145193	0.274822	0.971	0.929	1
Arrb2	0.000145518	-0.316533	0.737	0.829	1
Ntrk3	0.000146479	1.09329	0.199	0.111	1
Cox6b1	0.000146857	-0.169382	0.997	1	1
Zfp821	0.0001481	0.742791	0.243	0.142	1
Dnaja1	0.000148787	-0.237804	0.962	0.978	1
Il2rg	0.000148826	-0.234542	0.96	0.978	1
Anp32a	0.000150949	-0.1697	0.997	1	1
Dpy19l3	0.000151063	0.930864	0.202	0.112	1
Pvr	0.000151579	1.0229	0.153	0.074	1
Tmem251	0.000152065	0.508326	0.445	0.321	1
Nedd9	0.000152267	0.686938	0.309	0.199	1
Pcmtd1	0.000152994	0.75201	0.301	0.195	1
Nap1l1	0.000153586	-0.191494	0.977	0.983	1
Lrpap1	0.00015403	0.609113	0.384	0.276	1
Nmnat1	0.000154838	1.25375	0.13	0.059	1
Slc37a3	0.000155043	0.596166	0.41	0.292	1
Fbxo27	0.000156984	0.782758	0.335	0.228	1
Ddx28	0.000157068	0.848586	0.228	0.133	1
Mrpl40	0.000157941	-0.480403	0.442	0.553	1
Golph3	0.000158014	0.651643	0.367	0.261	1
Rtp4	0.000158375	-0.994174	0.113	0.207	1
Zmiz1	0.000158552	0.473516	0.514	0.394	1
Unc13d	0.000158892	0.658258	0.405	0.295	1
Ip6k1	0.000160408	0.742791	0.286	0.181	1
Rnf43	0.000160429	-1.13435	0.118	0.211	1
Ttc14	0.000162699	0.405367	0.656	0.558	1
Csnk1e	0.000165168	0.56722	0.335	0.221	1
Gpr65	0.000167523	-0.62348	0.327	0.439	1
Rpl19	0.000167858	-0.066887	1	1	1
Hdgf	0.000168346	-0.301186	0.786	0.864	1
Csf2ra	0.000168575	0.717028	0.246	0.145	1
Akt2	0.000168593	0.463242	0.512	0.394	1
Prmt1	0.000168703	-0.235109	0.957	0.974	1
Pxn	0.000169164	0.657484	0.37	0.264	1
Map3k11	0.000170938	0.61892	0.306	0.193	1
Dek	0.000171891	-0.186513	0.806	0.905	1
Nisch	0.000173194	0.42568	0.636	0.547	1
Ndufb2	0.000173457	-0.257209	0.792	0.877	1
Lgals9	0.000173835	0.218432	0.965	0.902	1
Atic	0.00017406	-0.481769	0.46	0.565	1
Tcf20	0.00017503	0.671533	0.306	0.199	1
Atp5o.1	0.000175716	-0.194432	0.994	0.997	1
Pfn1	0.000175737	-0.0963243	1	1	1
Dlg4	0.000175748	0.652594	0.324	0.214	1
Fam122a	0.000176042	0.873495	0.26	0.164	1
Hk1	0.000176104	0.546764	0.408	0.287	1
Padi4	0.000176735	1.15783	0.113	0.047	1
Acap2	0.000178242	0.53634	0.384	0.268	1
Rbm33	0.000178269	0.535411	0.384	0.264	1
Cxxc1	0.000179256	0.469773	0.399	0.275	1
Tmx3	0.000179768	0.582327	0.353	0.238	1
Smc4	0.000180874	-0.294746	0.584	0.755	1
Vdac1	0.00018152	-0.278168	0.908	0.948	1
BC031181	0.000182726	0.319626	0.705	0.627	1
Myo18a	0.000182975	0.621867	0.344	0.23	1
Ankrd54	0.00018305	0.372769	0.468	0.333	1
Slc6a13	0.000183485	0.596364	0.477	0.377	1
Tctex1d1	0.000183715	1.47976	0.127	0.057	1
Zfp775	0.000184468	0.977257	0.159	0.079	1
Ccdc85b	0.000185685	0.59595	0.387	0.276	1
Arid1b	0.000188021	0.766061	0.266	0.166	1
Ivd	0.00019188	0.592549	0.344	0.231	1
Isg20l2	0.000193122	0.597675	0.376	0.263	1
Slc35b1	0.000193366	-0.623114	0.327	0.434	1
Nenf	0.000194667	-1.05076	0.113	0.204	1
Cdpf1	0.000195208	0.835901	0.321	0.219	1
Cbr1	0.000195831	0.538651	0.457	0.345	1
Kif5b	0.000197129	0.359654	0.656	0.551	1
Eif2s2	0.000198268	-0.268726	0.887	0.927	1
Copg1	0.000198522	0.479757	0.445	0.318	1
Kmt2c	0.000202273	0.533844	0.413	0.295	1
Ccr8	0.00020349	0.457389	0.442	0.323	1
Stau1	0.000204309	0.792119	0.26	0.161	1
Kifc5b	0.000209379	0.968673	0.159	0.079	1
Fam208a	0.000212159	0.496436	0.312	0.197	1
Cacul1	0.000213482	0.81743	0.254	0.157	1
Dnajc30	0.000213558	0.591784	0.329	0.218	1
Slc16a10	0.000213751	0.606372	0.402	0.292	1
Dapk3	0.00021384	0.39108	0.558	0.435	1
Snx6	0.000216453	0.332461	0.751	0.679	1
Pms2	0.00021878	0.574192	0.28	0.173	1
B4galt3	0.000220681	0.623739	0.237	0.138	1
Syne1	0.000221414	0.998048	0.171	0.09	1
Sh2b1	0.000221749	0.466329	0.5	0.37	1
Srpk1	0.000226221	-0.340844	0.618	0.727	1
Tmed4	0.000226608	0.474043	0.425	0.299	1
Rnf14	0.000229374	0.69907	0.277	0.174	1
S1pr1	0.000230029	-1.6666	0.04	0.109	1
Engase	0.000233727	0.609113	0.243	0.142	1
Atp6v0b	0.000236975	0.413223	0.656	0.56	1
Uvrag	0.000237841	0.461804	0.566	0.459	1
Rb1cc1	0.000238248	0.558574	0.457	0.344	1
Tespa1	0.0002395	0.335925	0.847	0.736	1
Stat1	0.000241147	-0.449854	0.572	0.672	1
Zfp865	0.000241169	0.652594	0.225	0.13	1
Son	0.000241243	0.268067	0.951	0.933	1
Psma5	0.000242326	-0.268831	0.832	0.898	1
Cacybp	0.000243895	-0.364813	0.702	0.82	1
Insig1	0.000244923	0.792717	0.275	0.176	1
Khdrbs1	0.000246022	0.244142	0.925	0.883	1
Setd7	0.000246615	0.769264	0.243	0.147	1
2010107E04Rik	0.000246977	-0.157261	1	1	1
Phf20l1	0.000247369	0.458423	0.535	0.423	1
Clec2i	0.000248418	0.730617	0.214	0.121	1
Krtcap2	0.0002494	-0.26542	0.922	0.957	1
Zfp810	0.000249825	1.25375	0.127	0.059	1
Homer2	0.000251606	-1.54999	0.049	0.121	1
Mob3c	0.000253677	1.17575	0.13	0.06	1
Tgfbr3	0.000254249	0.685458	0.303	0.197	1
Tmem39a	0.000254904	0.651161	0.266	0.164	1
Kmt2a	0.000254961	0.564843	0.439	0.326	1
Map1lc3a	0.000255613	0.73008	0.243	0.147	1
Ndufc2	0.000256191	-0.215267	0.962	0.981	1
Cflar	0.00025677	0.477618	0.52	0.408	1
Taz	0.00025722	0.54381	0.321	0.207	1
Heatr1	0.00025775	-0.959823	0.121	0.214	1
4833420G17Rik	0.000261446	0.503745	0.509	0.389	1
Ifi35	0.000263351	-0.786758	0.234	0.337	1
Tubb2a	0.000263434	0.594767	0.451	0.342	1
Lrrc41	0.000264761	0.630317	0.318	0.212	1
Sall2	0.000265171	0.916439	0.205	0.117	1
Lrrc58	0.000266285	0.453285	0.462	0.337	1
Zbtb1	0.00026782	0.468397	0.462	0.339	1
Zfp281	0.000268381	0.784311	0.275	0.178	1
Dbn1	0.000271363	0.879113	0.223	0.131	1
Wipf1	0.000272025	0.491427	0.503	0.402	1
Phf7	0.000272654	0.924995	0.136	0.064	1
Pgghg	0.000272807	0.897514	0.147	0.073	1
Tmem14c	0.000274358	-0.241922	0.867	0.94	1
Med15	0.000275829	0.533196	0.474	0.366	1
Atl2	0.000278204	0.594893	0.332	0.219	1
Ppan	0.000278379	-0.579137	0.35	0.458	1
Ciz1	0.000279261	0.652026	0.329	0.223	1
Ripor1	0.000279946	0.548912	0.312	0.197	1
Ppp1r35	0.000282154	0.357651	0.665	0.56	1
Ncbp1	0.000283566	0.418494	0.578	0.466	1
Fnip1	0.000283687	0.99863	0.173	0.093	1
Taf1c	0.000291078	0.849707	0.263	0.169	1
Vars2	0.000292244	0.731651	0.275	0.176	1
Traf6	0.000294885	0.657544	0.266	0.166	1
Apol7e	0.000294978	1.34069	0.118	0.054	1
Xrcc1	0.000295329	0.473605	0.399	0.276	1
Map1lc3b	0.000295757	0.266988	0.879	0.822	1
Dock8	0.000296113	0.407188	0.59	0.47	1
9530077C05Rik	0.00029779	1.20222	0.11	0.047	1
Mrpl17	0.000298644	-0.334568	0.523	0.668	1
Nono	0.000304421	0.194161	0.991	0.965	1
Fcf1	0.000305625	-0.386086	0.483	0.617	1
Zfand3	0.000306618	0.641253	0.37	0.266	1
Dpf2	0.000307093	0.432004	0.601	0.515	1
Hjurp	0.000308338	0.550788	0.419	0.316	1
Fxr1	0.000308999	0.475311	0.46	0.342	1
Ddost	0.000309683	-0.261671	0.879	0.921	1
Clint1	0.000310518	0.503911	0.465	0.349	1
Ppp2r5e	0.000313592	0.679015	0.327	0.226	1
Hivep2	0.000314338	0.522192	0.257	0.155	1
Plscr3	0.000315735	0.41799	0.512	0.385	1
Cops9	0.000315739	-0.208001	0.91	0.926	1
Pex19	0.000315742	0.573815	0.353	0.245	1
Iqce	0.00031694	0.997364	0.162	0.085	1
Ctxn1	0.000317586	0.659536	0.217	0.124	1
Ywhaz	0.000317799	0.151449	1	1	1
Nipsnap2	0.000317973	0.985152	0.205	0.121	1
Fubp3	0.000318888	0.890348	0.159	0.081	1
Zscan2	0.000320746	0.635151	0.283	0.181	1
Ccdc84	0.000322674	0.776344	0.208	0.119	1
Itgb1	0.000322803	0.503453	0.471	0.361	1
Cstf2t	0.000323048	0.669329	0.272	0.173	1
Mief2	0.000327369	1.10957	0.124	0.057	1
Zfp574	0.000330197	0.808679	0.243	0.15	1
Aqp3	0.000331995	-0.956127	0.147	0.242	1
Anxa5	0.000333042	0.581202	0.436	0.33	1
Junb	0.000334542	0.421672	0.462	0.359	1
Ero1lb	0.000335379	1.10536	0.136	0.066	1
Calm2	0.000335744	0.225842	0.951	0.934	1
Spred2	0.000335844	0.907422	0.211	0.124	1
Bag6	0.00033684	0.406336	0.604	0.494	1
Ino80b	0.000340781	0.648748	0.361	0.261	1
Tob2	0.000344331	0.724413	0.312	0.211	1
Mlf2	0.000346031	0.275012	0.853	0.798	1
Ubqln1	0.000350465	0.447035	0.546	0.453	1
Wrnip1	0.000351702	0.521376	0.41	0.297	1
Bri3	0.000354455	0.412537	0.532	0.415	1
Klc4	0.000360425	1.14805	0.118	0.054	1
Ly6g5b	0.000361948	1.13398	0.162	0.086	1
Hnrnpa3	0.000362241	-0.116946	1	1	1
Rnpepl1	0.000365663	0.482402	0.361	0.244	1
Cep131	0.000368654	0.969067	0.147	0.074	1
Zmym5	0.00037079	0.440431	0.382	0.264	1
Tstd2	0.00037232	0.802292	0.223	0.133	1
Rag2	0.000376058	1.31703	0.104	0.043	1
Sirt5	0.000376117	0.742791	0.223	0.133	1
Asb8	0.00038039	0.83855	0.234	0.143	1
Paip1	0.000380527	0.947611	0.147	0.074	1
Riok3	0.000380847	0.480518	0.503	0.397	1
Rbm22	0.000381465	0.397437	0.526	0.399	1
Snx15	0.000382621	0.586672	0.246	0.149	1
Fam129a	0.000386017	-0.532722	0.399	0.492	1
Baiap3	0.000389146	1.14615	0.159	0.085	1
Ssbp1	0.000396112	-0.311941	0.566	0.693	1
Dnlz	0.000397968	0.429502	0.494	0.368	1
Jmjd6	0.000398679	0.507771	0.454	0.349	1
Hdac2	0.000399252	0.358127	0.702	0.625	1
Rps12	0.000404209	-0.0819845	1	1	1
Cfap43	0.00040527	0.825253	0.205	0.119	1
Tbc1d9b	0.000406118	0.589839	0.309	0.206	1
Fignl1	0.00040765	-0.872386	0.139	0.233	1
BC017643	0.000408268	0.538962	0.434	0.321	1
Rfx7	0.000408871	0.687296	0.303	0.206	1
Rps8	0.00041116	-0.0678558	1	1	1
Hist1h2bj	0.000411245	-0.424874	0.249	0.371	1
Mrgbp	0.000415153	0.464365	0.416	0.299	1
AI467606	0.000415726	0.375836	0.671	0.573	1
Smim3	0.000415814	0.95852	0.165	0.088	1
Strn4	0.000417517	0.379493	0.445	0.321	1
Mtss1	0.000420075	0.694697	0.246	0.152	1
Icos	0.00042866	-0.537057	0.451	0.553	1
E2f4	0.000430567	0.433587	0.587	0.496	1
Nelfcd	0.000432887	0.492524	0.428	0.326	1
Mfap1a	0.000436904	0.586672	0.419	0.314	1
Naa40	0.000437707	0.662009	0.358	0.256	1
Ccdc92	0.000437936	0.794322	0.139	0.067	1
Itpr1	0.000441402	-0.787723	0.246	0.34	1
Pld3	0.000441551	0.420154	0.578	0.475	1
Actr10	0.000448209	0.334392	0.749	0.66	1
Cmtm6	0.000449488	0.481463	0.491	0.383	1
Tubb2b	0.000450108	0.641371	0.549	0.47	1
Smim19	0.000452909	0.5112	0.402	0.285	1
Nelfa	0.000454113	0.488474	0.46	0.344	1
Klhl20	0.000455329	0.855266	0.179	0.098	1
Gm9844	0.000455355	-0.504002	0.358	0.459	1
Phpt1	0.000455863	0.755615	0.249	0.157	1
Tax1bp3	0.000457306	0.58882	0.468	0.371	1
Kcnip2	0.000461408	1.12808	0.139	0.069	1
Max	0.000461978	0.36428	0.529	0.404	1
Dot1l	0.000466286	0.553314	0.344	0.237	1
Fbxw11	0.000468867	0.892169	0.251	0.162	1
Hist1h1b	0.00046918	-0.0414069	0.448	0.596	1
Amn1	0.000470024	0.907851	0.173	0.095	1
Bax	0.00047328	0.417372	0.766	0.713	1
Polr3k	0.000477301	0.332636	0.656	0.547	1
Atf2	0.000479264	0.60673	0.338	0.233	1
Rnf170	0.000479588	1.0323	0.127	0.06	1
Zfand1	0.000481473	0.69587	0.263	0.168	1
Med10	0.000482631	0.311508	0.708	0.648	1
Rab10os	0.000483418	0.53312	0.355	0.249	1
Klc1	0.000483541	0.630582	0.289	0.187	1
Zfp141	0.000486565	1.3575	0.104	0.045	1
Ing2	0.00048713	0.517079	0.28	0.176	1
Rfng	0.000488968	0.742791	0.22	0.131	1
Dnajc15	0.000490246	-0.535884	0.416	0.515	1
Ldb1	0.000495275	0.33886	0.656	0.547	1
Ppp1ca	0.000495653	-0.139647	1	1	1
March5	0.000505933	0.403161	0.529	0.411	1
Slc3a2	0.000506844	0.39153	0.564	0.461	1
Rgs12	0.000508017	0.710001	0.197	0.112	1
Lrch1	0.000509636	0.615556	0.292	0.193	1
Ndufs7	0.000512053	-0.277537	0.803	0.865	1
Ccnb2	0.000512428	-0.332497	0.211	0.328	1
Chd9	0.000514606	0.466933	0.48	0.366	1
Gabarap	0.000515015	0.206738	0.974	0.936	1
Mark4	0.000516544	0.67297	0.269	0.173	1
Mbd3	0.000518653	0.324329	0.668	0.566	1
Mum1	0.000520072	0.414906	0.5	0.385	1
Terf1	0.000521105	0.508326	0.396	0.278	1
Dhx8	0.000523208	0.440848	0.376	0.264	1
Rasa2	0.000524891	0.387526	0.512	0.392	1
Rhoh	0.000528705	0.228081	0.899	0.877	1
Cbfa2t2	0.000533415	0.825253	0.182	0.102	1
Agap2	0.000534743	0.650279	0.298	0.199	1
Crtc3	0.000537757	0.41333	0.587	0.485	1
4833439L19Rik	0.000538697	0.571746	0.306	0.206	1
Isg15	0.000541297	-1.11793	0.145	0.233	1
Tcp11l2	0.000542426	0.88887	0.24	0.154	1
Gm45051	0.000544894	0.901053	0.176	0.098	1
Sec11a	0.000545393	-0.322045	0.746	0.819	1
Bnip3l	0.000546433	0.29644	0.789	0.737	1
Arhgap1	0.000547489	0.489217	0.445	0.339	1
Bptf	0.00054819	0.367482	0.616	0.492	1
Irgm1	0.000553034	-0.533067	0.179	0.278	1
Mrpl36	0.000553216	-0.31785	0.601	0.717	1
Mrpl54	0.000553938	-0.272242	0.847	0.902	1
Klhl25	0.000556463	0.61726	0.289	0.192	1
Wsb1	0.00055811	0.518526	0.413	0.309	1
Sp140	0.00055873	0.839467	0.214	0.128	1
Rpl36a	0.000564369	-0.0889714	1	1	1
Zgpat	0.000565327	0.465496	0.341	0.23	1
Mboat7	0.000567669	0.474539	0.419	0.311	1
Gmeb1	0.000572719	0.432689	0.382	0.263	1
Dnajc2	0.000573309	-0.291271	0.734	0.831	1
Drc1	0.000575077	0.759764	0.275	0.18	1
Zfp592	0.000583569	0.550146	0.298	0.195	1
Ppp3ca	0.000589886	0.457389	0.48	0.382	1
Jmjd1c	0.000593431	0.461669	0.454	0.345	1
Dlst	0.000594285	0.486195	0.445	0.344	1
Fzr1	0.0005943	0.514645	0.436	0.335	1
9930012K11Rik	0.00060367	0.904542	0.159	0.085	1
Tsc2	0.000603968	0.628459	0.228	0.138	1
Mbtps2	0.000605442	1.14013	0.127	0.062	1
Ccnt2	0.000608319	0.472551	0.431	0.316	1
Gm16286	0.000610105	0.36605	0.63	0.525	1
Nr1h2	0.000610201	0.396937	0.512	0.404	1
Ddx21	0.000614131	-0.409912	0.471	0.589	1
Nprl2	0.000614677	0.608306	0.344	0.244	1
Gtf2ird1	0.000616416	0.624147	0.295	0.197	1
Mplkip	0.000616677	0.328565	0.645	0.534	1
Dusp11	0.000620256	0.383418	0.647	0.566	1
Ctnnbip1	0.000622213	0.657902	0.266	0.173	1
Creb3	0.000622772	0.472952	0.324	0.218	1
Pex6	0.000623232	0.539538	0.439	0.347	1
Mrpl51	0.000625013	-0.372052	0.552	0.651	1
Appbp2	0.000626824	0.45189	0.387	0.28	1
Trim35	0.000628787	0.452589	0.552	0.453	1
Denr	0.000633761	-0.281759	0.656	0.746	1
Kmt5b	0.000634509	0.799822	0.254	0.166	1
Gm11695	0.000637884	1.0323	0.104	0.045	1
Mppe1	0.000640152	0.46416	0.431	0.32	1
Spns3	0.000640269	1.05538	0.165	0.092	1
Dad1	0.000642948	-0.211877	0.96	0.96	1
B4galnt4	0.000650091	0.853823	0.22	0.135	1
Tbca	0.000651799	-0.210789	0.948	0.979	1
Psmb8	0.00065435	-0.1597	1	1	1
Dbp	0.00065461	0.811504	0.185	0.105	1
Mecp2	0.000658026	0.579293	0.257	0.162	1
2810408A11Rik	0.000661089	0.939828	0.118	0.055	1
Plcb2	0.000661963	0.842327	0.194	0.112	1
Ptgr2	0.000668438	0.742791	0.194	0.112	1
Gatsl2	0.000670311	0.908801	0.116	0.054	1
Wac	0.000674964	0.41864	0.569	0.485	1
Sbf1	0.000677387	0.476398	0.312	0.204	1
Lnpep	0.000678069	0.525693	0.413	0.309	1
Phf21a	0.000678834	0.600772	0.208	0.123	1
Sypl	0.000678969	0.461221	0.413	0.309	1
Terf2ip	0.000679669	0.52598	0.257	0.159	1
Ncoa3	0.00068425	0.634267	0.28	0.185	1
Setd5	0.000684619	0.467157	0.569	0.472	1
Foxp4	0.000686735	0.621328	0.295	0.197	1
Rpe	0.000688195	0.68921	0.329	0.24	1
Scyl1	0.000690835	0.655328	0.275	0.181	1
Zdhhc8	0.000695448	0.602614	0.301	0.202	1
Il17ra	0.000703579	0.472829	0.468	0.356	1
Rasa4	0.000703649	0.535829	0.332	0.231	1
Topbp1	0.000708823	-0.455417	0.413	0.516	1
Rplp2	0.000713762	-0.0753105	1	1	1
Trdv2-2	0.000718056	1.31425	0.283	0.2	1
Erp29	0.000723609	-0.29605	0.777	0.843	1
Paxbp1	0.000728692	0.83765	0.228	0.145	1
Rcc2	0.00073043	-0.356744	0.399	0.515	1
Ranbp1	0.000732915	-0.14311	0.896	0.969	1
Pnrc2	0.00073499	0.410758	0.497	0.396	1
Emc8	0.000736608	0.774853	0.199	0.117	1
Stard3	0.000742001	0.442213	0.367	0.254	1
Tollip	0.000744145	0.809134	0.197	0.116	1
Tsnax	0.000744907	0.383801	0.488	0.378	1
Coil	0.000745182	0.762691	0.182	0.104	1
Mcm6	0.000746947	-0.17681	0.731	0.857	1
Cnot6	0.000750307	0.43722	0.636	0.549	1
Elf2	0.00075232	0.405177	0.517	0.409	1
Tcf4	0.000755321	0.853215	0.194	0.112	1
Rpn1	0.000761176	-0.362782	0.665	0.756	1
Thy1	0.000761989	0.209223	0.997	0.997	1
Ppm1m	0.000762201	0.486777	0.246	0.152	1
Soat1	0.000771235	0.653293	0.269	0.176	1
Asxl1	0.000780204	0.53634	0.457	0.354	1
Arntl	0.00078224	0.545061	0.338	0.23	1
Fbxl20	0.000783448	0.650279	0.289	0.195	1
Skiv2l	0.000784817	0.571311	0.384	0.283	1
Nasp	0.000785064	-0.297594	0.63	0.75	1
Ubl7	0.000787123	0.38272	0.546	0.435	1
Txndc16	0.000792556	0.802912	0.214	0.131	1
Grap	0.000795814	0.413169	0.555	0.449	1
Mmd	0.000798939	0.619277	0.341	0.247	1
Gm26614	0.00080109	1.09789	0.121	0.059	1
Yif1b	0.000802999	-0.562554	0.289	0.392	1
Sec63	0.00080517	0.587055	0.35	0.252	1
Tnik	0.000809164	0.492951	0.425	0.318	1
Tbrg1	0.000814295	-0.390183	0.457	0.572	1
Mgea5	0.000815534	0.337469	0.636	0.528	1
Psmb4	0.000820413	-0.234514	0.922	0.955	1
Kat6b	0.000831486	0.729245	0.223	0.136	1
Herc2	0.000832957	0.493764	0.303	0.202	1
Hsp90ab1	0.000836648	-0.099448	1	1	1
Rpl36	0.000843684	-0.0820726	1	1	1
Prkag2	0.000849399	0.940237	0.185	0.109	1
Lztfl1	0.000849971	0.215667	0.746	0.623	1
Ttyh3	0.000851556	0.670642	0.341	0.25	1
Stk10	0.000855283	0.440229	0.512	0.404	1
Numb	0.000855659	0.628835	0.191	0.109	1
Phlda3	0.00085586	1.10892	0.121	0.059	1
Edf1	0.000857267	-0.149071	0.997	0.99	1
Nrbp1	0.000862779	0.392171	0.445	0.325	1
Wbp11	0.000867338	0.305105	0.61	0.475	1
Traf3ip3	0.000870973	0.36972	0.725	0.672	1
Fndc3a	0.000873912	0.578672	0.335	0.237	1
Dedd2	0.000877246	0.76625	0.243	0.157	1
Arid4a	0.00088086	0.373962	0.428	0.311	1
Dalrd3	0.000890718	0.516515	0.408	0.309	1
Vipas39	0.000897874	0.730917	0.251	0.164	1
Eef1e1	0.000899819	-0.44587	0.448	0.528	1
Ccdc134	0.000900486	0.784611	0.162	0.088	1
Hsbp1	0.000905117	0.273063	0.818	0.713	1
Atxn7l1	0.000905631	0.685458	0.182	0.104	1
Paf1	0.00091355	0.451136	0.384	0.269	1
Rtl8b	0.000928624	0.662173	0.205	0.123	1
Brd4	0.000928971	0.323511	0.751	0.699	1
CAAA01118383.1	0.000932179	0.648154	0.402	0.313	1
Ppme1	0.00093369	0.464075	0.295	0.193	1
Ppard	0.000935033	0.69907	0.173	0.097	1
B4gat1	0.000940468	0.668791	0.194	0.112	1
Kremen1	0.000941176	0.742791	0.24	0.154	1
Frat2	0.000945418	0.56946	0.292	0.195	1
Gngt2	0.000945883	0.458843	0.506	0.416	1
Usp21	0.000952609	0.657061	0.234	0.147	1
Lin37	0.000957667	0.409855	0.468	0.356	1
Tap2	0.000961938	0.219329	0.783	0.667	1
Nfkbil1	0.000962363	0.614277	0.332	0.235	1
Trim14	0.000969472	0.613508	0.231	0.143	1
Gga1	0.000972214	0.530872	0.329	0.23	1
Ngdn	0.000973759	0.379706	0.538	0.432	1
Fnbp1	0.000977649	0.263574	0.76	0.636	1
Adam10	0.000985923	0.534683	0.413	0.313	1
Rplp0	0.000986719	0.0578116	1	1	1
Msh6	0.000987482	0.414271	0.46	0.356	1
Pofut1	0.000991245	0.698397	0.217	0.133	1
Mcts1	0.000992785	-0.358629	0.538	0.646	1
Cnot7	0.000997538	0.465873	0.486	0.378	1
Fyn	0.000998716	0.415981	0.445	0.34	1
Sfmbt1	0.00100757	0.909901	0.15	0.081	1
St3gal4	0.00100758	0.813874	0.228	0.147	1
Eif4g3	0.00101358	0.461982	0.434	0.326	1
Mrps7	0.00102373	-0.425358	0.48	0.577	1
Fbxo44	0.00102525	0.702149	0.176	0.1	1
Mgrn1	0.00102652	0.779317	0.185	0.109	1
Brd2	0.00102683	0.249847	0.838	0.786	1
Ddx5	0.00102986	0.163966	1	0.998	1
Necap2	0.00103391	0.403305	0.405	0.292	1
Tgds	0.00103418	0.645494	0.211	0.128	1
Sumo3	0.00103428	0.518004	0.341	0.244	1
Atp11b	0.00104067	0.563157	0.344	0.244	1
Ap3s1	0.00104708	0.198146	0.971	0.936	1
Hnrnpk	0.00104715	0.132433	1	0.998	1
P2ry10	0.00104856	0.631474	0.344	0.252	1
Hist1h4d	0.001053	-0.428631	0.338	0.456	1
2900079G21Rik	0.00105454	0.778861	0.159	0.086	1
Glul	0.00108092	0.64285	0.399	0.306	1
Tcf25	0.00108537	0.275148	0.803	0.727	1
Ubr4	0.0010897	0.450728	0.393	0.288	1
B3galnt2	0.00109098	0.764486	0.165	0.092	1
Ydjc	0.00109248	-1.40921	0.046	0.107	1
Cd226	0.00109347	-1.10521	0.061	0.128	1
Gmcl1	0.00109418	0.493971	0.347	0.244	1
Gm2a	0.00109783	-0.489869	0.344	0.442	1
Tial1	0.00110608	0.40506	0.532	0.428	1
Suds3	0.00111263	0.391319	0.491	0.383	1
Snap23	0.00111321	0.490984	0.413	0.313	1
Tspan3	0.00111926	0.585822	0.347	0.25	1
Vps29	0.0011307	-0.338509	0.538	0.675	1
Tmem192	0.00113734	0.376469	0.457	0.347	1
Id2	0.0011402	0.742791	0.162	0.09	1
Comtd1	0.00115378	-0.703273	0.145	0.231	1
Nolc1	0.00115392	-0.383262	0.491	0.61	1
Orc5	0.00115527	0.780266	0.185	0.109	1
Pds5b	0.00115899	0.470419	0.321	0.219	1
Mrpl28	0.00115989	-0.383082	0.558	0.646	1
Ppox	0.00116515	0.57152	0.257	0.164	1
Nipbl	0.00117353	0.436644	0.604	0.535	1
Scai	0.0011786	0.801685	0.211	0.131	1
Paip2	0.0011816	0.188383	0.96	0.938	1
Ssb	0.00118668	-0.238712	0.882	0.926	1
Usp11	0.00118978	0.526216	0.301	0.202	1
Vps26b	0.00119409	0.456114	0.451	0.347	1
Zfp362	0.00119616	0.607862	0.309	0.216	1
Phldb3	0.00119659	0.708026	0.197	0.117	1
Plcg1	0.00119866	0.497108	0.416	0.309	1
Golga2	0.0012063	0.71073	0.205	0.124	1
Tomm40l	0.00121089	-0.842171	0.113	0.192	1
Uckl1	0.00121173	0.516283	0.228	0.14	1
Gatad2b	0.00121226	0.433786	0.514	0.423	1
Crebzf	0.00121427	0.649682	0.22	0.136	1
Tnfrsf25	0.00122044	0.263996	0.815	0.732	1
Emc9	0.00122079	-1.44308	0.055	0.117	1
Ube2l3	0.00122387	-0.243429	0.905	0.95	1
Snx13	0.0012262	1.11203	0.13	0.067	1
1700017B05Rik	0.00123689	0.455734	0.448	0.349	1
Retreg2	0.00123813	0.35736	0.532	0.43	1
Ptpn2	0.00123826	0.31113	0.665	0.547	1
Zfp148	0.00124178	0.453695	0.512	0.415	1
Slc25a4	0.00124843	0.282123	0.876	0.832	1
Pum3	0.00125328	-0.547659	0.277	0.373	1
Cox7a2l	0.00125452	0.17999	0.957	0.936	1
Mdh2	0.00126253	-0.16423	0.983	0.995	1
Snx27	0.00126268	0.709108	0.266	0.18	1
Pqlc1	0.00126532	0.887181	0.142	0.076	1
Mfsd14b	0.00127494	0.742791	0.211	0.131	1
Gm4316	0.00128416	-0.644765	0.205	0.301	1
Pigyl	0.00128622	0.368726	0.477	0.363	1
Keap1	0.00128964	0.458618	0.46	0.368	1
Gstp1	0.00129461	0.434579	1	1	1
Tfdp2	0.0012948	0.685306	0.254	0.168	1
Wdr1	0.0013171	-0.200477	0.829	0.905	1
Dhx34	0.00132052	0.695997	0.199	0.119	1
Styx	0.00135685	0.548522	0.26	0.169	1
Rbm4	0.00136336	1.17719	0.113	0.055	1
Pafah1b2	0.00136923	0.520399	0.422	0.33	1
Chp1	0.00137738	0.381335	0.5	0.399	1
Ikbkg	0.0013797	0.657902	0.168	0.095	1
Uqcrq	0.00138	0.096914	0.997	0.997	1
2510039O18Rik	0.00138406	0.45001	0.286	0.188	1
Dvl2	0.00139573	0.541651	0.286	0.192	1
Ss18	0.00139715	0.327754	0.514	0.396	1
Emilin1	0.0014049	0.788595	0.205	0.128	1
Gm6961	0.0014074	1.0291	0.113	0.055	1
Ola1	0.00141061	-0.316674	0.63	0.722	1
Gbp2	0.00141479	-1.24271	0.092	0.166	1
Sh3bp5l	0.00142004	0.76165	0.179	0.105	1
Ndufab1	0.00142234	-0.195747	0.951	0.967	1
Rpl13	0.00142687	-0.0586922	1	1	1
Cul4a	0.00142948	0.642264	0.228	0.145	1
Dnajb2	0.00143128	0.793417	0.145	0.078	1
Rab22a	0.0014356	0.560698	0.399	0.309	1
Dctn5	0.00144622	0.363043	0.5	0.383	1
Rnf169	0.00144672	0.550146	0.263	0.173	1
Tet1	0.0014594	1.16729	0.11	0.054	1
Tmem191c	0.00146452	0.672889	0.286	0.199	1
Rtn4rl1	0.00146614	0.710001	0.191	0.114	1
Pygb	0.00146713	0.53485	0.283	0.19	1
Lyar	0.00146884	-0.436606	0.428	0.534	1
Rnf31	0.00148163	0.742791	0.199	0.123	1
Arl8b	0.00148249	0.437937	0.396	0.297	1
Gm43647	0.00149343	0.755967	0.217	0.136	1
Sdf4	0.00149765	-0.264795	0.751	0.832	1
Mapk7	0.00150691	0.654564	0.225	0.143	1
Tsc22d2	0.00151167	0.795903	0.185	0.111	1
Rnf123	0.00151174	0.646115	0.223	0.14	1
Gys1	0.00151644	1.01198	0.113	0.055	1
Sf3b5	0.0015165	-0.225305	0.896	0.95	1
Slc25a23	0.00151831	0.534683	0.341	0.245	1
Zbed3	0.00152123	0.898442	0.179	0.107	1
Ggh	0.00152139	0.960971	0.136	0.073	1
Polr2m	0.00152165	0.329163	0.682	0.591	1
Rnase4	0.00152312	-1.1485	0.078	0.147	1
Slc7a6os	0.00152633	0.459719	0.309	0.212	1
Ap2a2	0.00152836	0.472525	0.39	0.292	1
Ezh1	0.00152932	0.725304	0.188	0.112	1
Ddx19b	0.00153063	0.662173	0.197	0.117	1
Smarcal1	0.00154132	0.742791	0.145	0.078	1
Hsf2	0.00155143	1.13183	0.121	0.062	1
Sf3b1	0.00155592	0.189268	0.965	0.965	1
Zfp68	0.00156524	0.602131	0.312	0.218	1
Zc3h14	0.00156643	0.38246	0.428	0.311	1
Gpr108	0.0015718	0.67297	0.243	0.159	1
Rin3	0.00157186	0.651293	0.312	0.226	1
2510002D24Rik	0.00157255	0.53485	0.286	0.193	1
Tacc1	0.00159269	0.417952	0.471	0.37	1
Srcap	0.00159353	0.571311	0.243	0.155	1
Mki67	0.00159895	-0.0651937	0.338	0.485	1
Trp53bp1	0.00161378	0.512307	0.272	0.18	1
Ndufb3	0.00161685	-0.241779	0.841	0.886	1
Caap1	0.00162971	0.604271	0.277	0.19	1
mt-Co2	0.0016298	-0.0801824	1	1	1
Myo1g	0.00163022	-0.54844	0.367	0.454	1
Rab5b	0.0016328	0.65466	0.269	0.185	1
Pomp	0.00163818	-0.135245	0.991	0.997	1
Hyal2	0.0016395	0.571311	0.251	0.164	1
Wtap	0.00164657	0.28749	0.543	0.421	1
Ikbke	0.00166014	0.463932	0.292	0.197	1
Ppp1r10	0.00166529	0.382555	0.468	0.368	1
Rlim	0.00167931	0.610206	0.344	0.257	1
Tcrg-C1	0.00168259	0.279905	0.954	0.941	1
Gm20604	0.0016894	0.927216	0.124	0.064	1
Fam173a	0.00169108	0.367282	0.555	0.461	1
Cdca7	0.00170045	-0.153586	0.445	0.603	1
Cela1	0.00170065	-0.742636	0.098	0.174	1
Dtymk	0.00170811	-0.238871	0.754	0.855	1
Rara	0.00171629	0.413189	0.5	0.404	1
Ppm1a	0.00171663	0.687825	0.22	0.14	1
Hist1h1e	0.00171955	-0.13349	0.532	0.663	1
Cbx3	0.00172556	0.232079	0.795	0.779	1
Hif3a	0.00173242	1.00059	0.121	0.062	1
Npepps	0.00173666	0.429633	0.491	0.397	1
Slamf1	0.00174045	0.416476	0.382	0.278	1
Fbxo3	0.00174674	0.557488	0.37	0.276	1
Rnf144a	0.00174691	-0.744086	0.165	0.247	1
Dctn6	0.00177303	0.310135	0.702	0.618	1
Vrk3	0.00177375	0.370626	0.552	0.44	1
Tmem176b	0.00177839	0.571311	0.182	0.107	1
Arf3	0.00178168	0.301665	0.5	0.387	1
Slc9a9	0.00178592	0.297354	0.777	0.732	1
Mff	0.00179189	0.32137	0.636	0.556	1
Pik3cg	0.00179236	0.580735	0.295	0.207	1
Nat6	0.00179521	0.874036	0.113	0.055	1
Glmp	0.00179879	0.309138	0.645	0.558	1
mt-Nd4l	0.0018021	-0.0909711	1	1	1
Zmym3	0.00180271	0.474088	0.28	0.188	1
Cdc37	0.00180417	0.184275	0.977	0.967	1
Gm16867	0.00180449	0.870547	0.142	0.078	1
Cdc23	0.00181301	0.478245	0.332	0.235	1
Slc25a11	0.00182513	0.312487	0.613	0.527	1
Mink1	0.00182802	0.642486	0.263	0.18	1
Myl12b	0.00184478	-0.180446	0.986	0.995	1
Stat5a	0.00185263	0.520399	0.298	0.206	1
Tbc1d10b	0.00185427	0.479757	0.353	0.257	1
Kcnmb4	0.00185606	0.742791	0.139	0.074	1
Lsm14b	0.001857	0.727525	0.205	0.128	1
Sptbn1	0.00186094	-0.410865	0.373	0.487	1
Cand2	0.00187569	0.872559	0.194	0.121	1
Ccdc174	0.00187615	0.35344	0.488	0.378	1
Chchd10	0.00188115	-1.12662	0.061	0.123	1
Zfp606	0.00188238	0.726113	0.194	0.119	1
Pycard	0.00188276	-0.233289	0.85	0.919	1
Ctu2	0.00188905	-0.52817	0.26	0.354	1
Hypk	0.00189359	0.465257	0.393	0.301	1
Usp9x	0.00189549	0.422494	0.364	0.261	1
Kif13b	0.0019069	0.840972	0.173	0.104	1
Plekhg3	0.00190969	0.653665	0.361	0.271	1
Tcp1	0.00191541	-0.173614	0.983	0.99	1
Gpr183	0.00191732	-0.622206	0.179	0.268	1
Camk1d	0.00192195	0.530488	0.315	0.223	1
Atpif1	0.00192202	-0.157097	0.997	0.986	1
Ccdc28b	0.00192249	0.393045	0.419	0.318	1
Actr3	0.00192333	-0.193931	0.986	0.997	1
Clk1	0.00193237	0.332703	0.555	0.456	1
Tnfrsf13b	0.00194943	0.568762	0.309	0.219	1
Mrps26	0.00195518	0.275826	0.72	0.663	1
Caprin1	0.00196418	0.198169	0.908	0.877	1
Cdh24	0.0019666	0.689842	0.22	0.142	1
Pdia4	0.00196663	-0.275726	0.728	0.805	1
Mdm1	0.0019701	0.790886	0.153	0.086	1
H2-T23	0.00197036	0.32508	0.647	0.537	1
Lbr	0.00197144	0.207582	0.893	0.805	1
Tmem161a	0.00197317	0.457389	0.275	0.185	1
Epc2	0.00199299	0.763853	0.165	0.095	1
Sumo2	0.00199738	-0.143861	1	1	1
Myc	0.00200883	-0.255021	0.379	0.475	1
Smad2	0.00201498	0.455629	0.335	0.238	1
Ap3s2	0.00201573	0.521764	0.327	0.237	1
Kdm4c	0.00202385	0.862531	0.217	0.142	1
Xndc1	0.0020371	0.742791	0.202	0.128	1
Kif1bp	0.00205217	0.724869	0.194	0.119	1
Slc38a9	0.00205233	0.623052	0.225	0.145	1
Ctc1	0.0020564	0.562219	0.217	0.136	1
Rpl30	0.0020578	-0.0611196	1	1	1
Mrpl35	0.00208111	-0.363166	0.486	0.568	1
Nop16	0.00208276	-0.403627	0.39	0.482	1
Lsm5	0.00208818	-0.238234	0.749	0.838	1
Tnrc6c	0.00208865	0.466779	0.335	0.24	1
Tango2	0.0020916	0.604408	0.301	0.214	1
Ankrd6	0.00209599	0.67794	0.185	0.111	1
0610030E20Rik	0.00209611	0.56108	0.306	0.216	1
Nsmce3	0.00211285	0.388442	0.361	0.259	1
Mthfs	0.00211518	0.60324	0.266	0.181	1
Asb7	0.00213271	0.957804	0.145	0.081	1
Pxk	0.00213895	0.680327	0.243	0.162	1
Cep95	0.00214029	0.530638	0.231	0.149	1
Mboat1	0.00214137	-1.10807	0.072	0.136	1
Trmt112	0.00214747	-0.151565	0.988	0.998	1
Mms19	0.00214923	0.602614	0.298	0.211	1
Stk39	0.00215567	0.494444	0.35	0.257	1
Ddx51	0.00216229	0.860628	0.127	0.067	1
Mospd1	0.00216482	1.05091	0.121	0.064	1
Sp110	0.00216699	0.311986	0.665	0.561	1
Ptk7	0.00217193	0.742791	0.142	0.078	1
Bcap31	0.00218951	-0.238657	0.775	0.836	1
Arhgap27	0.00220518	0.520399	0.283	0.193	1
Art4	0.00220746	0.539974	0.321	0.231	1
Tmem160	0.0022267	-0.269365	0.806	0.872	1
Slc25a51	0.00222893	0.481526	0.298	0.209	1
Polr2k	0.00223507	-0.275419	0.65	0.746	1
As3mt	0.0022367	1.02573	0.147	0.085	1
Supt3	0.00224522	0.616343	0.272	0.188	1
Tax1bp1	0.00224636	-0.224578	0.708	0.824	1
Usp1	0.002258	-0.334533	0.454	0.572	1
Kansl2	0.00226059	0.382555	0.477	0.366	1
Rpa1	0.00226254	-0.265071	0.494	0.623	1
Ptpn18	0.00226466	0.156899	1	0.99	1
Spindoc	0.00226569	0.742791	0.168	0.098	1
Ino80d	0.00227228	0.804192	0.156	0.09	1
Ncoa2	0.00227466	0.582327	0.275	0.188	1
Gprasp1	0.00227604	0.637438	0.165	0.095	1
Slc35e2	0.00228117	0.692751	0.199	0.124	1
BC035044	0.00228836	0.360585	0.52	0.416	1
Txnl4a	0.00229808	0.315977	0.465	0.354	1
Mrps16	0.00229972	-0.204816	0.847	0.915	1
Dda1	0.00230491	0.318218	0.59	0.494	1
Stambpl1	0.00231468	0.690324	0.225	0.149	1
Mios	0.00231717	0.724176	0.179	0.109	1
Rsf1	0.00231823	0.431724	0.486	0.411	1
Arhgap35	0.00233058	0.898911	0.101	0.048	1
Ptpn1	0.00233168	0.353816	0.572	0.472	1
Ccni	0.00233727	0.334133	0.653	0.568	1
Mpst	0.00234282	0.326658	0.549	0.437	1
Gm8186	0.00234327	-0.230011	0.786	0.85	1
Sap18	0.0023454	0.195559	0.916	0.898	1
Zfp560	0.00237085	0.493272	0.306	0.218	1
Dbr1	0.00237323	0.592374	0.217	0.138	1
Nek7	0.00239337	0.489035	0.289	0.199	1
Kdelr2	0.00239696	0.39949	0.41	0.307	1
Gdpgp1	0.00241088	0.675677	0.15	0.085	1
U2af1l4	0.00241442	0.894794	0.124	0.066	1
Chfr	0.00243907	0.385381	0.439	0.342	1
Samsn1	0.00244135	0.691807	0.257	0.174	1
Zfp384	0.0024422	0.643256	0.15	0.085	1
Ccdc137	0.00246613	0.830254	0.124	0.066	1
Zcchc6	0.00246824	0.528667	0.442	0.368	1
2810403A07Rik	0.00246898	0.346863	0.335	0.237	1
Cisd1	0.00248403	-0.474439	0.39	0.477	1
Btbd7	0.00249344	0.809134	0.194	0.123	1
Adipor2	0.00249552	0.397963	0.399	0.297	1
Dennd3	0.00249759	0.923364	0.121	0.064	1
Fbxw2	0.00250954	0.330408	0.483	0.377	1
Atg14	0.00251204	0.71037	0.116	0.059	1
Siva1	0.00251449	-0.267173	0.587	0.71	1
Cacfd1	0.00251993	0.397404	0.289	0.193	1
Endov	0.00251994	0.742791	0.171	0.102	1
Renbp	0.00254597	0.667829	0.168	0.098	1
Itfg1	0.00255611	0.489505	0.382	0.294	1
Gtf2e1	0.00256407	0.921129	0.11	0.055	1
Pepd	0.00256559	0.407722	0.506	0.413	1
Psmd6	0.00257859	-0.270384	0.639	0.756	1
Rnf6	0.00259731	0.473975	0.338	0.244	1
Atp5k	0.00261033	-0.247733	0.769	0.829	1
Rubcn	0.00261465	0.802912	0.124	0.066	1
Emid1	0.0026258	0.602193	0.257	0.174	1
Smpd1	0.00265046	0.482728	0.324	0.233	1
Slc2a3	0.00266468	1.0323	0.127	0.069	1
Krt10	0.00267589	0.497679	0.396	0.306	1
Fads1	0.00267626	0.657902	0.231	0.154	1
Lrba	0.00267709	0.53634	0.159	0.092	1
Mlec	0.00267762	-0.307012	0.636	0.724	1
Morf4l1	0.00267965	0.148588	0.988	0.991	1
Ankrd11	0.00268805	0.221758	0.841	0.819	1
Ttc5	0.0026888	0.407443	0.405	0.306	1
C2cd3	0.0027065	0.648327	0.269	0.188	1
Srsf2	0.00270689	-0.135205	0.98	0.988	1
Nsa2	0.00271642	0.142543	0.997	0.991	1
Shmt1	0.00271745	-0.428395	0.197	0.292	1
Ppp2r1b	0.00272816	0.602861	0.246	0.166	1
Timm8a1	0.00272817	-0.544441	0.367	0.44	1
Slc12a9	0.00274065	0.813181	0.11	0.055	1
Tmem201	0.00274586	0.671238	0.156	0.09	1
Osbpl8	0.00275827	0.350764	0.439	0.337	1
Ddx6	0.00275997	0.273306	0.708	0.644	1
Pcnx4	0.00276629	0.762969	0.173	0.105	1
Inpp4b	0.0027667	0.742791	0.205	0.133	1
Eprs	0.00276744	-0.322108	0.514	0.606	1
Tubgcp3	0.00276982	0.687296	0.234	0.157	1
Tnfrsf21	0.00277717	0.875242	0.13	0.071	1
Rpn2	0.0027777	-0.237861	0.76	0.815	1
Txnl1	0.00277819	-0.278436	0.714	0.8	1
Atp6ap1	0.00278228	0.506836	0.405	0.314	1
Mad1l1	0.00280878	0.610036	0.332	0.245	1
Smarcd1	0.00284121	0.384635	0.486	0.397	1
Pdcd2	0.00285913	0.316445	0.61	0.515	1
Sympk	0.00287598	0.505752	0.373	0.285	1
Sec24b	0.0028791	0.468471	0.361	0.266	1
[truncated: 5,778 more rows]

## Sheet: adj p <.001
	p_val	avg_log2FC	pct.1	pct.2	p_val_adj
Gclm	2.63912e-79	-1.08659	1	1	3.57944e-75
Rps7	6.85546e-73	0.499054	1	1	9.29806e-69
Mzb1	2.73805e-65	2.86678	0.734	0.214	3.71361e-61
Lgals1	4.20659e-64	-1.259	0.96	0.995	5.7054e-60
Endou	7.78553e-63	1.93528	0.873	0.466	1.05595e-58
Id3	2.48201e-60	2.58043	0.702	0.157	3.36635e-56
Rpl13a	6.86853e-60	0.915979	1	0.974	9.31578e-56
Ighm	2.31026e-55	1.76788	0.873	0.43	3.1334e-51
Sdc4	2.36476e-53	3.42462	0.514	0.076	3.20733e-49
Ilvbl	1.79558e-46	1.64514	0.85	0.504	2.43535e-42
Tmsb4x	6.42829e-46	-0.629583	1	1	8.71869e-42
Pdlim4	2.12063e-44	1.87786	0.72	0.301	2.87622e-40
Il21r	2.22568e-44	1.69699	0.775	0.358	3.01869e-40
Sox13	5.39246e-42	1.27503	0.908	0.646	7.3138e-38
Uba52	3.2283e-41	0.550586	1	1	4.37854e-37
Ramp1	4.95385e-41	1.00868	0.98	0.798	6.7189e-37
Rgs10	4.89704e-40	1.27216	0.919	0.667	6.64185e-36
Epcam	1.85114e-39	2.32061	0.535	0.143	2.5107e-35
St6gal1	4.52831e-39	1.56436	0.754	0.373	6.14175e-35
Vim	2.1459e-38	-1.80824	0.624	0.855	2.91048e-34
Abi3	3.85821e-38	0.994793	0.954	0.77	5.23288e-34
Trdv4	2.23342e-37	-1.09206	0.48	0.908	3.02918e-33
Blk	2.47685e-35	0.774915	0.983	0.872	3.35935e-31
Ccr2	2.9357e-35	-1.94171	0.251	0.653	3.98169e-31
Tsc22d4	1.01821e-34	0.69492	0.994	0.974	1.381e-30
Ampd1	7.74111e-34	3.01288	0.376	0.064	1.04993e-29
Aqp11	2.73712e-33	2.06472	0.642	0.29	3.71236e-29
Ccr9	3.65364e-32	0.769617	0.997	0.978	4.95544e-28
Ifngr1	6.28117e-32	0.613787	1	0.99	8.51915e-28
Gapdh	1.55855e-31	0.512053	1	1	2.11386e-27
Gpr25	2.60892e-31	1.29455	0.792	0.465	3.53848e-27
Prrt1	2.77713e-31	1.27072	0.795	0.497	3.76662e-27
Eef2	4.35131e-31	0.409956	1	1	5.90168e-27
Rps2	4.49665e-31	-0.385621	1	1	6.09881e-27
Tcrg-V4	4.75163e-30	1.74498	0.613	0.24	6.44464e-26
Tcf12	1.0302e-29	1.49292	0.694	0.366	1.39726e-25
Etv5	6.60466e-29	1.63617	0.633	0.288	8.95791e-25
Ubc	1.75697e-28	1.01954	0.864	0.589	2.38297e-24
Hint1	1.97976e-28	-0.619696	0.997	1	2.68514e-24
Nrros	2.80781e-28	1.17584	0.803	0.515	3.80824e-24
Rorc	5.75851e-28	0.908302	0.931	0.782	7.81027e-24
Ly6e	7.43864e-28	-0.726834	0.997	1	1.0089e-23
Ms4a4b	9.28876e-28	-3.01876	0.061	0.394	1.25983e-23
Pdcd1	1.08617e-26	1.08192	0.855	0.511	1.47317e-22
Emp3	3.00474e-26	-0.956575	0.688	0.908	4.07533e-22
Atp1b1	4.10743e-26	2.13872	0.419	0.123	5.57091e-22
Lat	2.6791e-25	0.480048	1	1	3.63367e-21
Ms4a6b	3.85612e-25	-3.24072	0.04	0.335	5.23005e-21
Shisa5	5.79369e-25	-1.59071	0.269	0.625	7.85798e-21
Ypel3	8.57853e-25	0.764013	0.971	0.886	1.16351e-20
Parm1	1.08269e-24	4.10034	0.202	0.01	1.46846e-20
Smox	1.38441e-24	0.974899	0.85	0.62	1.87767e-20
Npm1	1.39798e-24	-0.436992	1	1	1.89608e-20
Iqch	1.97282e-24	1.26809	0.725	0.437	2.67573e-20
Tspan13	2.67727e-24	0.867909	0.887	0.651	3.63118e-20
Sla	9.34424e-24	0.82262	0.931	0.807	1.26736e-19
Gata3	1.08796e-23	0.818223	0.942	0.798	1.47561e-19
Mif	1.30756e-23	-0.527495	1	0.998	1.77345e-19
Gpr162	1.83617e-23	4.60077	0.188	0.009	2.4904e-19
Hmga1	2.34984e-23	0.604541	0.983	0.952	3.18709e-19
Gm13652	3.03939e-23	2.20674	0.376	0.107	4.12233e-19
Itgb7	3.70376e-23	-1.30216	0.338	0.663	5.02341e-19
Actb	4.0064e-23	-0.318888	1	1	5.43388e-19
Cd3d	5.59727e-23	0.432399	1	0.998	7.59158e-19
Prdx1	6.36703e-23	-0.586619	1	1	8.63561e-19
Abcb9	8.18752e-23	1.19518	0.688	0.39	1.11047e-18
Myl6	9.79859e-23	-0.403548	1	1	1.32898e-18
Cxcr5	1.07475e-22	2.10536	0.379	0.112	1.45768e-18
Rpl14	1.47785e-22	-0.284167	1	1	2.00441e-18
Atp5g1	2.04193e-22	-0.603908	0.991	0.995	2.76946e-18
Art1	2.64301e-22	1.9215	0.379	0.111	3.58472e-18
Rpl32	2.9805e-22	-0.207902	1	1	4.04246e-18
Gpx1	3.16817e-22	-0.513584	1	0.998	4.29699e-18
Hsp90b1	3.63513e-22	-0.799037	0.977	0.99	4.93032e-18
Psme2	3.77548e-22	-0.626648	0.971	0.995	5.12069e-18
Rpl29	4.81219e-22	0.257551	1	1	6.52677e-18
Rps25	6.26092e-22	-0.423113	1	1	8.49168e-18
Man1a	6.45628e-22	1.6299	0.514	0.223	8.75665e-18
Trdv5	1.37212e-21	1.86416	0.384	0.117	1.86101e-17
Ergic1	1.57558e-21	1.01794	0.754	0.485	2.13696e-17
Cyba	2.08017e-21	-0.567739	0.968	0.991	2.82133e-17
Dck	2.65131e-21	0.976201	0.769	0.53	3.59597e-17
Ppia	2.82081e-21	-0.341508	1	1	3.82587e-17
Slc11a2	6.48504e-21	1.27259	0.627	0.339	8.79566e-17
Rasal3	6.50465e-21	0.774023	0.905	0.762	8.82225e-17
Rps26	6.53156e-21	-0.21288	1	1	8.85875e-17
Tagln2	8.4634e-21	-0.837188	0.754	0.905	1.14789e-16
Cox7b	9.49387e-21	-0.542611	0.96	0.993	1.28765e-16
Ppp1cc	1.57447e-20	0.515649	0.988	0.986	2.13545e-16
Ucp2	2.33932e-20	0.370318	1	1	3.17282e-16
Cd5	3.43904e-20	1.66418	0.419	0.154	4.66437e-16
Calr	3.59337e-20	-0.765605	0.876	0.962	4.87369e-16
Tbxa2r	5.30935e-20	1.37249	0.566	0.282	7.20107e-16
Podnl1	5.46276e-20	1.22584	0.633	0.359	7.40914e-16
Arpp21	5.77626e-20	1.73176	0.457	0.183	7.83435e-16
Chchd2	1.01576e-19	0.388471	1	0.998	1.37767e-15
Rpl22l1	1.50305e-19	-0.404528	1	1	2.03859e-15
Psma2	2.07969e-19	-0.481495	0.974	0.997	2.82068e-15
Fabp5	3.67308e-19	-0.579774	0.809	0.971	4.9818e-15
Trgv2	3.75109e-19	0.947398	0.873	0.667	5.0876e-15
D430041D05Rik	4.11141e-19	2.87055	0.225	0.038	5.5763e-15
Rps27a	4.37867e-19	-0.167887	1	1	5.9388e-15
Syt13	4.46995e-19	2.1749	0.312	0.088	6.06259e-15
Tspo	4.76794e-19	-0.717424	0.847	0.946	6.46675e-15
Heg1	5.49447e-19	1.05755	0.699	0.472	7.45215e-15
Atp8b4	5.75299e-19	-1.43653	0.263	0.546	7.80278e-15
Flna	6.22933e-19	-0.871524	0.5	0.777	8.44884e-15
Cxcr6	6.60457e-19	-1.17795	0.428	0.684	8.95778e-15
Nebl	6.90748e-19	0.636889	0.948	0.782	9.36861e-15
Klc3	7.75609e-19	1.77316	0.361	0.119	1.05196e-14
Notch3	1.29646e-18	1.80692	0.332	0.098	1.7584e-14
Zap70	1.2966e-18	0.650398	0.965	0.921	1.75857e-14
Capn3	1.54577e-18	1.25094	0.633	0.375	2.09653e-14
Pcbp2	1.66409e-18	0.40194	1	0.997	2.25701e-14
Cd6	1.79936e-18	1.26734	0.598	0.337	2.44047e-14
Sh3bgrl3	1.91937e-18	-0.332526	1	1	2.60324e-14
Ano6	1.97759e-18	0.978345	0.72	0.466	2.68221e-14
Pdia3	3.08582e-18	-0.578482	0.986	0.995	4.1853e-14
Rasgrp1	3.39425e-18	0.603004	0.98	0.886	4.60362e-14
Pdia6	3.97985e-18	-0.740531	0.893	0.96	5.39787e-14
Ldha	6.09171e-18	-0.403153	1	1	8.26219e-14
Rps27l	6.87346e-18	-0.52012	0.936	0.984	9.32248e-14
Hdac7	8.56259e-18	0.718208	0.882	0.71	1.16134e-13
Atp5g3	9.41453e-18	-0.346421	1	1	1.27689e-13
Cox5a	9.6197e-18	-0.36966	0.997	1	1.30472e-13
Ptpn7	1.02845e-17	0.660698	0.948	0.888	1.39489e-13
Tmsb10	1.08164e-17	-0.321024	1	1	1.46703e-13
Gm37552	1.41392e-17	1.67209	0.384	0.145	1.9177e-13
Eef1d	1.52569e-17	-0.461391	0.994	1	2.06929e-13
Xlr4b	1.69041e-17	1.01258	0.676	0.439	2.29271e-13
Myb	1.72999e-17	0.7764	0.864	0.693	2.34639e-13
Cox5b	1.89097e-17	-0.403601	0.997	1	2.56472e-13
Psma3	2.26368e-17	-0.548324	0.954	0.978	3.07023e-13
Klf2	2.37612e-17	-1.1613	0.301	0.596	3.22274e-13
Plekhf1	2.41579e-17	1.03884	0.642	0.375	3.27654e-13
Cyb5a	2.88372e-17	0.57938	0.977	0.934	3.91119e-13
Kbtbd11	3.8817e-17	0.761054	0.806	0.596	5.26475e-13
Colq	3.96609e-17	2.0849	0.312	0.098	5.37921e-13
Gimap4	4.28698e-17	-2.09615	0.124	0.377	5.81442e-13
Dgkeos	6.1943e-17	1.43047	0.483	0.23	8.40133e-13
Ndufa13	6.8811e-17	-0.394397	0.991	0.998	9.33283e-13
Cox8a	6.98536e-17	-0.332199	1	1	9.47424e-13
Tmem121	7.32116e-17	1.18689	0.538	0.287	9.9297e-13
Slc35b4	8.82705e-17	1.21523	0.546	0.299	1.19721e-12
Stx6	1.16584e-16	1.01309	0.601	0.337	1.58122e-12
Sla2	1.1821e-16	0.708459	0.855	0.649	1.60328e-12
Cd247	1.33559e-16	0.546918	0.991	0.971	1.81146e-12
Sec61b	1.65823e-16	-0.353799	1	1	2.24905e-12
Ikzf1	1.91247e-16	0.87186	0.734	0.494	2.59388e-12
Hsdl1	1.92881e-16	1.76071	0.327	0.109	2.61605e-12
Gfra1	2.02166e-16	2.34686	0.251	0.064	2.74198e-12
Evl	2.50025e-16	-1.05089	0.364	0.623	3.39109e-12
Txn1	2.55153e-16	-0.535698	0.919	0.972	3.46065e-12
Eif5a	2.59177e-16	-0.359418	1	1	3.51522e-12
Samhd1	2.74523e-16	-1.52493	0.217	0.473	3.72335e-12
Bcl2	2.98813e-16	1.08168	0.613	0.351	4.05281e-12
Il17a	3.16618e-16	3.48869	0.263	0.076	4.29429e-12
Rpl10a	3.39346e-16	-0.194535	1	1	4.60254e-12
Lamp1	3.6362e-16	0.646695	0.87	0.691	4.93178e-12
St8sia1	4.11067e-16	1.57118	0.358	0.133	5.5753e-12
Sox4	4.28502e-16	0.741929	0.928	0.781	5.81178e-12
Pstpip1	4.86839e-16	0.756827	0.812	0.62	6.60299e-12
Rps6	8.10173e-16	-0.248069	1	1	1.09884e-11
Psap	8.23287e-16	0.54788	0.974	0.896	1.11662e-11
Rsrp1	8.83819e-16	0.503555	0.986	0.969	1.19872e-11
Sdf2l1	1.09014e-15	-0.916939	0.52	0.755	1.47856e-11
Cd164	1.09202e-15	0.695838	0.905	0.732	1.48111e-11
Snrpd1	1.34254e-15	-0.491593	0.974	0.991	1.82088e-11
Btg1	1.34285e-15	0.895562	0.772	0.572	1.82131e-11
Camk2d	1.66874e-15	0.520399	0.991	0.934	2.26331e-11
Calm1	1.92098e-15	-0.38716	1	1	2.60542e-11
Cnn2	1.98221e-15	-0.520948	0.931	0.984	2.68847e-11
Ran	2.17184e-15	-0.424404	0.997	1	2.94566e-11
Tecpr1	2.20317e-15	1.02724	0.659	0.446	2.98815e-11
Bst2	2.23259e-15	-1.24478	0.324	0.573	3.02806e-11
S100a6	2.43294e-15	-1.38987	0.572	0.739	3.29979e-11
Tpt1	3.41258e-15	0.182511	1	1	4.62849e-11
Ftl1	3.50976e-15	0.304537	1	1	4.76029e-11
Chmp1b	3.51926e-15	1.01826	0.627	0.404	4.77317e-11
Actg1	3.5687e-15	-0.356288	1	1	4.84022e-11
Atp5j2	4.98187e-15	-0.310119	1	1	6.75691e-11
Klf3	5.27818e-15	1.02972	0.653	0.439	7.15879e-11
Uqcrb	5.40878e-15	-0.444052	0.974	0.988	7.33592e-11
Rabgap1l	5.63875e-15	0.809134	0.751	0.566	7.64784e-11
Ly6a	7.08905e-15	-3.3161	0.023	0.204	9.61488e-11
Pde6a	7.45518e-15	2.02819	0.263	0.078	1.01115e-10
Ssr4	7.6847e-15	-0.460708	0.98	0.979	1.04228e-10
Banf1	7.86142e-15	-0.469344	0.98	0.991	1.06624e-10
Trp53i11	9.04276e-15	1.03599	0.647	0.428	1.22647e-10
Fbln2	9.95511e-15	1.83516	0.338	0.131	1.35021e-10
Nop10	1.14701e-14	-0.429655	0.986	0.997	1.55569e-10
Zfp219	1.14995e-14	1.215	0.509	0.276	1.55967e-10
Jakmip1	1.22426e-14	0.77537	0.746	0.522	1.66047e-10
Ets1	1.37462e-14	0.468044	0.971	0.933	1.8644e-10
Cks1b	1.37853e-14	-0.521482	0.569	0.85	1.8697e-10
Serinc3	1.81717e-14	0.983054	0.621	0.402	2.46463e-10
Ppm1e	2.24311e-14	2.20674	0.185	0.035	3.04233e-10
Nfkbie	2.34642e-14	1.42285	0.408	0.185	3.18245e-10
Midn	2.38359e-14	0.824523	0.717	0.525	3.23286e-10
Rpl41	2.38896e-14	-0.169111	1	1	3.24015e-10
Cox7a2	2.47877e-14	-0.376346	1	0.998	3.36196e-10
Fam167a	2.51513e-14	1.51538	0.379	0.164	3.41127e-10
Elf1	2.57874e-14	0.592621	0.922	0.841	3.49755e-10
Cxxc5	2.58184e-14	1.48309	0.425	0.211	3.50175e-10
Phb	2.65576e-14	-0.689581	0.653	0.851	3.602e-10
Abracl	2.66039e-14	-0.497599	0.884	0.965	3.60829e-10
Cox6a1	2.7407e-14	-0.399276	0.988	0.998	3.71722e-10
Lipa	2.90103e-14	0.807269	0.754	0.56	3.93466e-10
Gm10282	3.08294e-14	-0.696192	0.595	0.839	4.18139e-10
Zyx	3.64581e-14	0.810003	0.746	0.551	4.94481e-10
Csrnp1	3.85686e-14	1.23696	0.506	0.283	5.23105e-10
Dynlt1b	4.24793e-14	1.43613	0.399	0.185	5.76147e-10
Sipa1	4.54852e-14	0.943743	0.61	0.389	6.16916e-10
Arhgap45	4.86807e-14	0.510653	0.974	0.927	6.60256e-10
Prkd2	5.21699e-14	0.949242	0.621	0.385	7.0758e-10
1110008P14Rik	5.62238e-14	0.718008	0.789	0.591	7.62564e-10
Pclaf	6.87785e-14	-0.294808	0.699	0.921	9.32843e-10
Rbm3	7.09497e-14	-0.300069	1	1	9.6229e-10
Dclre1c	7.10879e-14	1.5204	0.341	0.135	9.64165e-10
Snrpf	7.33958e-14	-0.391541	0.994	0.997	9.95468e-10
1700012B07Rik	9.55186e-14	0.859774	0.711	0.492	1.29552e-09
Ppt2	1.14559e-13	0.796786	0.668	0.434	1.55376e-09
Dhrs3	1.31082e-13	3.10269	0.15	0.022	1.77786e-09
Pnrc1	1.48827e-13	0.649682	0.945	0.843	2.01853e-09
Park7	1.49677e-13	-0.371574	0.997	0.998	2.03007e-09
Eif2s3y	1.60235e-13	1.14702	0.454	0.23	2.17327e-09
Bach1	1.65655e-13	1.25669	0.46	0.24	2.24678e-09
Il17rb	1.67633e-13	1.36649	0.318	0.117	2.27361e-09
Rab27a	1.83981e-13	0.871459	0.682	0.489	2.49534e-09
Fkbp1a	1.93146e-13	0.43665	0.977	0.972	2.61964e-09
Kcna3	2.01038e-13	1.02851	0.572	0.366	2.72667e-09
Pdcd4	2.01895e-13	0.930781	0.607	0.37	2.7383e-09
Eng	2.0488e-13	1.25118	0.436	0.219	2.77878e-09
Ppp1r14b	2.11029e-13	0.537435	0.968	0.922	2.86219e-09
Nhp2	2.16271e-13	-0.632922	0.699	0.879	2.93328e-09
H13	2.22662e-13	0.609113	0.873	0.767	3.01997e-09
Set	2.27619e-13	-0.473931	0.974	0.979	3.0872e-09
Arl6ip1	2.53105e-13	0.424529	0.994	0.998	3.43287e-09
Cenpw	2.63696e-13	-0.942295	0.315	0.58	3.5765e-09
Rps13	2.96796e-13	-0.135143	1	1	4.02544e-09
Nt5c	3.22915e-13	-0.761004	0.442	0.689	4.37969e-09
mt-Atp8	3.40193e-13	0.266814	1	1	4.61404e-09
Hspe1	3.58113e-13	-0.402737	0.994	0.997	4.85709e-09
Rpl27	4.22489e-13	0.187634	1	1	5.73022e-09
Inpp5b	4.41514e-13	1.03072	0.512	0.29	5.98825e-09
Lef1	4.55976e-13	0.72379	0.861	0.737	6.18441e-09
Psmb5	4.76303e-13	-0.387605	0.977	0.998	6.4601e-09
Hist3h2ba	4.81379e-13	1.32982	0.471	0.245	6.52894e-09
Tm6sf1	5.29601e-13	1.3147	0.393	0.187	7.18298e-09
Prps2	5.55409e-13	0.811575	0.668	0.449	7.53301e-09
Hspa5	6.10144e-13	-0.609718	0.928	0.962	8.27539e-09
Ckb	6.11175e-13	0.562748	0.977	0.952	8.28937e-09
Plxnd1	6.17339e-13	1.0206	0.517	0.295	8.37297e-09
Coro2b	6.22461e-13	0.905344	0.584	0.354	8.44244e-09
Plcl1	6.73494e-13	1.75402	0.257	0.085	9.1346e-09
Arhgap4	6.83522e-13	0.791784	0.697	0.522	9.27061e-09
Gng5	7.12381e-13	-0.259847	1	1	9.66202e-09
Gm11808	7.34362e-13	0.837375	0.653	0.446	9.96015e-09
S100a10	7.64866e-13	-0.41204	0.994	0.997	1.03739e-08
Lax1	7.7085e-13	0.859277	0.645	0.439	1.0455e-08
Elovl5	9.25506e-13	0.897301	0.624	0.427	1.25526e-08
Rps27	9.58133e-13	0.211753	1	1	1.29952e-08
Sptssa	1.15964e-12	-0.643764	0.642	0.829	1.57282e-08
Atp5j	1.1937e-12	-0.329255	1	1	1.61902e-08
Itk	1.20824e-12	0.657379	0.812	0.636	1.63873e-08
Agfg2	1.224e-12	0.822435	0.616	0.385	1.66011e-08
Hspa8	1.2343e-12	0.290828	1	1	1.67408e-08
Rpsa	1.24148e-12	-0.154333	1	1	1.68382e-08
Mrpl42	1.26146e-12	-0.668458	0.636	0.822	1.71091e-08
Xlr4a	1.26758e-12	0.8311	0.694	0.522	1.71922e-08
Syk	1.35516e-12	2.0146	0.202	0.052	1.838e-08
Fam210b	1.60662e-12	1.74279	0.237	0.073	2.17906e-08
Dctpp1	1.64432e-12	-0.527163	0.763	0.927	2.23019e-08
Bcl11b	1.65558e-12	0.503556	0.96	0.867	2.24546e-08
Spint2	1.77586e-12	0.614591	0.858	0.791	2.4086e-08
Cirbp	2.34225e-12	0.592549	0.827	0.665	3.17679e-08
Pfdn6	2.83394e-12	-0.663269	0.595	0.8	3.84368e-08
Tbc1d10c	2.84569e-12	0.47455	0.962	0.927	3.85962e-08
Malat1	3.04947e-12	0.48282	1	0.998	4.13599e-08
Sec61g	3.08219e-12	-0.341672	1	0.998	4.18037e-08
Phf10	3.26419e-12	1.15783	0.402	0.193	4.42722e-08
Psmb3	3.41716e-12	-0.35063	0.997	0.998	4.6347e-08
Klk8	3.76404e-12	-0.600124	0.673	0.846	5.10516e-08
D8Ertd738e	4.23585e-12	-0.438274	0.951	0.974	5.74508e-08
Igfbp4	5.04732e-12	0.472473	0.59	0.295	6.84568e-08
Nlrx1	5.14771e-12	1.66828	0.327	0.147	6.98184e-08
Myl10	5.18636e-12	1.2565	0.491	0.287	7.03426e-08
Znrf1	5.44608e-12	0.505127	0.96	0.874	7.38651e-08
Rplp1	5.6971e-12	-0.158969	1	1	7.72697e-08
Cd52	5.84031e-12	-0.314616	1	1	7.92121e-08
Gng10	5.88712e-12	0.955095	0.561	0.358	7.98471e-08
Sytl1	5.96948e-12	0.868871	0.624	0.416	8.09641e-08
Dnm2	6.24129e-12	0.666212	0.74	0.549	8.46506e-08
Arvcf	7.10417e-12	2.16906	0.185	0.047	9.63539e-08
Cenpx	8.07491e-12	-0.632136	0.618	0.82	1.0952e-07
Chchd1	8.29167e-12	-0.574639	0.691	0.86	1.1246e-07
Atp5h	8.42014e-12	-0.323342	0.997	0.998	1.14202e-07
Rpl27a	8.98118e-12	-0.145855	1	1	1.21812e-07
Brf1	9.04303e-12	0.893034	0.581	0.378	1.22651e-07
Arhgap26	9.84595e-12	1.93544	0.188	0.048	1.33541e-07
Cd47	1.05697e-11	0.41005	0.994	0.969	1.43357e-07
Rnf114	1.09407e-11	0.640032	0.777	0.618	1.48389e-07
Psma1	1.17478e-11	-0.539996	0.754	0.879	1.59336e-07
Psmb1	1.43741e-11	-0.324686	1	0.998	1.94957e-07
1700048O20Rik	1.48932e-11	1.97801	0.217	0.067	2.01996e-07
Nedd8	1.49274e-11	-0.385004	0.98	0.993	2.0246e-07
Def6	1.52604e-11	0.456923	0.951	0.877	2.06977e-07
Fxyd7	1.55704e-11	2.72142	0.142	0.026	2.11181e-07
Rnf166	1.64158e-11	0.620156	0.751	0.57	2.22647e-07
Nkg7	1.73157e-11	-0.729277	0.538	0.741	2.34852e-07
Cfl1	1.96927e-11	-0.191434	1	1	2.67093e-07
Uqcr11	2.07135e-11	-0.398685	0.922	0.974	2.80937e-07
Ptprf	2.24052e-11	1.17889	0.408	0.211	3.03881e-07
St3gal6	2.37092e-11	1.54083	0.318	0.142	3.21569e-07
Map4k2	2.37318e-11	0.733931	0.673	0.48	3.21875e-07
Eif4a1	2.41669e-11	-0.26517	1	1	3.27776e-07
Cd3g	2.48772e-11	0.387956	0.997	0.988	3.3741e-07
Nrip1	2.4964e-11	0.56493	0.824	0.658	3.38586e-07
Zfp36l2	2.51913e-11	0.902311	0.572	0.354	3.4167e-07
Gm9493	2.83759e-11	0.388331	0.98	0.94	3.84863e-07
Zfp36l1	2.93831e-11	0.847347	0.682	0.515	3.98523e-07
Uqcc2	3.00873e-11	-0.530227	0.789	0.902	4.08074e-07
Tox	3.10494e-11	0.614232	0.815	0.618	4.21123e-07
Armc7	3.19353e-11	0.933614	0.546	0.339	4.33139e-07
Neil1	3.56883e-11	1.45521	0.292	0.119	4.8404e-07
Ppa1	3.88246e-11	-0.767532	0.373	0.606	5.26578e-07
Esrp1	3.93114e-11	3.06472	0.127	0.021	5.33181e-07
Ube2v1	4.15694e-11	1.0503	0.422	0.221	5.63806e-07
Cd27	4.25784e-11	0.554269	0.879	0.767	5.7749e-07
Nim1k	4.27289e-11	1.43395	0.289	0.117	5.79532e-07
Tnfsf11	4.28796e-11	1.04896	0.506	0.311	5.81576e-07
Smarcd2	4.3056e-11	0.665052	0.708	0.547	5.83969e-07
Atp5l	4.45451e-11	-0.273621	0.997	1	6.04166e-07
Klhl6	4.65252e-11	0.770077	0.621	0.42	6.31022e-07
Elob	4.75642e-11	-0.327666	0.997	1	6.45113e-07
Aagab	4.83471e-11	0.726908	0.679	0.491	6.55732e-07
Sh3bp5	5.05451e-11	1.00892	0.54	0.349	6.85543e-07
Btf3	5.43327e-11	-0.213568	1	1	7.36914e-07
C1qbp	5.52772e-11	-0.479882	0.824	0.936	7.49725e-07
Lig4	5.7635e-11	1.1213	0.393	0.195	7.81703e-07
Arid5a	6.50986e-11	0.928565	0.564	0.375	8.82933e-07
Cox6c	6.84818e-11	-0.270641	1	1	9.28818e-07
Sh3kbp1	7.06472e-11	0.575991	0.893	0.72	9.58188e-07
Sirt2	7.29424e-11	0.925844	0.656	0.499	9.89318e-07
B630019A10Rik	7.58059e-11	1.27622	0.358	0.178	1.02816e-06
Wfs1	7.58699e-11	1.83025	0.191	0.055	1.02902e-06
Cdkn1c	7.77597e-11	1.47976	0.338	0.161	1.05465e-06
Fkbp2	7.88746e-11	-0.825808	0.436	0.632	1.06978e-06
Satb1	1.00376e-10	0.617888	0.829	0.693	1.36141e-06
Nav2	1.0298e-10	0.657459	0.702	0.516	1.39672e-06
Xlr4c	1.10055e-10	1.23089	0.367	0.185	1.49268e-06
Eif2ak3	1.13697e-10	1.60339	0.266	0.105	1.54207e-06
Manf	1.34278e-10	-0.552539	0.968	0.981	1.82121e-06
Cotl1	1.35472e-10	-0.485416	0.775	0.903	1.8374e-06
Psmb7	1.38592e-10	-0.544905	0.616	0.812	1.87972e-06
Rps17	1.47897e-10	-0.235403	1	1	2.00593e-06
Dgkd	1.49426e-10	0.954295	0.483	0.285	2.02666e-06
Git2	1.50499e-10	0.687777	0.711	0.532	2.04121e-06
Tesc	1.54265e-10	-1.32388	0.22	0.406	2.0923e-06
H1f0	1.55447e-10	0.931423	0.688	0.515	2.10833e-06
Rps5	1.6142e-10	-0.11859	1	1	2.18934e-06
Cd81	1.64848e-10	0.585943	0.812	0.648	2.23584e-06
Gm48321	1.90071e-10	1.86144	0.173	0.047	2.57793e-06
Ablim1	1.95594e-10	0.555295	0.829	0.658	2.65284e-06
Prr13	2.04053e-10	-0.703142	0.578	0.741	2.76757e-06
Mpp1	2.12493e-10	0.815122	0.587	0.392	2.88205e-06
Tia1	2.17294e-10	0.57953	0.775	0.589	2.94716e-06
Fdx1	2.26302e-10	0.907247	0.546	0.356	3.06934e-06
Rbmx	2.32876e-10	0.778541	0.665	0.497	3.1585e-06
Nop58	2.46274e-10	-0.610061	0.636	0.827	3.34022e-06
Psme2b	2.64771e-10	-1.74141	0.107	0.275	3.59109e-06
Rpl7a	2.67737e-10	-0.178736	1	1	3.63131e-06
Tgfbr2	2.80564e-10	0.706449	0.717	0.544	3.80529e-06
Usp3	2.93741e-10	0.763904	0.595	0.406	3.984e-06
Snrpd3	2.95941e-10	-0.374313	0.962	0.978	4.01384e-06
Ndufa4	3.35831e-10	-0.284594	0.994	1	4.55488e-06
Irf2bpl	3.47278e-10	0.784713	0.616	0.42	4.71013e-06
Bmp7	3.51005e-10	2.28336	0.147	0.035	4.76068e-06
Lsm4	3.59038e-10	-0.377343	0.962	0.988	4.86963e-06
Ptpre	3.75075e-10	1.14226	0.393	0.207	5.08714e-06
Gsto1	3.75365e-10	-1.50038	0.142	0.32	5.09108e-06
Ptger4	4.24631e-10	1.03999	0.37	0.185	5.75927e-06
Lsm7	4.44191e-10	-0.418229	0.916	0.976	6.02456e-06
Atp5f1	4.55104e-10	-0.271348	0.997	0.998	6.17257e-06
Bag1	4.8242e-10	-0.572495	0.711	0.839	6.54306e-06
Tcrg-C2	4.99124e-10	0.695743	0.575	0.354	6.76962e-06
Eny2	5.17362e-10	-0.503598	0.691	0.846	7.01699e-06
Sf3b6	5.31908e-10	-0.349925	0.965	0.984	7.21426e-06
Itgb2	5.34985e-10	0.62929	0.714	0.522	7.25601e-06
Eif3f	5.57267e-10	0.2555	1	1	7.55821e-06
Mbp	6.08225e-10	0.8116	0.572	0.385	8.24936e-06
Ndufb6	6.10311e-10	-0.415008	0.867	0.955	8.27765e-06
Arhgap9	6.45139e-10	0.502577	0.864	0.722	8.75003e-06
Hist1h2ae	6.68985e-10	-0.418376	0.624	0.841	9.07344e-06
Ostc	6.93002e-10	-0.429054	0.908	0.955	9.39919e-06
Arhgdib	6.93744e-10	-0.272941	1	1	9.40925e-06
Atp5e	7.4276e-10	-0.249189	1	1	1.00741e-05
Tma7	7.44905e-10	-0.297829	1	0.998	1.01031e-05
Hnrnpl	7.94309e-10	0.341325	0.991	0.981	1.07732e-05
Foxn3	8.1387e-10	0.636858	0.694	0.487	1.10385e-05
Tmem108	8.16729e-10	1.06036	0.399	0.216	1.10773e-05
Baz2a	8.50226e-10	0.769615	0.578	0.371	1.15316e-05
Tmem59	8.64362e-10	0.451757	0.884	0.767	1.17233e-05
A930003A15Rik	8.69847e-10	1.55493	0.246	0.098	1.17977e-05
Ptrh1	8.79482e-10	1.22639	0.318	0.149	1.19284e-05
Erh	8.81073e-10	0.610246	0.717	0.547	1.195e-05
Pabpc1	8.83109e-10	0.231301	1	1	1.19776e-05
Nav1	9.19194e-10	2.27331	0.124	0.024	1.2467e-05
Impdh1	9.34458e-10	0.635457	0.691	0.518	1.26741e-05
Lmo4	9.35637e-10	-1.13106	0.353	0.522	1.269e-05
Gpr132	9.87879e-10	0.8599	0.488	0.297	1.33986e-05
P2rx7	9.88246e-10	0.843536	0.529	0.344	1.34036e-05
Arhgef3	1.05475e-09	0.966262	0.413	0.219	1.43056e-05
Hmgb2	1.06578e-09	-0.247306	0.98	0.998	1.44551e-05
Pa2g4	1.07228e-09	-0.383598	0.98	0.991	1.45433e-05
Tomm20	1.08052e-09	-0.345542	0.968	0.993	1.46551e-05
Fam162a	1.27715e-09	-0.637376	0.54	0.718	1.7322e-05
Gtf2h4	1.30967e-09	0.589951	0.746	0.587	1.7763e-05
Uqcr10	1.35285e-09	-0.375575	0.971	0.991	1.83487e-05
Pglyrp2	1.35499e-09	0.646663	0.676	0.503	1.83777e-05
Hspd1	1.38225e-09	-0.511838	0.847	0.94	1.87474e-05
Cetn3	1.43024e-09	-0.595833	0.555	0.753	1.93983e-05
Myl12a	1.58411e-09	-0.308561	0.997	0.998	2.14853e-05
Ncl	1.63488e-09	-0.350717	0.991	1	2.21739e-05
Lrrc42	1.67657e-09	0.721653	0.52	0.314	2.27393e-05
Slc25a41	1.70897e-09	1.92499	0.13	0.028	2.31788e-05
Mrps14	1.83168e-09	-0.472787	0.835	0.919	2.4843e-05
Hsp90aa1	1.87534e-09	-0.378378	0.988	0.993	2.54352e-05
H2afj	1.94246e-09	-0.344272	0.983	0.991	2.63456e-05
Hprt	1.98518e-09	-0.523316	0.653	0.819	2.6925e-05
H2afz	2.05528e-09	-0.279467	1	1	2.78757e-05
Nfkbia	2.18658e-09	0.538025	0.546	0.361	2.96566e-05
Tnfrsf1a	2.18812e-09	0.853312	0.532	0.347	2.96774e-05
Mynn	2.41584e-09	0.919948	0.422	0.237	3.2766e-05
Prkar1a	2.45024e-09	0.307854	1	0.99	3.32326e-05
Gm525	2.45383e-09	3.24529	0.15	0.041	3.32813e-05
1810037I17Rik	2.45542e-09	-0.525491	0.662	0.851	3.33028e-05
Zfp36	2.74235e-09	0.912716	0.59	0.401	3.71945e-05
Magoh	3.00539e-09	-0.420586	0.775	0.917	4.07621e-05
Dbi	3.08167e-09	-0.346114	0.951	0.995	4.17967e-05
Gem	3.12656e-09	1.37684	0.22	0.083	4.24056e-05
Ppp1r3b	3.15591e-09	2.28532	0.136	0.033	4.28037e-05
Dnajb1	3.2246e-09	0.645996	0.685	0.556	4.37352e-05
Unc5cl	3.35825e-09	1.75687	0.191	0.066	4.5548e-05
Rtkn	3.52298e-09	1.35577	0.231	0.09	4.77822e-05
Igsf23	3.66307e-09	1.3134	0.272	0.119	4.96822e-05
Tmem151b	3.93118e-09	1.93781	0.176	0.057	5.33186e-05
Dzip1	4.02067e-09	2.41022	0.118	0.024	5.45323e-05
Ost4	4.05352e-09	-0.354601	0.957	0.979	5.49778e-05
Sh2d1a	4.1316e-09	-0.464046	0.691	0.832	5.60369e-05
Abhd8	4.22051e-09	0.418214	0.928	0.883	5.72427e-05
Carmil2	4.5649e-09	0.676482	0.656	0.491	6.19137e-05
Cbx4	4.67135e-09	0.883804	0.448	0.264	6.33575e-05
Rps29	4.72766e-09	0.143855	1	1	6.41213e-05
Glcci1	4.94063e-09	1.19824	0.347	0.181	6.70097e-05
Slc38a1	5.84442e-09	0.470817	0.858	0.769	7.92679e-05
Fcho1	5.895e-09	0.660614	0.668	0.52	7.99539e-05
Gmnn	5.92655e-09	-0.482501	0.405	0.646	8.03818e-05
Dap	5.96947e-09	0.724757	0.52	0.339	8.09639e-05
Sec11c	6.26755e-09	-0.556022	0.763	0.857	8.50067e-05
5730559C18Rik	6.36491e-09	0.977655	0.367	0.195	8.63272e-05
Cox7c	6.43751e-09	-0.251591	1	0.998	8.73119e-05
Ndufa12	6.50485e-09	-0.435012	0.777	0.922	8.82253e-05
Sesn3	6.5214e-09	0.761347	0.5	0.311	8.84497e-05
Tomm5	6.65261e-09	-0.52049	0.691	0.846	9.02294e-05
Fam83a	6.96756e-09	-1.20305	0.179	0.351	9.4501e-05
Arhgef2	7.37376e-09	0.684179	0.59	0.404	0.00010001
Cd7	7.536e-09	-1.21092	0.142	0.313	0.000102211
Sept9	7.57235e-09	0.384472	0.954	0.912	0.000102704
Sept1	8.14781e-09	0.231509	0.997	1	0.000110509
Ndufb7	8.16477e-09	-0.353691	0.96	0.988	0.000110739
Lcp2	8.26261e-09	0.51602	0.824	0.68	0.000112066
Runx3	8.40849e-09	0.737398	0.639	0.48	0.000114044
Gm13855	8.45885e-09	2.27622	0.113	0.022	0.000114727
Psme1	9.13513e-09	-0.302354	0.983	0.997	0.0001239
Yeats2	9.5746e-09	1.04235	0.373	0.206	0.00012986
Kcnn4	9.62349e-09	0.715245	0.592	0.432	0.000130523
Mtf2	1.01122e-08	0.613823	0.659	0.485	0.000137152
Psmb2	1.0158e-08	-0.336859	0.974	0.991	0.000137773
Gm10093	1.02893e-08	1.80692	0.162	0.05	0.000139553
Cnot2	1.04414e-08	0.688344	0.639	0.485	0.000141617
Arpc1b	1.04752e-08	-0.289421	0.991	0.995	0.000142075
Mef2a	1.09763e-08	0.905521	0.488	0.314	0.000148871
Tmem258	1.14646e-08	-0.295912	0.988	0.995	0.000155495
Cd8a	1.15122e-08	0.974201	0.5	0.339	0.00015614
H3f3b	1.17987e-08	0.243424	1	1	0.000160026
Vezf1	1.24318e-08	0.898911	0.428	0.25	0.000168612
Bpgm	1.27316e-08	0.892538	0.41	0.237	0.000172678
Dennd1c	1.31286e-08	0.865648	0.451	0.273	0.000178063
Nucks1	1.31391e-08	-0.491414	0.514	0.713	0.000178205
Cux1	1.3783e-08	0.387563	0.899	0.801	0.000186939
Psma7	1.40667e-08	-0.310054	0.986	0.997	0.000190787
Slc35d1	1.5004e-08	1.28974	0.338	0.185	0.000203499
Atg7	1.52322e-08	1.21228	0.298	0.147	0.000206594
Dusp2	1.54453e-08	0.856477	0.682	0.57	0.000209484
Traf4	1.70289e-08	0.555817	0.754	0.63	0.000230963
Rasgrp2	1.8153e-08	-0.616036	0.549	0.732	0.000246209
Ppp1r13b	1.89077e-08	1.40792	0.24	0.104	0.000256445
Cblb	1.94828e-08	0.833802	0.413	0.235	0.000264245
C030034L19Rik	1.99663e-08	0.977257	0.413	0.25	0.000270803
Wdr6	2.02158e-08	0.686355	0.587	0.416	0.000274187
Dennd2d	2.2086e-08	0.93025	0.419	0.247	0.000299553
Nck2	2.2485e-08	1.13809	0.376	0.219	0.000304964
Kdm5b	2.2941e-08	0.636227	0.662	0.509	0.000311149
Ptges3	2.41021e-08	-0.465907	0.743	0.889	0.000326897
Man2a2	2.45167e-08	0.96356	0.315	0.155	0.000332519
Sfr1	2.45977e-08	-0.473853	0.685	0.838	0.000333618
Ptma	2.47876e-08	-0.149384	1	1	0.000336195
Mrpl20	2.53557e-08	-0.451653	0.795	0.877	0.000343899
Ubald2	2.58892e-08	0.416095	0.922	0.82	0.000351135
Grcc10	2.64545e-08	0.370732	0.968	0.927	0.000358803
Rpl3	3.08106e-08	-0.167644	1	1	0.000417884
Kdm4b	3.08978e-08	1.10319	0.332	0.178	0.000419067
Ctsb	3.16362e-08	0.488317	0.792	0.649	0.000429082
Desi1	3.17339e-08	0.609753	0.708	0.544	0.000430407
Mettl9	3.17643e-08	0.543306	0.691	0.527	0.000430819
Btg2	3.23661e-08	0.681311	0.714	0.589	0.000438981
Msi2	3.31729e-08	0.859831	0.431	0.257	0.000449924
Snrpd2	3.38153e-08	-0.323026	0.974	0.986	0.000458637
Rpl10	3.54257e-08	-0.148978	1	1	0.000480479
Mcl1	3.54504e-08	0.68025	0.543	0.359	0.000480813
Ctnnb1	3.5476e-08	0.549051	0.694	0.528	0.00048116
Plxdc2	3.55957e-08	1.10643	0.338	0.185	0.000482785
Ptk2b	3.63311e-08	0.805076	0.52	0.359	0.000492758
Canx	3.66569e-08	-0.404211	0.908	0.946	0.000497177
Mkrn1	3.70134e-08	0.567958	0.665	0.508	0.000502013
Eif4b	3.94006e-08	0.369731	0.948	0.87	0.000534391
Herc3	3.98346e-08	1.10084	0.344	0.192	0.000540277
Ppp1r9b	4.14123e-08	0.800797	0.393	0.219	0.000561675
Cenpa	4.15918e-08	-0.419955	0.318	0.532	0.00056411
Fyco1	4.18702e-08	0.750965	0.361	0.192	0.000567885
Rapgef3	4.62197e-08	1.28336	0.237	0.104	0.000626878
Narf	4.74014e-08	0.751155	0.526	0.354	0.000642905
Mrps24	4.76737e-08	-0.380043	0.841	0.919	0.000646598
Tomm34	4.81432e-08	0.610597	0.613	0.43	0.000652966
Sun2	4.81796e-08	0.758221	0.535	0.37	0.000653459
Cxcr4	4.94541e-08	1.25299	0.283	0.143	0.000670746
Flot1	5.25909e-08	0.728542	0.569	0.406	0.000713291
Arhgap30	5.51213e-08	0.390958	0.905	0.855	0.00074761
Patz1	5.56803e-08	0.724471	0.512	0.33	0.000755192
Uba7	5.58838e-08	1.02573	0.303	0.154	0.000757952
Chst15	5.69169e-08	1.39049	0.197	0.076	0.000771965
Reep5	5.78556e-08	-0.496978	0.659	0.784	0.000784695
Zfp266	5.93317e-08	0.718462	0.503	0.335	0.000804717
Arhgef1	6.25001e-08	0.338447	0.96	0.967	0.000847689
Ctsl	6.26451e-08	0.655505	0.595	0.411	0.000849656
Anxa2	6.30519e-08	-0.398434	0.697	0.883	0.000855173
Cpne8	6.34745e-08	-1.69533	0.121	0.264	0.000860904
Nme4	6.46839e-08	-0.944206	0.272	0.428	0.000877308
Tkt	6.4926e-08	-0.347251	0.945	0.99	0.000880591
Mob3a	6.59297e-08	0.589231	0.627	0.473	0.000894205
Lman2l	6.59518e-08	0.927216	0.384	0.223	0.000894504
Rac2	7.10287e-08	0.200711	1	1	0.000963363
Slc9a3r1	7.70559e-08	0.310289	0.988	0.962	0.00104511
Sema4d	7.70992e-08	0.543483	0.699	0.537	0.0010457
Marcksl1	7.81053e-08	0.335937	0.988	0.945	0.00105934
Rcsd1	7.81086e-08	0.460061	0.867	0.807	0.00105939
Rpl26	8.14609e-08	-0.131036	1	1	0.00110485
Ctbp1	8.1893e-08	0.488966	0.818	0.675	0.00111071
Gid8	8.20977e-08	0.681909	0.566	0.396	0.00111349
Mxd4	8.33171e-08	0.566698	0.74	0.608	0.00113003
Trim11	8.4758e-08	0.950024	0.312	0.161	0.00114957
Il16	8.94679e-08	0.529961	0.751	0.622	0.00121345
Rps15	9.05833e-08	-0.202223	1	1	0.00122858
Mrto4	9.32825e-08	-0.604603	0.48	0.644	0.00126519
Ndufs6	9.84226e-08	-0.425371	0.711	0.872	0.00133491
Tmem229b	1.02581e-07	0.736665	0.448	0.269	0.00139131
Cat	1.04966e-07	0.560588	0.665	0.494	0.00142365
Tlr12	1.13211e-07	1.32034	0.211	0.088	0.00153549
Dtx3	1.1339e-07	0.767286	0.488	0.321	0.00153791
Ndufb8	1.15248e-07	-0.320308	0.954	0.984	0.0015631
Rpl24	1.16455e-07	-0.131177	1	1	0.00157948
Prkcb	1.19934e-07	0.742791	0.52	0.359	0.00162666
Hmgb1	1.19944e-07	0.296711	1	1	0.0016268
Tyms	1.21161e-07	-0.376852	0.327	0.542	0.0016433
Pgs1	1.21253e-07	0.665112	0.642	0.491	0.00164456
Mgat1	1.22566e-07	0.803333	0.419	0.254	0.00166236
Lmbr1l	1.29166e-07	0.842327	0.384	0.225	0.00175187
Card9	1.31188e-07	1.2177	0.199	0.079	0.00177931
Atp5c1	1.31641e-07	-0.233096	1	1	0.00178544
Ei24	1.3175e-07	0.986717	0.355	0.206	0.00178692
Kdm5a	1.36356e-07	0.59649	0.624	0.453	0.00184939
Wnt8b	1.39522e-07	1.08383	0.28	0.14	0.00189234
Bbc3	1.39848e-07	1.39487	0.165	0.057	0.00189676
Atxn10	1.43804e-07	0.35156	0.893	0.834	0.00195042
Hes6	1.44605e-07	0.493303	0.717	0.58	0.00196128
Wdr78	1.5041e-07	1.25736	0.202	0.083	0.00204002
Rpl4	1.53569e-07	-0.15484	1	1	0.00208286
Cass4	1.55537e-07	1.85827	0.124	0.035	0.00210954
D16Ertd472e	1.5947e-07	0.636966	0.63	0.492	0.00216289
Bola3	1.61292e-07	-0.573613	0.529	0.698	0.0021876
Rps24	1.67701e-07	0.0917114	1	1	0.00227453
Trpv2	1.6799e-07	0.536887	0.685	0.551	0.00227845
Usp7	1.68918e-07	0.638564	0.532	0.366	0.00229103
mt-Nd1	1.77093e-07	-0.196215	1	1	0.00240192
Zbtb8b	1.77763e-07	1.12049	0.327	0.181	0.00241099
Tomm7	1.77822e-07	-0.26301	0.988	0.995	0.0024118
Nkd1	1.80814e-07	1.43186	0.171	0.062	0.00245238
Rbm7	1.82501e-07	0.575521	0.613	0.466	0.00247527
Stat4	1.83022e-07	0.77059	0.457	0.288	0.00248233
Pdlim1	1.88974e-07	-0.512794	0.572	0.729	0.00256306
Eif4ebp1	1.94427e-07	-1.25721	0.09	0.225	0.00263702
Gm43352	2.06739e-07	1.21164	0.269	0.133	0.002804
Rwdd2a	2.17288e-07	1.54535	0.173	0.066	0.00294708
Rbpms2	2.19284e-07	1.58104	0.136	0.041	0.00297414
Tmc8	2.31156e-07	0.764405	0.471	0.307	0.00313517
Stk4	2.35723e-07	0.591613	0.682	0.53	0.00319711
Txnip	2.43385e-07	0.59506	0.645	0.494	0.00330103
Rps11	2.44914e-07	-0.108864	1	1	0.00332177
Cnn3	2.47712e-07	1.41702	0.251	0.124	0.00335971
Aff1	2.53124e-07	1.11535	0.292	0.154	0.00343312
Timm13	2.54858e-07	-0.328292	0.916	0.95	0.00345664
Sh2d2a	2.56207e-07	0.415525	0.899	0.826	0.00347493
Smim14	2.60296e-07	0.681608	0.491	0.325	0.00353039
Ypel5	2.63111e-07	0.723251	0.41	0.25	0.00356857
Fam102a	2.66493e-07	0.776512	0.488	0.339	0.00361445
Gm6213	2.67036e-07	-1.19765	0.15	0.292	0.00362181
2610035D17Rik	2.70112e-07	1.48563	0.171	0.064	0.00366352
Galnt12	2.71079e-07	0.50384	0.717	0.613	0.00367665
Pacsin1	2.76723e-07	0.919669	0.364	0.214	0.0037532
Vav1	2.83879e-07	0.535817	0.682	0.575	0.00385025
Sdhb	2.84612e-07	-0.371812	0.882	0.964	0.0038602
Evi5l	2.86101e-07	1.66262	0.156	0.055	0.00388039
Serf2	2.909e-07	-0.158282	1	1	0.00394548
Itm2b	2.92426e-07	0.219428	1	1	0.00396618
Ccnd3	2.95203e-07	0.464004	0.861	0.829	0.00400384
Rnaset2b	3.12395e-07	1.40719	0.185	0.074	0.00423702
Mrpl21	3.12426e-07	-0.488308	0.578	0.734	0.00423743
Zfp553	3.18947e-07	0.913903	0.321	0.178	0.00432588
Palm	3.20248e-07	0.860029	0.382	0.23	0.00434353
Rpl31	3.26107e-07	-0.182952	1	1	0.00442299
Wdr33	3.36228e-07	0.38704	0.87	0.819	0.00456026
Prkcq	3.57538e-07	0.49106	0.723	0.558	0.00484929
Gsn	3.64986e-07	0.840972	0.431	0.28	0.0049503
Hmgn2	3.67396e-07	-0.258768	0.988	0.997	0.00498299

## Sheet: Up in CKO all
	p_val	avg_log2FC	pct.1	pct.2	p_val_adj
Gclm	2.63912e-79	-1.08659	1	1	3.57944e-75
Lgals1	4.20659e-64	-1.259	0.96	0.995	5.7054e-60
Tmsb4x	6.42829e-46	-0.629583	1	1	8.71869e-42
Vim	2.1459e-38	-1.80824	0.624	0.855	2.91048e-34
Trdv4	2.23342e-37	-1.09206	0.48	0.908	3.02918e-33
Ccr2	2.9357e-35	-1.94171	0.251	0.653	3.98169e-31
Rps2	4.49665e-31	-0.385621	1	1	6.09881e-27
Hint1	1.97976e-28	-0.619696	0.997	1	2.68514e-24
Ly6e	7.43864e-28	-0.726834	0.997	1	1.0089e-23
Ms4a4b	9.28876e-28	-3.01876	0.061	0.394	1.25983e-23
Emp3	3.00474e-26	-0.956575	0.688	0.908	4.07533e-22
Ms4a6b	3.85612e-25	-3.24072	0.04	0.335	5.23005e-21
Shisa5	5.79369e-25	-1.59071	0.269	0.625	7.85798e-21
Npm1	1.39798e-24	-0.436992	1	1	1.89608e-20
Mif	1.30756e-23	-0.527495	1	0.998	1.77345e-19
Itgb7	3.70376e-23	-1.30216	0.338	0.663	5.02341e-19
Actb	4.0064e-23	-0.318888	1	1	5.43388e-19
Prdx1	6.36703e-23	-0.586619	1	1	8.63561e-19
Myl6	9.79859e-23	-0.403548	1	1	1.32898e-18
Rpl14	1.47785e-22	-0.284167	1	1	2.00441e-18
Atp5g1	2.04193e-22	-0.603908	0.991	0.995	2.76946e-18
Rpl32	2.9805e-22	-0.207902	1	1	4.04246e-18
Gpx1	3.16817e-22	-0.513584	1	0.998	4.29699e-18
Hsp90b1	3.63513e-22	-0.799037	0.977	0.99	4.93032e-18
Psme2	3.77548e-22	-0.626648	0.971	0.995	5.12069e-18
Rps25	6.26092e-22	-0.423113	1	1	8.49168e-18
Cyba	2.08017e-21	-0.567739	0.968	0.991	2.82133e-17
Ppia	2.82081e-21	-0.341508	1	1	3.82587e-17
Rps26	6.53156e-21	-0.21288	1	1	8.85875e-17
Tagln2	8.4634e-21	-0.837188	0.754	0.905	1.14789e-16
Cox7b	9.49387e-21	-0.542611	0.96	0.993	1.28765e-16
Calr	3.59337e-20	-0.765605	0.876	0.962	4.87369e-16
Rpl22l1	1.50305e-19	-0.404528	1	1	2.03859e-15
Psma2	2.07969e-19	-0.481495	0.974	0.997	2.82068e-15
Fabp5	3.67308e-19	-0.579774	0.809	0.971	4.9818e-15
Rps27a	4.37867e-19	-0.167887	1	1	5.9388e-15
Tspo	4.76794e-19	-0.717424	0.847	0.946	6.46675e-15
Atp8b4	5.75299e-19	-1.43653	0.263	0.546	7.80278e-15
Flna	6.22933e-19	-0.871524	0.5	0.777	8.44884e-15
Cxcr6	6.60457e-19	-1.17795	0.428	0.684	8.95778e-15
Sh3bgrl3	1.91937e-18	-0.332526	1	1	2.60324e-14
Pdia3	3.08582e-18	-0.578482	0.986	0.995	4.1853e-14
Pdia6	3.97985e-18	-0.740531	0.893	0.96	5.39787e-14
Ldha	6.09171e-18	-0.403153	1	1	8.26219e-14
Rps27l	6.87346e-18	-0.52012	0.936	0.984	9.32248e-14
Atp5g3	9.41453e-18	-0.346421	1	1	1.27689e-13
Cox5a	9.6197e-18	-0.36966	0.997	1	1.30472e-13
Tmsb10	1.08164e-17	-0.321024	1	1	1.46703e-13
Eef1d	1.52569e-17	-0.461391	0.994	1	2.06929e-13
Cox5b	1.89097e-17	-0.403601	0.997	1	2.56472e-13
Psma3	2.26368e-17	-0.548324	0.954	0.978	3.07023e-13
Klf2	2.37612e-17	-1.1613	0.301	0.596	3.22274e-13
Gimap4	4.28698e-17	-2.09615	0.124	0.377	5.81442e-13
Ndufa13	6.8811e-17	-0.394397	0.991	0.998	9.33283e-13
Cox8a	6.98536e-17	-0.332199	1	1	9.47424e-13
Sec61b	1.65823e-16	-0.353799	1	1	2.24905e-12
Evl	2.50025e-16	-1.05089	0.364	0.623	3.39109e-12
Txn1	2.55153e-16	-0.535698	0.919	0.972	3.46065e-12
Eif5a	2.59177e-16	-0.359418	1	1	3.51522e-12
Samhd1	2.74523e-16	-1.52493	0.217	0.473	3.72335e-12
Rpl10a	3.39346e-16	-0.194535	1	1	4.60254e-12
Rps6	8.10173e-16	-0.248069	1	1	1.09884e-11
Sdf2l1	1.09014e-15	-0.916939	0.52	0.755	1.47856e-11
Snrpd1	1.34254e-15	-0.491593	0.974	0.991	1.82088e-11
Calm1	1.92098e-15	-0.38716	1	1	2.60542e-11
Cnn2	1.98221e-15	-0.520948	0.931	0.984	2.68847e-11
Ran	2.17184e-15	-0.424404	0.997	1	2.94566e-11
Bst2	2.23259e-15	-1.24478	0.324	0.573	3.02806e-11
S100a6	2.43294e-15	-1.38987	0.572	0.739	3.29979e-11
Actg1	3.5687e-15	-0.356288	1	1	4.84022e-11
Atp5j2	4.98187e-15	-0.310119	1	1	6.75691e-11
Uqcrb	5.40878e-15	-0.444052	0.974	0.988	7.33592e-11
Ly6a	7.08905e-15	-3.3161	0.023	0.204	9.61488e-11
Ssr4	7.6847e-15	-0.460708	0.98	0.979	1.04228e-10
Banf1	7.86142e-15	-0.469344	0.98	0.991	1.06624e-10
Nop10	1.14701e-14	-0.429655	0.986	0.997	1.55569e-10
Cks1b	1.37853e-14	-0.521482	0.569	0.85	1.8697e-10
Rpl41	2.38896e-14	-0.169111	1	1	3.24015e-10
Cox7a2	2.47877e-14	-0.376346	1	0.998	3.36196e-10
Phb	2.65576e-14	-0.689581	0.653	0.851	3.602e-10
Abracl	2.66039e-14	-0.497599	0.884	0.965	3.60829e-10
Cox6a1	2.7407e-14	-0.399276	0.988	0.998	3.71722e-10
Gm10282	3.08294e-14	-0.696192	0.595	0.839	4.18139e-10
Pclaf	6.87785e-14	-0.294808	0.699	0.921	9.32843e-10
Rbm3	7.09497e-14	-0.300069	1	1	9.6229e-10
Snrpf	7.33958e-14	-0.391541	0.994	0.997	9.95468e-10
Park7	1.49677e-13	-0.371574	0.997	0.998	2.03007e-09
Nhp2	2.16271e-13	-0.632922	0.699	0.879	2.93328e-09
Set	2.27619e-13	-0.473931	0.974	0.979	3.0872e-09
Cenpw	2.63696e-13	-0.942295	0.315	0.58	3.5765e-09
Rps13	2.96796e-13	-0.135143	1	1	4.02544e-09
Nt5c	3.22915e-13	-0.761004	0.442	0.689	4.37969e-09
Hspe1	3.58113e-13	-0.402737	0.994	0.997	4.85709e-09
Psmb5	4.76303e-13	-0.387605	0.977	0.998	6.4601e-09
Hspa5	6.10144e-13	-0.609718	0.928	0.962	8.27539e-09
Gng5	7.12381e-13	-0.259847	1	1	9.66202e-09
S100a10	7.64866e-13	-0.41204	0.994	0.997	1.03739e-08
Sptssa	1.15964e-12	-0.643764	0.642	0.829	1.57282e-08
Atp5j	1.1937e-12	-0.329255	1	1	1.61902e-08
Rpsa	1.24148e-12	-0.154333	1	1	1.68382e-08
Mrpl42	1.26146e-12	-0.668458	0.636	0.822	1.71091e-08
Dctpp1	1.64432e-12	-0.527163	0.763	0.927	2.23019e-08
Pfdn6	2.83394e-12	-0.663269	0.595	0.8	3.84368e-08
Sec61g	3.08219e-12	-0.341672	1	0.998	4.18037e-08
Psmb3	3.41716e-12	-0.35063	0.997	0.998	4.6347e-08
Klk8	3.76404e-12	-0.600124	0.673	0.846	5.10516e-08
D8Ertd738e	4.23585e-12	-0.438274	0.951	0.974	5.74508e-08
Rplp1	5.6971e-12	-0.158969	1	1	7.72697e-08
Cd52	5.84031e-12	-0.314616	1	1	7.92121e-08
Cenpx	8.07491e-12	-0.632136	0.618	0.82	1.0952e-07
Chchd1	8.29167e-12	-0.574639	0.691	0.86	1.1246e-07
Atp5h	8.42014e-12	-0.323342	0.997	0.998	1.14202e-07
Rpl27a	8.98118e-12	-0.145855	1	1	1.21812e-07
Psma1	1.17478e-11	-0.539996	0.754	0.879	1.59336e-07
Psmb1	1.43741e-11	-0.324686	1	0.998	1.94957e-07
Nedd8	1.49274e-11	-0.385004	0.98	0.993	2.0246e-07
Nkg7	1.73157e-11	-0.729277	0.538	0.741	2.34852e-07
Cfl1	1.96927e-11	-0.191434	1	1	2.67093e-07
Uqcr11	2.07135e-11	-0.398685	0.922	0.974	2.80937e-07
Eif4a1	2.41669e-11	-0.26517	1	1	3.27776e-07
Uqcc2	3.00873e-11	-0.530227	0.789	0.902	4.08074e-07
Ppa1	3.88246e-11	-0.767532	0.373	0.606	5.26578e-07
Atp5l	4.45451e-11	-0.273621	0.997	1	6.04166e-07
Elob	4.75642e-11	-0.327666	0.997	1	6.45113e-07
Btf3	5.43327e-11	-0.213568	1	1	7.36914e-07
C1qbp	5.52772e-11	-0.479882	0.824	0.936	7.49725e-07
Cox6c	6.84818e-11	-0.270641	1	1	9.28818e-07
Fkbp2	7.88746e-11	-0.825808	0.436	0.632	1.06978e-06
Manf	1.34278e-10	-0.552539	0.968	0.981	1.82121e-06
Cotl1	1.35472e-10	-0.485416	0.775	0.903	1.8374e-06
Psmb7	1.38592e-10	-0.544905	0.616	0.812	1.87972e-06
Rps17	1.47897e-10	-0.235403	1	1	2.00593e-06
Tesc	1.54265e-10	-1.32388	0.22	0.406	2.0923e-06
Rps5	1.6142e-10	-0.11859	1	1	2.18934e-06
Prr13	2.04053e-10	-0.703142	0.578	0.741	2.76757e-06
Nop58	2.46274e-10	-0.610061	0.636	0.827	3.34022e-06
Psme2b	2.64771e-10	-1.74141	0.107	0.275	3.59109e-06
Rpl7a	2.67737e-10	-0.178736	1	1	3.63131e-06
Snrpd3	2.95941e-10	-0.374313	0.962	0.978	4.01384e-06
Ndufa4	3.35831e-10	-0.284594	0.994	1	4.55488e-06
Lsm4	3.59038e-10	-0.377343	0.962	0.988	4.86963e-06
Gsto1	3.75365e-10	-1.50038	0.142	0.32	5.09108e-06
Lsm7	4.44191e-10	-0.418229	0.916	0.976	6.02456e-06
Atp5f1	4.55104e-10	-0.271348	0.997	0.998	6.17257e-06
Bag1	4.8242e-10	-0.572495	0.711	0.839	6.54306e-06
Eny2	5.17362e-10	-0.503598	0.691	0.846	7.01699e-06
Sf3b6	5.31908e-10	-0.349925	0.965	0.984	7.21426e-06
Ndufb6	6.10311e-10	-0.415008	0.867	0.955	8.27765e-06
Hist1h2ae	6.68985e-10	-0.418376	0.624	0.841	9.07344e-06
Ostc	6.93002e-10	-0.429054	0.908	0.955	9.39919e-06
Arhgdib	6.93744e-10	-0.272941	1	1	9.40925e-06
Atp5e	7.4276e-10	-0.249189	1	1	1.00741e-05
Tma7	7.44905e-10	-0.297829	1	0.998	1.01031e-05
Lmo4	9.35637e-10	-1.13106	0.353	0.522	1.269e-05
Hmgb2	1.06578e-09	-0.247306	0.98	0.998	1.44551e-05
Pa2g4	1.07228e-09	-0.383598	0.98	0.991	1.45433e-05
Tomm20	1.08052e-09	-0.345542	0.968	0.993	1.46551e-05
Fam162a	1.27715e-09	-0.637376	0.54	0.718	1.7322e-05
Uqcr10	1.35285e-09	-0.375575	0.971	0.991	1.83487e-05
Hspd1	1.38225e-09	-0.511838	0.847	0.94	1.87474e-05
Cetn3	1.43024e-09	-0.595833	0.555	0.753	1.93983e-05
Myl12a	1.58411e-09	-0.308561	0.997	0.998	2.14853e-05
Ncl	1.63488e-09	-0.350717	0.991	1	2.21739e-05
Mrps14	1.83168e-09	-0.472787	0.835	0.919	2.4843e-05
Hsp90aa1	1.87534e-09	-0.378378	0.988	0.993	2.54352e-05
H2afj	1.94246e-09	-0.344272	0.983	0.991	2.63456e-05
Hprt	1.98518e-09	-0.523316	0.653	0.819	2.6925e-05
H2afz	2.05528e-09	-0.279467	1	1	2.78757e-05
1810037I17Rik	2.45542e-09	-0.525491	0.662	0.851	3.33028e-05
Magoh	3.00539e-09	-0.420586	0.775	0.917	4.07621e-05
Dbi	3.08167e-09	-0.346114	0.951	0.995	4.17967e-05
Ost4	4.05352e-09	-0.354601	0.957	0.979	5.49778e-05
Sh2d1a	4.1316e-09	-0.464046	0.691	0.832	5.60369e-05
Gmnn	5.92655e-09	-0.482501	0.405	0.646	8.03818e-05
Sec11c	6.26755e-09	-0.556022	0.763	0.857	8.50067e-05
Cox7c	6.43751e-09	-0.251591	1	0.998	8.73119e-05
Ndufa12	6.50485e-09	-0.435012	0.777	0.922	8.82253e-05
Tomm5	6.65261e-09	-0.52049	0.691	0.846	9.02294e-05
Fam83a	6.96756e-09	-1.20305	0.179	0.351	9.4501e-05
Cd7	7.536e-09	-1.21092	0.142	0.313	0.000102211
Ndufb7	8.16477e-09	-0.353691	0.96	0.988	0.000110739
Psme1	9.13513e-09	-0.302354	0.983	0.997	0.0001239
Psmb2	1.0158e-08	-0.336859	0.974	0.991	0.000137773
Arpc1b	1.04752e-08	-0.289421	0.991	0.995	0.000142075
Tmem258	1.14646e-08	-0.295912	0.988	0.995	0.000155495
Nucks1	1.31391e-08	-0.491414	0.514	0.713	0.000178205
Psma7	1.40667e-08	-0.310054	0.986	0.997	0.000190787
Rasgrp2	1.8153e-08	-0.616036	0.549	0.732	0.000246209
Ptges3	2.41021e-08	-0.465907	0.743	0.889	0.000326897
Sfr1	2.45977e-08	-0.473853	0.685	0.838	0.000333618
Ptma	2.47876e-08	-0.149384	1	1	0.000336195
Mrpl20	2.53557e-08	-0.451653	0.795	0.877	0.000343899
Rpl3	3.08106e-08	-0.167644	1	1	0.000417884
Snrpd2	3.38153e-08	-0.323026	0.974	0.986	0.000458637
Rpl10	3.54257e-08	-0.148978	1	1	0.000480479
Canx	3.66569e-08	-0.404211	0.908	0.946	0.000497177
Cenpa	4.15918e-08	-0.419955	0.318	0.532	0.00056411
Mrps24	4.76737e-08	-0.380043	0.841	0.919	0.000646598
Reep5	5.78556e-08	-0.496978	0.659	0.784	0.000784695
Anxa2	6.30519e-08	-0.398434	0.697	0.883	0.000855173
Cpne8	6.34745e-08	-1.69533	0.121	0.264	0.000860904
Nme4	6.46839e-08	-0.944206	0.272	0.428	0.000877308
Tkt	6.4926e-08	-0.347251	0.945	0.99	0.000880591
Rpl26	8.14609e-08	-0.131036	1	1	0.00110485
Rps15	9.05833e-08	-0.202223	1	1	0.00122858
Mrto4	9.32825e-08	-0.604603	0.48	0.644	0.00126519
Ndufs6	9.84226e-08	-0.425371	0.711	0.872	0.00133491
Ndufb8	1.15248e-07	-0.320308	0.954	0.984	0.0015631
Rpl24	1.16455e-07	-0.131177	1	1	0.00157948
Tyms	1.21161e-07	-0.376852	0.327	0.542	0.0016433
Atp5c1	1.31641e-07	-0.233096	1	1	0.00178544
Rpl4	1.53569e-07	-0.15484	1	1	0.00208286
Bola3	1.61292e-07	-0.573613	0.529	0.698	0.0021876
mt-Nd1	1.77093e-07	-0.196215	1	1	0.00240192
Tomm7	1.77822e-07	-0.26301	0.988	0.995	0.0024118
Pdlim1	1.88974e-07	-0.512794	0.572	0.729	0.00256306
Eif4ebp1	1.94427e-07	-1.25721	0.09	0.225	0.00263702
Rps11	2.44914e-07	-0.108864	1	1	0.00332177
Timm13	2.54858e-07	-0.328292	0.916	0.95	0.00345664
Gm6213	2.67036e-07	-1.19765	0.15	0.292	0.00362181
Sdhb	2.84612e-07	-0.371812	0.882	0.964	0.0038602
Serf2	2.909e-07	-0.158282	1	1	0.00394548
Mrpl21	3.12426e-07	-0.488308	0.578	0.734	0.00423743
Rpl31	3.26107e-07	-0.182952	1	1	0.00442299
Hmgn2	3.67396e-07	-0.258768	0.988	0.997	0.00498299

## Sheet: Down in cKO all
	p_val	avg_log2FC	pct.1	pct.2	p_val_adj
Rps7	6.85546e-73	0.499054	1	1	9.29806e-69
Mzb1	2.73805e-65	2.86678	0.734	0.214	3.71361e-61
Endou	7.78553e-63	1.93528	0.873	0.466	1.05595e-58
Id3	2.48201e-60	2.58043	0.702	0.157	3.36635e-56
Rpl13a	6.86853e-60	0.915979	1	0.974	9.31578e-56
Ighm	2.31026e-55	1.76788	0.873	0.43	3.1334e-51
Sdc4	2.36476e-53	3.42462	0.514	0.076	3.20733e-49
Ilvbl	1.79558e-46	1.64514	0.85	0.504	2.43535e-42
Pdlim4	2.12063e-44	1.87786	0.72	0.301	2.87622e-40
Il21r	2.22568e-44	1.69699	0.775	0.358	3.01869e-40
Sox13	5.39246e-42	1.27503	0.908	0.646	7.3138e-38
Uba52	3.2283e-41	0.550586	1	1	4.37854e-37
Ramp1	4.95385e-41	1.00868	0.98	0.798	6.7189e-37
Rgs10	4.89704e-40	1.27216	0.919	0.667	6.64185e-36
Epcam	1.85114e-39	2.32061	0.535	0.143	2.5107e-35
St6gal1	4.52831e-39	1.56436	0.754	0.373	6.14175e-35
Abi3	3.85821e-38	0.994793	0.954	0.77	5.23288e-34
Blk	2.47685e-35	0.774915	0.983	0.872	3.35935e-31
Tsc22d4	1.01821e-34	0.69492	0.994	0.974	1.381e-30
Ampd1	7.74111e-34	3.01288	0.376	0.064	1.04993e-29
Aqp11	2.73712e-33	2.06472	0.642	0.29	3.71236e-29
Ccr9	3.65364e-32	0.769617	0.997	0.978	4.95544e-28
Ifngr1	6.28117e-32	0.613787	1	0.99	8.51915e-28
Gapdh	1.55855e-31	0.512053	1	1	2.11386e-27
Gpr25	2.60892e-31	1.29455	0.792	0.465	3.53848e-27
Prrt1	2.77713e-31	1.27072	0.795	0.497	3.76662e-27
Eef2	4.35131e-31	0.409956	1	1	5.90168e-27
Tcrg-V4	4.75163e-30	1.74498	0.613	0.24	6.44464e-26
Tcf12	1.0302e-29	1.49292	0.694	0.366	1.39726e-25
Etv5	6.60466e-29	1.63617	0.633	0.288	8.95791e-25
Ubc	1.75697e-28	1.01954	0.864	0.589	2.38297e-24
Nrros	2.80781e-28	1.17584	0.803	0.515	3.80824e-24
Rorc	5.75851e-28	0.908302	0.931	0.782	7.81027e-24
Pdcd1	1.08617e-26	1.08192	0.855	0.511	1.47317e-22
Atp1b1	4.10743e-26	2.13872	0.419	0.123	5.57091e-22
Lat	2.6791e-25	0.480048	1	1	3.63367e-21
Ypel3	8.57853e-25	0.764013	0.971	0.886	1.16351e-20
Parm1	1.08269e-24	4.10034	0.202	0.01	1.46846e-20
Smox	1.38441e-24	0.974899	0.85	0.62	1.87767e-20
Iqch	1.97282e-24	1.26809	0.725	0.437	2.67573e-20
Tspan13	2.67727e-24	0.867909	0.887	0.651	3.63118e-20
Sla	9.34424e-24	0.82262	0.931	0.807	1.26736e-19
Gata3	1.08796e-23	0.818223	0.942	0.798	1.47561e-19
Gpr162	1.83617e-23	4.60077	0.188	0.009	2.4904e-19
Hmga1	2.34984e-23	0.604541	0.983	0.952	3.18709e-19
Gm13652	3.03939e-23	2.20674	0.376	0.107	4.12233e-19
Cd3d	5.59727e-23	0.432399	1	0.998	7.59158e-19
Abcb9	8.18752e-23	1.19518	0.688	0.39	1.11047e-18
Cxcr5	1.07475e-22	2.10536	0.379	0.112	1.45768e-18
Art1	2.64301e-22	1.9215	0.379	0.111	3.58472e-18
Rpl29	4.81219e-22	0.257551	1	1	6.52677e-18
Man1a	6.45628e-22	1.6299	0.514	0.223	8.75665e-18
Trdv5	1.37212e-21	1.86416	0.384	0.117	1.86101e-17
Ergic1	1.57558e-21	1.01794	0.754	0.485	2.13696e-17
Dck	2.65131e-21	0.976201	0.769	0.53	3.59597e-17
Slc11a2	6.48504e-21	1.27259	0.627	0.339	8.79566e-17
Rasal3	6.50465e-21	0.774023	0.905	0.762	8.82225e-17
Ppp1cc	1.57447e-20	0.515649	0.988	0.986	2.13545e-16
Ucp2	2.33932e-20	0.370318	1	1	3.17282e-16
Cd5	3.43904e-20	1.66418	0.419	0.154	4.66437e-16
Tbxa2r	5.30935e-20	1.37249	0.566	0.282	7.20107e-16
Podnl1	5.46276e-20	1.22584	0.633	0.359	7.40914e-16
Arpp21	5.77626e-20	1.73176	0.457	0.183	7.83435e-16
Chchd2	1.01576e-19	0.388471	1	0.998	1.37767e-15
Trgv2	3.75109e-19	0.947398	0.873	0.667	5.0876e-15
D430041D05Rik	4.11141e-19	2.87055	0.225	0.038	5.5763e-15
Syt13	4.46995e-19	2.1749	0.312	0.088	6.06259e-15
Heg1	5.49447e-19	1.05755	0.699	0.472	7.45215e-15
Nebl	6.90748e-19	0.636889	0.948	0.782	9.36861e-15
Klc3	7.75609e-19	1.77316	0.361	0.119	1.05196e-14
Notch3	1.29646e-18	1.80692	0.332	0.098	1.7584e-14
Zap70	1.2966e-18	0.650398	0.965	0.921	1.75857e-14
Capn3	1.54577e-18	1.25094	0.633	0.375	2.09653e-14
Pcbp2	1.66409e-18	0.40194	1	0.997	2.25701e-14
Cd6	1.79936e-18	1.26734	0.598	0.337	2.44047e-14
Ano6	1.97759e-18	0.978345	0.72	0.466	2.68221e-14
Rasgrp1	3.39425e-18	0.603004	0.98	0.886	4.60362e-14
Hdac7	8.56259e-18	0.718208	0.882	0.71	1.16134e-13
Ptpn7	1.02845e-17	0.660698	0.948	0.888	1.39489e-13
Gm37552	1.41392e-17	1.67209	0.384	0.145	1.9177e-13
Xlr4b	1.69041e-17	1.01258	0.676	0.439	2.29271e-13
Myb	1.72999e-17	0.7764	0.864	0.693	2.34639e-13
Plekhf1	2.41579e-17	1.03884	0.642	0.375	3.27654e-13
Cyb5a	2.88372e-17	0.57938	0.977	0.934	3.91119e-13
Kbtbd11	3.8817e-17	0.761054	0.806	0.596	5.26475e-13
Colq	3.96609e-17	2.0849	0.312	0.098	5.37921e-13
Dgkeos	6.1943e-17	1.43047	0.483	0.23	8.40133e-13
Tmem121	7.32116e-17	1.18689	0.538	0.287	9.9297e-13
Slc35b4	8.82705e-17	1.21523	0.546	0.299	1.19721e-12
Stx6	1.16584e-16	1.01309	0.601	0.337	1.58122e-12
Sla2	1.1821e-16	0.708459	0.855	0.649	1.60328e-12
Cd247	1.33559e-16	0.546918	0.991	0.971	1.81146e-12
Ikzf1	1.91247e-16	0.87186	0.734	0.494	2.59388e-12
Hsdl1	1.92881e-16	1.76071	0.327	0.109	2.61605e-12
Gfra1	2.02166e-16	2.34686	0.251	0.064	2.74198e-12
Bcl2	2.98813e-16	1.08168	0.613	0.351	4.05281e-12
Il17a	3.16618e-16	3.48869	0.263	0.076	4.29429e-12
Lamp1	3.6362e-16	0.646695	0.87	0.691	4.93178e-12
St8sia1	4.11067e-16	1.57118	0.358	0.133	5.5753e-12
Sox4	4.28502e-16	0.741929	0.928	0.781	5.81178e-12
Pstpip1	4.86839e-16	0.756827	0.812	0.62	6.60299e-12
Psap	8.23287e-16	0.54788	0.974	0.896	1.11662e-11
Rsrp1	8.83819e-16	0.503555	0.986	0.969	1.19872e-11
Cd164	1.09202e-15	0.695838	0.905	0.732	1.48111e-11
Btg1	1.34285e-15	0.895562	0.772	0.572	1.82131e-11
Camk2d	1.66874e-15	0.520399	0.991	0.934	2.26331e-11
Tecpr1	2.20317e-15	1.02724	0.659	0.446	2.98815e-11
Tpt1	3.41258e-15	0.182511	1	1	4.62849e-11
Ftl1	3.50976e-15	0.304537	1	1	4.76029e-11
Chmp1b	3.51926e-15	1.01826	0.627	0.404	4.77317e-11
Klf3	5.27818e-15	1.02972	0.653	0.439	7.15879e-11
Rabgap1l	5.63875e-15	0.809134	0.751	0.566	7.64784e-11
Pde6a	7.45518e-15	2.02819	0.263	0.078	1.01115e-10
Trp53i11	9.04276e-15	1.03599	0.647	0.428	1.22647e-10
Fbln2	9.95511e-15	1.83516	0.338	0.131	1.35021e-10
Zfp219	1.14995e-14	1.215	0.509	0.276	1.55967e-10
Jakmip1	1.22426e-14	0.77537	0.746	0.522	1.66047e-10
Ets1	1.37462e-14	0.468044	0.971	0.933	1.8644e-10
Serinc3	1.81717e-14	0.983054	0.621	0.402	2.46463e-10
Ppm1e	2.24311e-14	2.20674	0.185	0.035	3.04233e-10
Nfkbie	2.34642e-14	1.42285	0.408	0.185	3.18245e-10
Midn	2.38359e-14	0.824523	0.717	0.525	3.23286e-10
Fam167a	2.51513e-14	1.51538	0.379	0.164	3.41127e-10
Elf1	2.57874e-14	0.592621	0.922	0.841	3.49755e-10
Cxxc5	2.58184e-14	1.48309	0.425	0.211	3.50175e-10
Lipa	2.90103e-14	0.807269	0.754	0.56	3.93466e-10
Zyx	3.64581e-14	0.810003	0.746	0.551	4.94481e-10
Csrnp1	3.85686e-14	1.23696	0.506	0.283	5.23105e-10
Dynlt1b	4.24793e-14	1.43613	0.399	0.185	5.76147e-10
Sipa1	4.54852e-14	0.943743	0.61	0.389	6.16916e-10
Arhgap45	4.86807e-14	0.510653	0.974	0.927	6.60256e-10
Prkd2	5.21699e-14	0.949242	0.621	0.385	7.0758e-10
1110008P14Rik	5.62238e-14	0.718008	0.789	0.591	7.62564e-10
Dclre1c	7.10879e-14	1.5204	0.341	0.135	9.64165e-10
1700012B07Rik	9.55186e-14	0.859774	0.711	0.492	1.29552e-09
Ppt2	1.14559e-13	0.796786	0.668	0.434	1.55376e-09
Dhrs3	1.31082e-13	3.10269	0.15	0.022	1.77786e-09
Pnrc1	1.48827e-13	0.649682	0.945	0.843	2.01853e-09
Eif2s3y	1.60235e-13	1.14702	0.454	0.23	2.17327e-09
Bach1	1.65655e-13	1.25669	0.46	0.24	2.24678e-09
Il17rb	1.67633e-13	1.36649	0.318	0.117	2.27361e-09
Rab27a	1.83981e-13	0.871459	0.682	0.489	2.49534e-09
Fkbp1a	1.93146e-13	0.43665	0.977	0.972	2.61964e-09
Kcna3	2.01038e-13	1.02851	0.572	0.366	2.72667e-09
Pdcd4	2.01895e-13	0.930781	0.607	0.37	2.7383e-09
Eng	2.0488e-13	1.25118	0.436	0.219	2.77878e-09
Ppp1r14b	2.11029e-13	0.537435	0.968	0.922	2.86219e-09
H13	2.22662e-13	0.609113	0.873	0.767	3.01997e-09
Arl6ip1	2.53105e-13	0.424529	0.994	0.998	3.43287e-09
mt-Atp8	3.40193e-13	0.266814	1	1	4.61404e-09
Rpl27	4.22489e-13	0.187634	1	1	5.73022e-09
Inpp5b	4.41514e-13	1.03072	0.512	0.29	5.98825e-09
Lef1	4.55976e-13	0.72379	0.861	0.737	6.18441e-09
Hist3h2ba	4.81379e-13	1.32982	0.471	0.245	6.52894e-09
Tm6sf1	5.29601e-13	1.3147	0.393	0.187	7.18298e-09
Prps2	5.55409e-13	0.811575	0.668	0.449	7.53301e-09
Ckb	6.11175e-13	0.562748	0.977	0.952	8.28937e-09
Plxnd1	6.17339e-13	1.0206	0.517	0.295	8.37297e-09
Coro2b	6.22461e-13	0.905344	0.584	0.354	8.44244e-09
Plcl1	6.73494e-13	1.75402	0.257	0.085	9.1346e-09
Arhgap4	6.83522e-13	0.791784	0.697	0.522	9.27061e-09
Gm11808	7.34362e-13	0.837375	0.653	0.446	9.96015e-09
Lax1	7.7085e-13	0.859277	0.645	0.439	1.0455e-08
Elovl5	9.25506e-13	0.897301	0.624	0.427	1.25526e-08
Rps27	9.58133e-13	0.211753	1	1	1.29952e-08
Itk	1.20824e-12	0.657379	0.812	0.636	1.63873e-08
Agfg2	1.224e-12	0.822435	0.616	0.385	1.66011e-08
Hspa8	1.2343e-12	0.290828	1	1	1.67408e-08
Xlr4a	1.26758e-12	0.8311	0.694	0.522	1.71922e-08
Syk	1.35516e-12	2.0146	0.202	0.052	1.838e-08
Fam210b	1.60662e-12	1.74279	0.237	0.073	2.17906e-08
Bcl11b	1.65558e-12	0.503556	0.96	0.867	2.24546e-08
Spint2	1.77586e-12	0.614591	0.858	0.791	2.4086e-08
Cirbp	2.34225e-12	0.592549	0.827	0.665	3.17679e-08
Tbc1d10c	2.84569e-12	0.47455	0.962	0.927	3.85962e-08
Malat1	3.04947e-12	0.48282	1	0.998	4.13599e-08
Phf10	3.26419e-12	1.15783	0.402	0.193	4.42722e-08
Igfbp4	5.04732e-12	0.472473	0.59	0.295	6.84568e-08
Nlrx1	5.14771e-12	1.66828	0.327	0.147	6.98184e-08
Myl10	5.18636e-12	1.2565	0.491	0.287	7.03426e-08
Znrf1	5.44608e-12	0.505127	0.96	0.874	7.38651e-08
Gng10	5.88712e-12	0.955095	0.561	0.358	7.98471e-08
Sytl1	5.96948e-12	0.868871	0.624	0.416	8.09641e-08
Dnm2	6.24129e-12	0.666212	0.74	0.549	8.46506e-08
Arvcf	7.10417e-12	2.16906	0.185	0.047	9.63539e-08
Brf1	9.04303e-12	0.893034	0.581	0.378	1.22651e-07
Arhgap26	9.84595e-12	1.93544	0.188	0.048	1.33541e-07
Cd47	1.05697e-11	0.41005	0.994	0.969	1.43357e-07
Rnf114	1.09407e-11	0.640032	0.777	0.618	1.48389e-07
1700048O20Rik	1.48932e-11	1.97801	0.217	0.067	2.01996e-07
Def6	1.52604e-11	0.456923	0.951	0.877	2.06977e-07
Fxyd7	1.55704e-11	2.72142	0.142	0.026	2.11181e-07
Rnf166	1.64158e-11	0.620156	0.751	0.57	2.22647e-07
Ptprf	2.24052e-11	1.17889	0.408	0.211	3.03881e-07
St3gal6	2.37092e-11	1.54083	0.318	0.142	3.21569e-07
Map4k2	2.37318e-11	0.733931	0.673	0.48	3.21875e-07
Cd3g	2.48772e-11	0.387956	0.997	0.988	3.3741e-07
Nrip1	2.4964e-11	0.56493	0.824	0.658	3.38586e-07
Zfp36l2	2.51913e-11	0.902311	0.572	0.354	3.4167e-07
Gm9493	2.83759e-11	0.388331	0.98	0.94	3.84863e-07
Zfp36l1	2.93831e-11	0.847347	0.682	0.515	3.98523e-07
Tox	3.10494e-11	0.614232	0.815	0.618	4.21123e-07
Armc7	3.19353e-11	0.933614	0.546	0.339	4.33139e-07
Neil1	3.56883e-11	1.45521	0.292	0.119	4.8404e-07
Esrp1	3.93114e-11	3.06472	0.127	0.021	5.33181e-07
Ube2v1	4.15694e-11	1.0503	0.422	0.221	5.63806e-07
Cd27	4.25784e-11	0.554269	0.879	0.767	5.7749e-07
Nim1k	4.27289e-11	1.43395	0.289	0.117	5.79532e-07
Tnfsf11	4.28796e-11	1.04896	0.506	0.311	5.81576e-07
Smarcd2	4.3056e-11	0.665052	0.708	0.547	5.83969e-07
Klhl6	4.65252e-11	0.770077	0.621	0.42	6.31022e-07
Aagab	4.83471e-11	0.726908	0.679	0.491	6.55732e-07
Sh3bp5	5.05451e-11	1.00892	0.54	0.349	6.85543e-07
Lig4	5.7635e-11	1.1213	0.393	0.195	7.81703e-07
Arid5a	6.50986e-11	0.928565	0.564	0.375	8.82933e-07
Sh3kbp1	7.06472e-11	0.575991	0.893	0.72	9.58188e-07
Sirt2	7.29424e-11	0.925844	0.656	0.499	9.89318e-07
B630019A10Rik	7.58059e-11	1.27622	0.358	0.178	1.02816e-06
Wfs1	7.58699e-11	1.83025	0.191	0.055	1.02902e-06
Cdkn1c	7.77597e-11	1.47976	0.338	0.161	1.05465e-06
Satb1	1.00376e-10	0.617888	0.829	0.693	1.36141e-06
Nav2	1.0298e-10	0.657459	0.702	0.516	1.39672e-06
Xlr4c	1.10055e-10	1.23089	0.367	0.185	1.49268e-06
Eif2ak3	1.13697e-10	1.60339	0.266	0.105	1.54207e-06
Dgkd	1.49426e-10	0.954295	0.483	0.285	2.02666e-06
Git2	1.50499e-10	0.687777	0.711	0.532	2.04121e-06
H1f0	1.55447e-10	0.931423	0.688	0.515	2.10833e-06
Cd81	1.64848e-10	0.585943	0.812	0.648	2.23584e-06
Gm48321	1.90071e-10	1.86144	0.173	0.047	2.57793e-06
Ablim1	1.95594e-10	0.555295	0.829	0.658	2.65284e-06
Mpp1	2.12493e-10	0.815122	0.587	0.392	2.88205e-06
Tia1	2.17294e-10	0.57953	0.775	0.589	2.94716e-06
Fdx1	2.26302e-10	0.907247	0.546	0.356	3.06934e-06
Rbmx	2.32876e-10	0.778541	0.665	0.497	3.1585e-06
Tgfbr2	2.80564e-10	0.706449	0.717	0.544	3.80529e-06
Usp3	2.93741e-10	0.763904	0.595	0.406	3.984e-06
Irf2bpl	3.47278e-10	0.784713	0.616	0.42	4.71013e-06
Bmp7	3.51005e-10	2.28336	0.147	0.035	4.76068e-06
Ptpre	3.75075e-10	1.14226	0.393	0.207	5.08714e-06
Ptger4	4.24631e-10	1.03999	0.37	0.185	5.75927e-06
Tcrg-C2	4.99124e-10	0.695743	0.575	0.354	6.76962e-06
Itgb2	5.34985e-10	0.62929	0.714	0.522	7.25601e-06
Eif3f	5.57267e-10	0.2555	1	1	7.55821e-06
Mbp	6.08225e-10	0.8116	0.572	0.385	8.24936e-06
Arhgap9	6.45139e-10	0.502577	0.864	0.722	8.75003e-06
Hnrnpl	7.94309e-10	0.341325	0.991	0.981	1.07732e-05
Foxn3	8.1387e-10	0.636858	0.694	0.487	1.10385e-05
Tmem108	8.16729e-10	1.06036	0.399	0.216	1.10773e-05
Baz2a	8.50226e-10	0.769615	0.578	0.371	1.15316e-05
Tmem59	8.64362e-10	0.451757	0.884	0.767	1.17233e-05
A930003A15Rik	8.69847e-10	1.55493	0.246	0.098	1.17977e-05
Ptrh1	8.79482e-10	1.22639	0.318	0.149	1.19284e-05
Erh	8.81073e-10	0.610246	0.717	0.547	1.195e-05
Pabpc1	8.83109e-10	0.231301	1	1	1.19776e-05
Nav1	9.19194e-10	2.27331	0.124	0.024	1.2467e-05
Impdh1	9.34458e-10	0.635457	0.691	0.518	1.26741e-05
Gpr132	9.87879e-10	0.8599	0.488	0.297	1.33986e-05
P2rx7	9.88246e-10	0.843536	0.529	0.344	1.34036e-05
Arhgef3	1.05475e-09	0.966262	0.413	0.219	1.43056e-05
Gtf2h4	1.30967e-09	0.589951	0.746	0.587	1.7763e-05
Pglyrp2	1.35499e-09	0.646663	0.676	0.503	1.83777e-05
Lrrc42	1.67657e-09	0.721653	0.52	0.314	2.27393e-05
Slc25a41	1.70897e-09	1.92499	0.13	0.028	2.31788e-05
Nfkbia	2.18658e-09	0.538025	0.546	0.361	2.96566e-05
Tnfrsf1a	2.18812e-09	0.853312	0.532	0.347	2.96774e-05
Mynn	2.41584e-09	0.919948	0.422	0.237	3.2766e-05
Prkar1a	2.45024e-09	0.307854	1	0.99	3.32326e-05
Gm525	2.45383e-09	3.24529	0.15	0.041	3.32813e-05
Zfp36	2.74235e-09	0.912716	0.59	0.401	3.71945e-05
Gem	3.12656e-09	1.37684	0.22	0.083	4.24056e-05
Ppp1r3b	3.15591e-09	2.28532	0.136	0.033	4.28037e-05
Dnajb1	3.2246e-09	0.645996	0.685	0.556	4.37352e-05
Unc5cl	3.35825e-09	1.75687	0.191	0.066	4.5548e-05
Rtkn	3.52298e-09	1.35577	0.231	0.09	4.77822e-05
Igsf23	3.66307e-09	1.3134	0.272	0.119	4.96822e-05
Tmem151b	3.93118e-09	1.93781	0.176	0.057	5.33186e-05
Dzip1	4.02067e-09	2.41022	0.118	0.024	5.45323e-05
Abhd8	4.22051e-09	0.418214	0.928	0.883	5.72427e-05
Carmil2	4.5649e-09	0.676482	0.656	0.491	6.19137e-05
Cbx4	4.67135e-09	0.883804	0.448	0.264	6.33575e-05
Rps29	4.72766e-09	0.143855	1	1	6.41213e-05
Glcci1	4.94063e-09	1.19824	0.347	0.181	6.70097e-05
Slc38a1	5.84442e-09	0.470817	0.858	0.769	7.92679e-05
Fcho1	5.895e-09	0.660614	0.668	0.52	7.99539e-05
Dap	5.96947e-09	0.724757	0.52	0.339	8.09639e-05
5730559C18Rik	6.36491e-09	0.977655	0.367	0.195	8.63272e-05
Sesn3	6.5214e-09	0.761347	0.5	0.311	8.84497e-05
Arhgef2	7.37376e-09	0.684179	0.59	0.404	0.00010001
Sept9	7.57235e-09	0.384472	0.954	0.912	0.000102704
Sept1	8.14781e-09	0.231509	0.997	1	0.000110509
Lcp2	8.26261e-09	0.51602	0.824	0.68	0.000112066
Runx3	8.40849e-09	0.737398	0.639	0.48	0.000114044
Gm13855	8.45885e-09	2.27622	0.113	0.022	0.000114727
Yeats2	9.5746e-09	1.04235	0.373	0.206	0.00012986
Kcnn4	9.62349e-09	0.715245	0.592	0.432	0.000130523
Mtf2	1.01122e-08	0.613823	0.659	0.485	0.000137152
Gm10093	1.02893e-08	1.80692	0.162	0.05	0.000139553
Cnot2	1.04414e-08	0.688344	0.639	0.485	0.000141617
Mef2a	1.09763e-08	0.905521	0.488	0.314	0.000148871
Cd8a	1.15122e-08	0.974201	0.5	0.339	0.00015614
H3f3b	1.17987e-08	0.243424	1	1	0.000160026
Vezf1	1.24318e-08	0.898911	0.428	0.25	0.000168612
Bpgm	1.27316e-08	0.892538	0.41	0.237	0.000172678
Dennd1c	1.31286e-08	0.865648	0.451	0.273	0.000178063
Cux1	1.3783e-08	0.387563	0.899	0.801	0.000186939
Slc35d1	1.5004e-08	1.28974	0.338	0.185	0.000203499
Atg7	1.52322e-08	1.21228	0.298	0.147	0.000206594
Dusp2	1.54453e-08	0.856477	0.682	0.57	0.000209484
Traf4	1.70289e-08	0.555817	0.754	0.63	0.000230963
Ppp1r13b	1.89077e-08	1.40792	0.24	0.104	0.000256445
Cblb	1.94828e-08	0.833802	0.413	0.235	0.000264245
C030034L19Rik	1.99663e-08	0.977257	0.413	0.25	0.000270803
Wdr6	2.02158e-08	0.686355	0.587	0.416	0.000274187
Dennd2d	2.2086e-08	0.93025	0.419	0.247	0.000299553
Nck2	2.2485e-08	1.13809	0.376	0.219	0.000304964
Kdm5b	2.2941e-08	0.636227	0.662	0.509	0.000311149
Man2a2	2.45167e-08	0.96356	0.315	0.155	0.000332519
Ubald2	2.58892e-08	0.416095	0.922	0.82	0.000351135
Grcc10	2.64545e-08	0.370732	0.968	0.927	0.000358803
Kdm4b	3.08978e-08	1.10319	0.332	0.178	0.000419067
Ctsb	3.16362e-08	0.488317	0.792	0.649	0.000429082
Desi1	3.17339e-08	0.609753	0.708	0.544	0.000430407
Mettl9	3.17643e-08	0.543306	0.691	0.527	0.000430819
Btg2	3.23661e-08	0.681311	0.714	0.589	0.000438981
Msi2	3.31729e-08	0.859831	0.431	0.257	0.000449924
Mcl1	3.54504e-08	0.68025	0.543	0.359	0.000480813
Ctnnb1	3.5476e-08	0.549051	0.694	0.528	0.00048116
Plxdc2	3.55957e-08	1.10643	0.338	0.185	0.000482785
Ptk2b	3.63311e-08	0.805076	0.52	0.359	0.000492758
Mkrn1	3.70134e-08	0.567958	0.665	0.508	0.000502013
Eif4b	3.94006e-08	0.369731	0.948	0.87	0.000534391
Herc3	3.98346e-08	1.10084	0.344	0.192	0.000540277
Ppp1r9b	4.14123e-08	0.800797	0.393	0.219	0.000561675
Fyco1	4.18702e-08	0.750965	0.361	0.192	0.000567885
Rapgef3	4.62197e-08	1.28336	0.237	0.104	0.000626878
Narf	4.74014e-08	0.751155	0.526	0.354	0.000642905
Tomm34	4.81432e-08	0.610597	0.613	0.43	0.000652966
Sun2	4.81796e-08	0.758221	0.535	0.37	0.000653459
Cxcr4	4.94541e-08	1.25299	0.283	0.143	0.000670746
Flot1	5.25909e-08	0.728542	0.569	0.406	0.000713291
Arhgap30	5.51213e-08	0.390958	0.905	0.855	0.00074761
Patz1	5.56803e-08	0.724471	0.512	0.33	0.000755192
Uba7	5.58838e-08	1.02573	0.303	0.154	0.000757952
Chst15	5.69169e-08	1.39049	0.197	0.076	0.000771965
Zfp266	5.93317e-08	0.718462	0.503	0.335	0.000804717
Arhgef1	6.25001e-08	0.338447	0.96	0.967	0.000847689
Ctsl	6.26451e-08	0.655505	0.595	0.411	0.000849656
Mob3a	6.59297e-08	0.589231	0.627	0.473	0.000894205
Lman2l	6.59518e-08	0.927216	0.384	0.223	0.000894504
Rac2	7.10287e-08	0.200711	1	1	0.000963363
Slc9a3r1	7.70559e-08	0.310289	0.988	0.962	0.00104511
Sema4d	7.70992e-08	0.543483	0.699	0.537	0.0010457
Marcksl1	7.81053e-08	0.335937	0.988	0.945	0.00105934
Rcsd1	7.81086e-08	0.460061	0.867	0.807	0.00105939
Ctbp1	8.1893e-08	0.488966	0.818	0.675	0.00111071
Gid8	8.20977e-08	0.681909	0.566	0.396	0.00111349
Mxd4	8.33171e-08	0.566698	0.74	0.608	0.00113003
Trim11	8.4758e-08	0.950024	0.312	0.161	0.00114957
Il16	8.94679e-08	0.529961	0.751	0.622	0.00121345
Tmem229b	1.02581e-07	0.736665	0.448	0.269	0.00139131
Cat	1.04966e-07	0.560588	0.665	0.494	0.00142365
Tlr12	1.13211e-07	1.32034	0.211	0.088	0.00153549
Dtx3	1.1339e-07	0.767286	0.488	0.321	0.00153791
Prkcb	1.19934e-07	0.742791	0.52	0.359	0.00162666
Hmgb1	1.19944e-07	0.296711	1	1	0.0016268
Pgs1	1.21253e-07	0.665112	0.642	0.491	0.00164456
Mgat1	1.22566e-07	0.803333	0.419	0.254	0.00166236
Lmbr1l	1.29166e-07	0.842327	0.384	0.225	0.00175187
Card9	1.31188e-07	1.2177	0.199	0.079	0.00177931
Ei24	1.3175e-07	0.986717	0.355	0.206	0.00178692
Kdm5a	1.36356e-07	0.59649	0.624	0.453	0.00184939
Wnt8b	1.39522e-07	1.08383	0.28	0.14	0.00189234
Bbc3	1.39848e-07	1.39487	0.165	0.057	0.00189676
Atxn10	1.43804e-07	0.35156	0.893	0.834	0.00195042
Hes6	1.44605e-07	0.493303	0.717	0.58	0.00196128
Wdr78	1.5041e-07	1.25736	0.202	0.083	0.00204002
Cass4	1.55537e-07	1.85827	0.124	0.035	0.00210954
D16Ertd472e	1.5947e-07	0.636966	0.63	0.492	0.00216289
Rps24	1.67701e-07	0.0917114	1	1	0.00227453
Trpv2	1.6799e-07	0.536887	0.685	0.551	0.00227845
Usp7	1.68918e-07	0.638564	0.532	0.366	0.00229103
Zbtb8b	1.77763e-07	1.12049	0.327	0.181	0.00241099
Nkd1	1.80814e-07	1.43186	0.171	0.062	0.00245238
Rbm7	1.82501e-07	0.575521	0.613	0.466	0.00247527
Stat4	1.83022e-07	0.77059	0.457	0.288	0.00248233
Gm43352	2.06739e-07	1.21164	0.269	0.133	0.002804
Rwdd2a	2.17288e-07	1.54535	0.173	0.066	0.00294708
Rbpms2	2.19284e-07	1.58104	0.136	0.041	0.00297414
Tmc8	2.31156e-07	0.764405	0.471	0.307	0.00313517
Stk4	2.35723e-07	0.591613	0.682	0.53	0.00319711
Txnip	2.43385e-07	0.59506	0.645	0.494	0.00330103
Cnn3	2.47712e-07	1.41702	0.251	0.124	0.00335971
Aff1	2.53124e-07	1.11535	0.292	0.154	0.00343312
Sh2d2a	2.56207e-07	0.415525	0.899	0.826	0.00347493
Smim14	2.60296e-07	0.681608	0.491	0.325	0.00353039
Ypel5	2.63111e-07	0.723251	0.41	0.25	0.00356857
Fam102a	2.66493e-07	0.776512	0.488	0.339	0.00361445
2610035D17Rik	2.70112e-07	1.48563	0.171	0.064	0.00366352
Galnt12	2.71079e-07	0.50384	0.717	0.613	0.00367665
Pacsin1	2.76723e-07	0.919669	0.364	0.214	0.0037532
Vav1	2.83879e-07	0.535817	0.682	0.575	0.00385025
Evi5l	2.86101e-07	1.66262	0.156	0.055	0.00388039
Itm2b	2.92426e-07	0.219428	1	1	0.00396618
Ccnd3	2.95203e-07	0.464004	0.861	0.829	0.00400384
Rnaset2b	3.12395e-07	1.40719	0.185	0.074	0.00423702
Zfp553	3.18947e-07	0.913903	0.321	0.178	0.00432588
Palm	3.20248e-07	0.860029	0.382	0.23	0.00434353
Wdr33	3.36228e-07	0.38704	0.87	0.819	0.00456026
Prkcq	3.57538e-07	0.49106	0.723	0.558	0.00484929
Gsn	3.64986e-07	0.840972	0.431	0.28	0.0049503

## Sheet: HEBcKO Down > 0.25
	p_val	avg_log2FC	pct.1	pct.2	p_val_adj
Gpr162	1.83617e-23	4.60077	0.188	0.009	2.4904e-19
Parm1	1.08269e-24	4.10034	0.202	0.01	1.46846e-20
Il17a	3.16618e-16	3.48869	0.263	0.076	4.29429e-12
Sdc4	2.36476e-53	3.42462	0.514	0.076	3.20733e-49
Gm525	2.45383e-09	3.24529	0.15	0.041	3.32813e-05
Dhrs3	1.31082e-13	3.10269	0.15	0.022	1.77786e-09
Esrp1	3.93114e-11	3.06472	0.127	0.021	5.33181e-07
Ampd1	7.74111e-34	3.01288	0.376	0.064	1.04993e-29
D430041D05Rik	4.11141e-19	2.87055	0.225	0.038	5.5763e-15
Mzb1	2.73805e-65	2.86678	0.734	0.214	3.71361e-61
Fxyd7	1.55704e-11	2.72142	0.142	0.026	2.11181e-07
Id3	2.48201e-60	2.58043	0.702	0.157	3.36635e-56
Dzip1	4.02067e-09	2.41022	0.118	0.024	5.45323e-05
Gfra1	2.02166e-16	2.34686	0.251	0.064	2.74198e-12
Epcam	1.85114e-39	2.32061	0.535	0.143	2.5107e-35
Ppp1r3b	3.15591e-09	2.28532	0.136	0.033	4.28037e-05
Bmp7	3.51005e-10	2.28336	0.147	0.035	4.76068e-06
Gm13855	8.45885e-09	2.27622	0.113	0.022	0.000114727
Nav1	9.19194e-10	2.27331	0.124	0.024	1.2467e-05
Gm13652	3.03939e-23	2.20674	0.376	0.107	4.12233e-19
Ppm1e	2.24311e-14	2.20674	0.185	0.035	3.04233e-10
Syt13	4.46995e-19	2.1749	0.312	0.088	6.06259e-15
Arvcf	7.10417e-12	2.16906	0.185	0.047	9.63539e-08
Atp1b1	4.10743e-26	2.13872	0.419	0.123	5.57091e-22
Cxcr5	1.07475e-22	2.10536	0.379	0.112	1.45768e-18
Colq	3.96609e-17	2.0849	0.312	0.098	5.37921e-13
Aqp11	2.73712e-33	2.06472	0.642	0.29	3.71236e-29
Pde6a	7.45518e-15	2.02819	0.263	0.078	1.01115e-10
Syk	1.35516e-12	2.0146	0.202	0.052	1.838e-08
1700048O20Rik	1.48932e-11	1.97801	0.217	0.067	2.01996e-07
Tmem151b	3.93118e-09	1.93781	0.176	0.057	5.33186e-05
Arhgap26	9.84595e-12	1.93544	0.188	0.048	1.33541e-07
Endou	7.78553e-63	1.93528	0.873	0.466	1.05595e-58
Slc25a41	1.70897e-09	1.92499	0.13	0.028	2.31788e-05
Art1	2.64301e-22	1.9215	0.379	0.111	3.58472e-18
Pdlim4	2.12063e-44	1.87786	0.72	0.301	2.87622e-40
Trdv5	1.37212e-21	1.86416	0.384	0.117	1.86101e-17
Gm48321	1.90071e-10	1.86144	0.173	0.047	2.57793e-06
Cass4	1.55537e-07	1.85827	0.124	0.035	0.00210954
Fbln2	9.95511e-15	1.83516	0.338	0.131	1.35021e-10
Wfs1	7.58699e-11	1.83025	0.191	0.055	1.02902e-06
Notch3	1.29646e-18	1.80692	0.332	0.098	1.7584e-14
Gm10093	1.02893e-08	1.80692	0.162	0.05	0.000139553
Klc3	7.75609e-19	1.77316	0.361	0.119	1.05196e-14
Ighm	2.31026e-55	1.76788	0.873	0.43	3.1334e-51
Hsdl1	1.92881e-16	1.76071	0.327	0.109	2.61605e-12
Unc5cl	3.35825e-09	1.75687	0.191	0.066	4.5548e-05
Plcl1	6.73494e-13	1.75402	0.257	0.085	9.1346e-09
Tcrg-V4	4.75163e-30	1.74498	0.613	0.24	6.44464e-26
Fam210b	1.60662e-12	1.74279	0.237	0.073	2.17906e-08
Arpp21	5.77626e-20	1.73176	0.457	0.183	7.83435e-16
Il21r	2.22568e-44	1.69699	0.775	0.358	3.01869e-40
Gm37552	1.41392e-17	1.67209	0.384	0.145	1.9177e-13
Nlrx1	5.14771e-12	1.66828	0.327	0.147	6.98184e-08
Cd5	3.43904e-20	1.66418	0.419	0.154	4.66437e-16
Evi5l	2.86101e-07	1.66262	0.156	0.055	0.00388039
Ilvbl	1.79558e-46	1.64514	0.85	0.504	2.43535e-42
Etv5	6.60466e-29	1.63617	0.633	0.288	8.95791e-25
Man1a	6.45628e-22	1.6299	0.514	0.223	8.75665e-18
Eif2ak3	1.13697e-10	1.60339	0.266	0.105	1.54207e-06
Rbpms2	2.19284e-07	1.58104	0.136	0.041	0.00297414
St8sia1	4.11067e-16	1.57118	0.358	0.133	5.5753e-12
St6gal1	4.52831e-39	1.56436	0.754	0.373	6.14175e-35
A930003A15Rik	8.69847e-10	1.55493	0.246	0.098	1.17977e-05
Rwdd2a	2.17288e-07	1.54535	0.173	0.066	0.00294708
St3gal6	2.37092e-11	1.54083	0.318	0.142	3.21569e-07
Dclre1c	7.10879e-14	1.5204	0.341	0.135	9.64165e-10
Fam167a	2.51513e-14	1.51538	0.379	0.164	3.41127e-10
Tcf12	1.0302e-29	1.49292	0.694	0.366	1.39726e-25
2610035D17Rik	2.70112e-07	1.48563	0.171	0.064	0.00366352
Cxxc5	2.58184e-14	1.48309	0.425	0.211	3.50175e-10
Cdkn1c	7.77597e-11	1.47976	0.338	0.161	1.05465e-06
Neil1	3.56883e-11	1.45521	0.292	0.119	4.8404e-07
Dynlt1b	4.24793e-14	1.43613	0.399	0.185	5.76147e-10
Nim1k	4.27289e-11	1.43395	0.289	0.117	5.79532e-07
Nkd1	1.80814e-07	1.43186	0.171	0.062	0.00245238
Dgkeos	6.1943e-17	1.43047	0.483	0.23	8.40133e-13
Nfkbie	2.34642e-14	1.42285	0.408	0.185	3.18245e-10
Cnn3	2.47712e-07	1.41702	0.251	0.124	0.00335971
Ppp1r13b	1.89077e-08	1.40792	0.24	0.104	0.000256445
Rnaset2b	3.12395e-07	1.40719	0.185	0.074	0.00423702
Bbc3	1.39848e-07	1.39487	0.165	0.057	0.00189676
Chst15	5.69169e-08	1.39049	0.197	0.076	0.000771965
Gem	3.12656e-09	1.37684	0.22	0.083	4.24056e-05
Tbxa2r	5.30935e-20	1.37249	0.566	0.282	7.20107e-16
Il17rb	1.67633e-13	1.36649	0.318	0.117	2.27361e-09
Rtkn	3.52298e-09	1.35577	0.231	0.09	4.77822e-05
Hist3h2ba	4.81379e-13	1.32982	0.471	0.245	6.52894e-09
Tlr12	1.13211e-07	1.32034	0.211	0.088	0.00153549
Tm6sf1	5.29601e-13	1.3147	0.393	0.187	7.18298e-09
Igsf23	3.66307e-09	1.3134	0.272	0.119	4.96822e-05
Gpr25	2.60892e-31	1.29455	0.792	0.465	3.53848e-27
Slc35d1	1.5004e-08	1.28974	0.338	0.185	0.000203499
Rapgef3	4.62197e-08	1.28336	0.237	0.104	0.000626878
B630019A10Rik	7.58059e-11	1.27622	0.358	0.178	1.02816e-06
Sox13	5.39246e-42	1.27503	0.908	0.646	7.3138e-38
Slc11a2	6.48504e-21	1.27259	0.627	0.339	8.79566e-17
Rgs10	4.89704e-40	1.27216	0.919	0.667	6.64185e-36
Prrt1	2.77713e-31	1.27072	0.795	0.497	3.76662e-27
Iqch	1.97282e-24	1.26809	0.725	0.437	2.67573e-20
Cd6	1.79936e-18	1.26734	0.598	0.337	2.44047e-14
Wdr78	1.5041e-07	1.25736	0.202	0.083	0.00204002
Bach1	1.65655e-13	1.25669	0.46	0.24	2.24678e-09
Myl10	5.18636e-12	1.2565	0.491	0.287	7.03426e-08
Cxcr4	4.94541e-08	1.25299	0.283	0.143	0.000670746
Eng	2.0488e-13	1.25118	0.436	0.219	2.77878e-09
Capn3	1.54577e-18	1.25094	0.633	0.375	2.09653e-14
Csrnp1	3.85686e-14	1.23696	0.506	0.283	5.23105e-10
Xlr4c	1.10055e-10	1.23089	0.367	0.185	1.49268e-06
Ptrh1	8.79482e-10	1.22639	0.318	0.149	1.19284e-05
Podnl1	5.46276e-20	1.22584	0.633	0.359	7.40914e-16
Card9	1.31188e-07	1.2177	0.199	0.079	0.00177931
Slc35b4	8.82705e-17	1.21523	0.546	0.299	1.19721e-12
Zfp219	1.14995e-14	1.215	0.509	0.276	1.55967e-10
Atg7	1.52322e-08	1.21228	0.298	0.147	0.000206594
Gm43352	2.06739e-07	1.21164	0.269	0.133	0.002804
Glcci1	4.94063e-09	1.19824	0.347	0.181	6.70097e-05
Abcb9	8.18752e-23	1.19518	0.688	0.39	1.11047e-18
Tmem121	7.32116e-17	1.18689	0.538	0.287	9.9297e-13
Ptprf	2.24052e-11	1.17889	0.408	0.211	3.03881e-07
Nrros	2.80781e-28	1.17584	0.803	0.515	3.80824e-24
Phf10	3.26419e-12	1.15783	0.402	0.193	4.42722e-08
Eif2s3y	1.60235e-13	1.14702	0.454	0.23	2.17327e-09
Ptpre	3.75075e-10	1.14226	0.393	0.207	5.08714e-06
Nck2	2.2485e-08	1.13809	0.376	0.219	0.000304964
Lig4	5.7635e-11	1.1213	0.393	0.195	7.81703e-07
Zbtb8b	1.77763e-07	1.12049	0.327	0.181	0.00241099
Aff1	2.53124e-07	1.11535	0.292	0.154	0.00343312
Plxdc2	3.55957e-08	1.10643	0.338	0.185	0.000482785
Kdm4b	3.08978e-08	1.10319	0.332	0.178	0.000419067
Herc3	3.98346e-08	1.10084	0.344	0.192	0.000540277
Wnt8b	1.39522e-07	1.08383	0.28	0.14	0.00189234
Pdcd1	1.08617e-26	1.08192	0.855	0.511	1.47317e-22
Bcl2	2.98813e-16	1.08168	0.613	0.351	4.05281e-12
Tmem108	8.16729e-10	1.06036	0.399	0.216	1.10773e-05
Heg1	5.49447e-19	1.05755	0.699	0.472	7.45215e-15
Ube2v1	4.15694e-11	1.0503	0.422	0.221	5.63806e-07
Tnfsf11	4.28796e-11	1.04896	0.506	0.311	5.81576e-07
Yeats2	9.5746e-09	1.04235	0.373	0.206	0.00012986
Ptger4	4.24631e-10	1.03999	0.37	0.185	5.75927e-06
Plekhf1	2.41579e-17	1.03884	0.642	0.375	3.27654e-13
Trp53i11	9.04276e-15	1.03599	0.647	0.428	1.22647e-10
Inpp5b	4.41514e-13	1.03072	0.512	0.29	5.98825e-09
Klf3	5.27818e-15	1.02972	0.653	0.439	7.15879e-11
Kcna3	2.01038e-13	1.02851	0.572	0.366	2.72667e-09
Tecpr1	2.20317e-15	1.02724	0.659	0.446	2.98815e-11
Uba7	5.58838e-08	1.02573	0.303	0.154	0.000757952
Plxnd1	6.17339e-13	1.0206	0.517	0.295	8.37297e-09
Ubc	1.75697e-28	1.01954	0.864	0.589	2.38297e-24
Chmp1b	3.51926e-15	1.01826	0.627	0.404	4.77317e-11
Ergic1	1.57558e-21	1.01794	0.754	0.485	2.13696e-17
Stx6	1.16584e-16	1.01309	0.601	0.337	1.58122e-12
Xlr4b	1.69041e-17	1.01258	0.676	0.439	2.29271e-13
Sh3bp5	5.05451e-11	1.00892	0.54	0.349	6.85543e-07
Ramp1	4.95385e-41	1.00868	0.98	0.798	6.7189e-37
Abi3	3.85821e-38	0.994793	0.954	0.77	5.23288e-34
Ei24	1.3175e-07	0.986717	0.355	0.206	0.00178692
Serinc3	1.81717e-14	0.983054	0.621	0.402	2.46463e-10
Ano6	1.97759e-18	0.978345	0.72	0.466	2.68221e-14
5730559C18Rik	6.36491e-09	0.977655	0.367	0.195	8.63272e-05
C030034L19Rik	1.99663e-08	0.977257	0.413	0.25	0.000270803
Dck	2.65131e-21	0.976201	0.769	0.53	3.59597e-17
Smox	1.38441e-24	0.974899	0.85	0.62	1.87767e-20
Cd8a	1.15122e-08	0.974201	0.5	0.339	0.00015614
Arhgef3	1.05475e-09	0.966262	0.413	0.219	1.43056e-05
Man2a2	2.45167e-08	0.96356	0.315	0.155	0.000332519
Gng10	5.88712e-12	0.955095	0.561	0.358	7.98471e-08
Dgkd	1.49426e-10	0.954295	0.483	0.285	2.02666e-06
Trim11	8.4758e-08	0.950024	0.312	0.161	0.00114957
Prkd2	5.21699e-14	0.949242	0.621	0.385	7.0758e-10
Trgv2	3.75109e-19	0.947398	0.873	0.667	5.0876e-15
Sipa1	4.54852e-14	0.943743	0.61	0.389	6.16916e-10
Armc7	3.19353e-11	0.933614	0.546	0.339	4.33139e-07
H1f0	1.55447e-10	0.931423	0.688	0.515	2.10833e-06
Pdcd4	2.01895e-13	0.930781	0.607	0.37	2.7383e-09
Dennd2d	2.2086e-08	0.93025	0.419	0.247	0.000299553
Arid5a	6.50986e-11	0.928565	0.564	0.375	8.82933e-07
Lman2l	6.59518e-08	0.927216	0.384	0.223	0.000894504
Sirt2	7.29424e-11	0.925844	0.656	0.499	9.89318e-07
Mynn	2.41584e-09	0.919948	0.422	0.237	3.2766e-05
Pacsin1	2.76723e-07	0.919669	0.364	0.214	0.0037532
Rpl13a	6.86853e-60	0.915979	1	0.974	9.31578e-56
Zfp553	3.18947e-07	0.913903	0.321	0.178	0.00432588
Zfp36	2.74235e-09	0.912716	0.59	0.401	3.71945e-05
Rorc	5.75851e-28	0.908302	0.931	0.782	7.81027e-24
Fdx1	2.26302e-10	0.907247	0.546	0.356	3.06934e-06
Mef2a	1.09763e-08	0.905521	0.488	0.314	0.000148871
Coro2b	6.22461e-13	0.905344	0.584	0.354	8.44244e-09
Zfp36l2	2.51913e-11	0.902311	0.572	0.354	3.4167e-07
Vezf1	1.24318e-08	0.898911	0.428	0.25	0.000168612
Elovl5	9.25506e-13	0.897301	0.624	0.427	1.25526e-08
Btg1	1.34285e-15	0.895562	0.772	0.572	1.82131e-11
Brf1	9.04303e-12	0.893034	0.581	0.378	1.22651e-07
Bpgm	1.27316e-08	0.892538	0.41	0.237	0.000172678
Cbx4	4.67135e-09	0.883804	0.448	0.264	6.33575e-05
Ikzf1	1.91247e-16	0.87186	0.734	0.494	2.59388e-12
Rab27a	1.83981e-13	0.871459	0.682	0.489	2.49534e-09
Sytl1	5.96948e-12	0.868871	0.624	0.416	8.09641e-08
Tspan13	2.67727e-24	0.867909	0.887	0.651	3.63118e-20
Dennd1c	1.31286e-08	0.865648	0.451	0.273	0.000178063
Palm	3.20248e-07	0.860029	0.382	0.23	0.00434353
Gpr132	9.87879e-10	0.8599	0.488	0.297	1.33986e-05
Msi2	3.31729e-08	0.859831	0.431	0.257	0.000449924
1700012B07Rik	9.55186e-14	0.859774	0.711	0.492	1.29552e-09
Lax1	7.7085e-13	0.859277	0.645	0.439	1.0455e-08
Dusp2	1.54453e-08	0.856477	0.682	0.57	0.000209484
Tnfrsf1a	2.18812e-09	0.853312	0.532	0.347	2.96774e-05
Zfp36l1	2.93831e-11	0.847347	0.682	0.515	3.98523e-07
P2rx7	9.88246e-10	0.843536	0.529	0.344	1.34036e-05
Lmbr1l	1.29166e-07	0.842327	0.384	0.225	0.00175187
Gsn	3.64986e-07	0.840972	0.431	0.28	0.0049503
Gm11808	7.34362e-13	0.837375	0.653	0.446	9.96015e-09
Cblb	1.94828e-08	0.833802	0.413	0.235	0.000264245
Xlr4a	1.26758e-12	0.8311	0.694	0.522	1.71922e-08
Midn	2.38359e-14	0.824523	0.717	0.525	3.23286e-10
Sla	9.34424e-24	0.82262	0.931	0.807	1.26736e-19
Agfg2	1.224e-12	0.822435	0.616	0.385	1.66011e-08
Gata3	1.08796e-23	0.818223	0.942	0.798	1.47561e-19
Mpp1	2.12493e-10	0.815122	0.587	0.392	2.88205e-06
Mbp	6.08225e-10	0.8116	0.572	0.385	8.24936e-06
Prps2	5.55409e-13	0.811575	0.668	0.449	7.53301e-09
Zyx	3.64581e-14	0.810003	0.746	0.551	4.94481e-10
Rabgap1l	5.63875e-15	0.809134	0.751	0.566	7.64784e-11
Lipa	2.90103e-14	0.807269	0.754	0.56	3.93466e-10
Ptk2b	3.63311e-08	0.805076	0.52	0.359	0.000492758
Mgat1	1.22566e-07	0.803333	0.419	0.254	0.00166236
Ppp1r9b	4.14123e-08	0.800797	0.393	0.219	0.000561675
Ppt2	1.14559e-13	0.796786	0.668	0.434	1.55376e-09
Arhgap4	6.83522e-13	0.791784	0.697	0.522	9.27061e-09
Irf2bpl	3.47278e-10	0.784713	0.616	0.42	4.71013e-06
Rbmx	2.32876e-10	0.778541	0.665	0.497	3.1585e-06
Fam102a	2.66493e-07	0.776512	0.488	0.339	0.00361445
Myb	1.72999e-17	0.7764	0.864	0.693	2.34639e-13
Jakmip1	1.22426e-14	0.77537	0.746	0.522	1.66047e-10
Blk	2.47685e-35	0.774915	0.983	0.872	3.35935e-31
Rasal3	6.50465e-21	0.774023	0.905	0.762	8.82225e-17
Stat4	1.83022e-07	0.77059	0.457	0.288	0.00248233
Klhl6	4.65252e-11	0.770077	0.621	0.42	6.31022e-07
Ccr9	3.65364e-32	0.769617	0.997	0.978	4.95544e-28
Baz2a	8.50226e-10	0.769615	0.578	0.371	1.15316e-05
Dtx3	1.1339e-07	0.767286	0.488	0.321	0.00153791
Tmc8	2.31156e-07	0.764405	0.471	0.307	0.00313517
Ypel3	8.57853e-25	0.764013	0.971	0.886	1.16351e-20
Usp3	2.93741e-10	0.763904	0.595	0.406	3.984e-06
Sesn3	6.5214e-09	0.761347	0.5	0.311	8.84497e-05
Kbtbd11	3.8817e-17	0.761054	0.806	0.596	5.26475e-13
Sun2	4.81796e-08	0.758221	0.535	0.37	0.000653459
Pstpip1	4.86839e-16	0.756827	0.812	0.62	6.60299e-12
Narf	4.74014e-08	0.751155	0.526	0.354	0.000642905
Fyco1	4.18702e-08	0.750965	0.361	0.192	0.000567885
Prkcb	1.19934e-07	0.742791	0.52	0.359	0.00162666
Sox4	4.28502e-16	0.741929	0.928	0.781	5.81178e-12
Runx3	8.40849e-09	0.737398	0.639	0.48	0.000114044
Tmem229b	1.02581e-07	0.736665	0.448	0.269	0.00139131
Map4k2	2.37318e-11	0.733931	0.673	0.48	3.21875e-07
Flot1	5.25909e-08	0.728542	0.569	0.406	0.000713291
Aagab	4.83471e-11	0.726908	0.679	0.491	6.55732e-07
Dap	5.96947e-09	0.724757	0.52	0.339	8.09639e-05
Patz1	5.56803e-08	0.724471	0.512	0.33	0.000755192
Lef1	4.55976e-13	0.72379	0.861	0.737	6.18441e-09
Ypel5	2.63111e-07	0.723251	0.41	0.25	0.00356857
Lrrc42	1.67657e-09	0.721653	0.52	0.314	2.27393e-05
Zfp266	5.93317e-08	0.718462	0.503	0.335	0.000804717
Hdac7	8.56259e-18	0.718208	0.882	0.71	1.16134e-13
1110008P14Rik	5.62238e-14	0.718008	0.789	0.591	7.62564e-10
Kcnn4	9.62349e-09	0.715245	0.592	0.432	0.000130523
Sla2	1.1821e-16	0.708459	0.855	0.649	1.60328e-12
Tgfbr2	2.80564e-10	0.706449	0.717	0.544	3.80529e-06
Cd164	1.09202e-15	0.695838	0.905	0.732	1.48111e-11
Tcrg-C2	4.99124e-10	0.695743	0.575	0.354	6.76962e-06
Tsc22d4	1.01821e-34	0.69492	0.994	0.974	1.381e-30
Cnot2	1.04414e-08	0.688344	0.639	0.485	0.000141617
Git2	1.50499e-10	0.687777	0.711	0.532	2.04121e-06
Wdr6	2.02158e-08	0.686355	0.587	0.416	0.000274187
Arhgef2	7.37376e-09	0.684179	0.59	0.404	0.00010001
Gid8	8.20977e-08	0.681909	0.566	0.396	0.00111349
Smim14	2.60296e-07	0.681608	0.491	0.325	0.00353039
Btg2	3.23661e-08	0.681311	0.714	0.589	0.000438981
Mcl1	3.54504e-08	0.68025	0.543	0.359	0.000480813
Carmil2	4.5649e-09	0.676482	0.656	0.491	6.19137e-05
Dnm2	6.24129e-12	0.666212	0.74	0.549	8.46506e-08
Pgs1	1.21253e-07	0.665112	0.642	0.491	0.00164456
Smarcd2	4.3056e-11	0.665052	0.708	0.547	5.83969e-07
Ptpn7	1.02845e-17	0.660698	0.948	0.888	1.39489e-13
Fcho1	5.895e-09	0.660614	0.668	0.52	7.99539e-05
Nav2	1.0298e-10	0.657459	0.702	0.516	1.39672e-06
Itk	1.20824e-12	0.657379	0.812	0.636	1.63873e-08
Ctsl	6.26451e-08	0.655505	0.595	0.411	0.000849656
Zap70	1.2966e-18	0.650398	0.965	0.921	1.75857e-14
Pnrc1	1.48827e-13	0.649682	0.945	0.843	2.01853e-09
Lamp1	3.6362e-16	0.646695	0.87	0.691	4.93178e-12
Pglyrp2	1.35499e-09	0.646663	0.676	0.503	1.83777e-05
Dnajb1	3.2246e-09	0.645996	0.685	0.556	4.37352e-05
Rnf114	1.09407e-11	0.640032	0.777	0.618	1.48389e-07
Usp7	1.68918e-07	0.638564	0.532	0.366	0.00229103
D16Ertd472e	1.5947e-07	0.636966	0.63	0.492	0.00216289
Nebl	6.90748e-19	0.636889	0.948	0.782	9.36861e-15
Foxn3	8.1387e-10	0.636858	0.694	0.487	1.10385e-05
Kdm5b	2.2941e-08	0.636227	0.662	0.509	0.000311149
Impdh1	9.34458e-10	0.635457	0.691	0.518	1.26741e-05
Itgb2	5.34985e-10	0.62929	0.714	0.522	7.25601e-06
Rnf166	1.64158e-11	0.620156	0.751	0.57	2.22647e-07
Satb1	1.00376e-10	0.617888	0.829	0.693	1.36141e-06
Spint2	1.77586e-12	0.614591	0.858	0.791	2.4086e-08
Tox	3.10494e-11	0.614232	0.815	0.618	4.21123e-07
Mtf2	1.01122e-08	0.613823	0.659	0.485	0.000137152
Ifngr1	6.28117e-32	0.613787	1	0.99	8.51915e-28
Tomm34	4.81432e-08	0.610597	0.613	0.43	0.000652966
Erh	8.81073e-10	0.610246	0.717	0.547	1.195e-05
Desi1	3.17339e-08	0.609753	0.708	0.544	0.000430407
H13	2.22662e-13	0.609113	0.873	0.767	3.01997e-09
Hmga1	2.34984e-23	0.604541	0.983	0.952	3.18709e-19
Rasgrp1	3.39425e-18	0.603004	0.98	0.886	4.60362e-14
Kdm5a	1.36356e-07	0.59649	0.624	0.453	0.00184939
Txnip	2.43385e-07	0.59506	0.645	0.494	0.00330103
Elf1	2.57874e-14	0.592621	0.922	0.841	3.49755e-10
Cirbp	2.34225e-12	0.592549	0.827	0.665	3.17679e-08
Stk4	2.35723e-07	0.591613	0.682	0.53	0.00319711
Gtf2h4	1.30967e-09	0.589951	0.746	0.587	1.7763e-05
Mob3a	6.59297e-08	0.589231	0.627	0.473	0.000894205
Cd81	1.64848e-10	0.585943	0.812	0.648	2.23584e-06
Tia1	2.17294e-10	0.57953	0.775	0.589	2.94716e-06
Cyb5a	2.88372e-17	0.57938	0.977	0.934	3.91119e-13
Sh3kbp1	7.06472e-11	0.575991	0.893	0.72	9.58188e-07
Rbm7	1.82501e-07	0.575521	0.613	0.466	0.00247527
Mkrn1	3.70134e-08	0.567958	0.665	0.508	0.000502013
Mxd4	8.33171e-08	0.566698	0.74	0.608	0.00113003
Nrip1	2.4964e-11	0.56493	0.824	0.658	3.38586e-07
Ckb	6.11175e-13	0.562748	0.977	0.952	8.28937e-09
Cat	1.04966e-07	0.560588	0.665	0.494	0.00142365
Traf4	1.70289e-08	0.555817	0.754	0.63	0.000230963
Ablim1	1.95594e-10	0.555295	0.829	0.658	2.65284e-06
Cd27	4.25784e-11	0.554269	0.879	0.767	5.7749e-07
Uba52	3.2283e-41	0.550586	1	1	4.37854e-37
Ctnnb1	3.5476e-08	0.549051	0.694	0.528	0.00048116
Psap	8.23287e-16	0.54788	0.974	0.896	1.11662e-11
Cd247	1.33559e-16	0.546918	0.991	0.971	1.81146e-12
Sema4d	7.70992e-08	0.543483	0.699	0.537	0.0010457
Mettl9	3.17643e-08	0.543306	0.691	0.527	0.000430819
Nfkbia	2.18658e-09	0.538025	0.546	0.361	2.96566e-05
Ppp1r14b	2.11029e-13	0.537435	0.968	0.922	2.86219e-09
Trpv2	1.6799e-07	0.536887	0.685	0.551	0.00227845
Vav1	2.83879e-07	0.535817	0.682	0.575	0.00385025
Il16	8.94679e-08	0.529961	0.751	0.622	0.00121345
Camk2d	1.66874e-15	0.520399	0.991	0.934	2.26331e-11
Lcp2	8.26261e-09	0.51602	0.824	0.68	0.000112066
Ppp1cc	1.57447e-20	0.515649	0.988	0.986	2.13545e-16
Gapdh	1.55855e-31	0.512053	1	1	2.11386e-27
Arhgap45	4.86807e-14	0.510653	0.974	0.927	6.60256e-10
Znrf1	5.44608e-12	0.505127	0.96	0.874	7.38651e-08
Galnt12	2.71079e-07	0.50384	0.717	0.613	0.00367665
Bcl11b	1.65558e-12	0.503556	0.96	0.867	2.24546e-08
Rsrp1	8.83819e-16	0.503555	0.986	0.969	1.19872e-11
Arhgap9	6.45139e-10	0.502577	0.864	0.722	8.75003e-06
Rps7	6.85546e-73	0.499054	1	1	9.29806e-69
Hes6	1.44605e-07	0.493303	0.717	0.58	0.00196128
Prkcq	3.57538e-07	0.49106	0.723	0.558	0.00484929
Ctbp1	8.1893e-08	0.488966	0.818	0.675	0.00111071
Ctsb	3.16362e-08	0.488317	0.792	0.649	0.000429082
Malat1	3.04947e-12	0.48282	1	0.998	4.13599e-08
Lat	2.6791e-25	0.480048	1	1	3.63367e-21
Tbc1d10c	2.84569e-12	0.47455	0.962	0.927	3.85962e-08
Igfbp4	5.04732e-12	0.472473	0.59	0.295	6.84568e-08
Slc38a1	5.84442e-09	0.470817	0.858	0.769	7.92679e-05
Ets1	1.37462e-14	0.468044	0.971	0.933	1.8644e-10
Ccnd3	2.95203e-07	0.464004	0.861	0.829	0.00400384
Rcsd1	7.81086e-08	0.460061	0.867	0.807	0.00105939
Def6	1.52604e-11	0.456923	0.951	0.877	2.06977e-07
Tmem59	8.64362e-10	0.451757	0.884	0.767	1.17233e-05
Fkbp1a	1.93146e-13	0.43665	0.977	0.972	2.61964e-09
Cd3d	5.59727e-23	0.432399	1	0.998	7.59158e-19
Arl6ip1	2.53105e-13	0.424529	0.994	0.998	3.43287e-09
Abhd8	4.22051e-09	0.418214	0.928	0.883	5.72427e-05
Ubald2	2.58892e-08	0.416095	0.922	0.82	0.000351135
Sh2d2a	2.56207e-07	0.415525	0.899	0.826	0.00347493
Cd47	1.05697e-11	0.41005	0.994	0.969	1.43357e-07
Eef2	4.35131e-31	0.409956	1	1	5.90168e-27
Pcbp2	1.66409e-18	0.40194	1	0.997	2.25701e-14
Arhgap30	5.51213e-08	0.390958	0.905	0.855	0.00074761
Chchd2	1.01576e-19	0.388471	1	0.998	1.37767e-15
Gm9493	2.83759e-11	0.388331	0.98	0.94	3.84863e-07
Cd3g	2.48772e-11	0.387956	0.997	0.988	3.3741e-07
Cux1	1.3783e-08	0.387563	0.899	0.801	0.000186939
Wdr33	3.36228e-07	0.38704	0.87	0.819	0.00456026
Sept9	7.57235e-09	0.384472	0.954	0.912	0.000102704
Grcc10	2.64545e-08	0.370732	0.968	0.927	0.000358803
Ucp2	2.33932e-20	0.370318	1	1	3.17282e-16
Eif4b	3.94006e-08	0.369731	0.948	0.87	0.000534391
Atxn10	1.43804e-07	0.35156	0.893	0.834	0.00195042
Hnrnpl	7.94309e-10	0.341325	0.991	0.981	1.07732e-05
Arhgef1	6.25001e-08	0.338447	0.96	0.967	0.000847689
Marcksl1	7.81053e-08	0.335937	0.988	0.945	0.00105934
Slc9a3r1	7.70559e-08	0.310289	0.988	0.962	0.00104511
Prkar1a	2.45024e-09	0.307854	1	0.99	3.32326e-05
Ftl1	3.50976e-15	0.304537	1	1	4.76029e-11
Hmgb1	1.19944e-07	0.296711	1	1	0.0016268
Hspa8	1.2343e-12	0.290828	1	1	1.67408e-08
mt-Atp8	3.40193e-13	0.266814	1	1	4.61404e-09
Rpl29	4.81219e-22	0.257551	1	1	6.52677e-18
Eif3f	5.57267e-10	0.2555	1	1	7.55821e-06

## Sheet: Curated list
Cxcr5		Lipa
Syk		Etv5
Notch3		St6gal1
Il21r		Sox13
Cd5		Cxcr5
Etv5		Cd5
St6gal1		Cxcr4
Il17rb		Rorc
Sox13		Gata3
Cxcr4		Ccr9
Pdcd1		Sox4
Bcl2		Cd3g
Rorc		Syk
Ikzf1		Notch3
P2rx7		Il21r
Cblb		Il17rb
Gata3		Pdcd1
Lipa		Bcl2
Myb		Ikzf1
Blk		P2rx7
Stat4		Cblb
Ccr9		Myb
Sox4		Blk
Runx3		Stat4
Lef1		Runx3
Itk		Lef1
Zap70		Itk
Tox		Zap70
Ifngr1		Tox
Cd27		Ifngr1
Vav1		Cd27
Gapdh		Vav1
Bcl11b		Gapdh
Lat		Bcl11b
Igfbp4		Lat
Ets1		Igfbp4
Sh2d2a		Ets1
Cd3g		Sh2d2a
Gpr162
Parm1
Il17a
Sdc4
Gm525
Dhrs3
Esrp1
Ampd1
D430041D05Rik
Mzb1
Fxyd7
Id3
Dzip1
Gfra1
Epcam
Ppp1r3b
Bmp7
Gm13855
Nav1
Gm13652
Ppm1e
Syt13
Arvcf
Atp1b1
Colq
Aqp11
Pde6a
1700048O20Rik
Tmem151b
Arhgap26
Endou
Slc25a41
Art1
Pdlim4
Trdv5
Gm48321
Cass4
Fbln2
Wfs1
Gm10093
Klc3
Ighm
Hsdl1
Unc5cl
Plcl1
Tcrg-V4
Fam210b
Arpp21
Gm37552
Nlrx1
Evi5l
Ilvbl
Man1a
Eif2ak3
Rbpms2
St8sia1
A930003A15Rik
Rwdd2a
St3gal6
Dclre1c
Fam167a
Tcf12
2610035D17Rik
Cxxc5
Cdkn1c
Neil1
Dynlt1b
Nim1k
Nkd1
Dgkeos
Nfkbie
Cnn3
Ppp1r13b
Rnaset2b
Bbc3
Chst15
Gem
Tbxa2r
Rtkn
Hist3h2ba
Tlr12
Tm6sf1
Igsf23
Gpr25
Slc35d1
Rapgef3
B630019A10Rik
Slc11a2
Rgs10
Prrt1
Iqch
Cd6
Wdr78
Bach1
Myl10
Eng
Capn3
Csrnp1
Xlr4c
Ptrh1
Podnl1
Card9
Slc35b4
Zfp219
Atg7
Gm43352
Glcci1
Abcb9
Tmem121
Ptprf
Nrros
Phf10
Eif2s3y
Ptpre
Nck2
Lig4
Zbtb8b
Aff1
Plxdc2
Kdm4b
Herc3
Wnt8b
Tmem108
Heg1
Ube2v1
Tnfsf11
Yeats2
Ptger4
Plekhf1
Trp53i11
Inpp5b
Klf3
Kcna3
Tecpr1
Uba7
Plxnd1
Ubc
Chmp1b
Ergic1
Stx6
Xlr4b
Sh3bp5
Ramp1
Abi3
Ei24
Serinc3
Ano6
5730559C18Rik
C030034L19Rik
Dck
Smox
Cd8a
Arhgef3
Man2a2
Gng10
Dgkd
Trim11
Prkd2
Trgv2
Sipa1
Armc7
H1f0
Pdcd4
Dennd2d
Arid5a
Lman2l
Sirt2
Mynn
Pacsin1
Rpl13a
Zfp553
Zfp36
Fdx1
Mef2a
Coro2b
Zfp36l2
Vezf1
Elovl5
Btg1
Brf1
Bpgm
Cbx4
Rab27a
Sytl1
Tspan13
Dennd1c
Palm
Gpr132
Msi2
1700012B07Rik
Lax1
Dusp2
Tnfrsf1a
Zfp36l1
Lmbr1l
Gsn
Gm11808
Xlr4a
Midn
Sla
Agfg2
Mpp1
Mbp
Prps2
Zyx
Rabgap1l
Ptk2b
Mgat1
Ppp1r9b
Ppt2
Arhgap4
Irf2bpl
Rbmx
Fam102a
Jakmip1
Rasal3
Klhl6
Baz2a
Dtx3
Tmc8
Ypel3
Usp3
Sesn3
Kbtbd11
Sun2
Pstpip1
Narf
Fyco1
Prkcb
Tmem229b
Map4k2
Flot1
Aagab
Dap
Patz1
Ypel5
Lrrc42
Zfp266
Hdac7
1110008P14Rik
Kcnn4
Sla2
Tgfbr2
Cd164
Tcrg-C2
Tsc22d4
Cnot2
Git2
Wdr6
Arhgef2
Gid8
Smim14
Btg2
Mcl1
Carmil2
Dnm2
Pgs1
Smarcd2
Ptpn7
Fcho1
Nav2
Ctsl
Pnrc1
Lamp1
Pglyrp2
Dnajb1
Rnf114
Usp7
D16Ertd472e
Nebl
Foxn3
Kdm5b
Impdh1
Itgb2
Rnf166
Satb1
Spint2
Mtf2
Tomm34
Erh
Desi1
H13
Hmga1
Rasgrp1
Kdm5a
Txnip
Elf1
Cirbp
Stk4
Gtf2h4
Mob3a
Cd81
Tia1
Cyb5a
Sh3kbp1
Rbm7
Mkrn1
Mxd4
Nrip1
Ckb
Cat
Traf4
Ablim1
Uba52
Ctnnb1
Psap
Cd247
Sema4d
Mettl9
Nfkbia
Ppp1r14b
Trpv2
Il16
Camk2d
Lcp2
Ppp1cc
Arhgap45
Znrf1
Galnt12
Rsrp1
Arhgap9
Rps7
Hes6
Prkcq
Ctbp1
Ctsb
Malat1
Tbc1d10c
Slc38a1
Ccnd3
Rcsd1
Def6
Tmem59
Fkbp1a
Cd3d
Arl6ip1
Abhd8
Ubald2
Cd47
Eef2
Pcbp2
Arhgap30
Chchd2
Gm9493
Cux1
Wdr33
Sept9
Grcc10
Ucp2
Eif4b
Atxn10
Hnrnpl
Arhgef1
Marcksl1
Slc9a3r1
Prkar1a
Ftl1
Hmgb1
Hspa8
mt-Atp8
Rpl29
Eif3f

## Sheet: HEBcKO Up > -.25
	p_val	avg_log2FC	pct.1	pct.2	p_val_adj
Ly6a	7.08905e-15	-3.3161	0.023	0.204	9.61488e-11
Ms4a6b	3.85612e-25	-3.24072	0.04	0.335	5.23005e-21
Ms4a4b	9.28876e-28	-3.01876	0.061	0.394	1.25983e-23
Gimap4	4.28698e-17	-2.09615	0.124	0.377	5.81442e-13
Ccr2	2.9357e-35	-1.94171	0.251	0.653	3.98169e-31
Vim	2.1459e-38	-1.80824	0.624	0.855	2.91048e-34
Psme2b	2.64771e-10	-1.74141	0.107	0.275	3.59109e-06
Cpne8	6.34745e-08	-1.69533	0.121	0.264	0.000860904
Shisa5	5.79369e-25	-1.59071	0.269	0.625	7.85798e-21
Samhd1	2.74523e-16	-1.52493	0.217	0.473	3.72335e-12
Gsto1	3.75365e-10	-1.50038	0.142	0.32	5.09108e-06
Atp8b4	5.75299e-19	-1.43653	0.263	0.546	7.80278e-15
S100a6	2.43294e-15	-1.38987	0.572	0.739	3.29979e-11
Tesc	1.54265e-10	-1.32388	0.22	0.406	2.0923e-06
Itgb7	3.70376e-23	-1.30216	0.338	0.663	5.02341e-19
Lgals1	4.20659e-64	-1.259	0.96	0.995	5.7054e-60
Eif4ebp1	1.94427e-07	-1.25721	0.09	0.225	0.00263702
Bst2	2.23259e-15	-1.24478	0.324	0.573	3.02806e-11
Cd7	7.536e-09	-1.21092	0.142	0.313	0.000102211
Fam83a	6.96756e-09	-1.20305	0.179	0.351	9.4501e-05
Gm6213	2.67036e-07	-1.19765	0.15	0.292	0.00362181
Cxcr6	6.60457e-19	-1.17795	0.428	0.684	8.95778e-15
Klf2	2.37612e-17	-1.1613	0.301	0.596	3.22274e-13
Lmo4	9.35637e-10	-1.13106	0.353	0.522	1.269e-05
Trdv4	2.23342e-37	-1.09206	0.48	0.908	3.02918e-33
Gclm	2.63912e-79	-1.08659	1	1	3.57944e-75
Evl	2.50025e-16	-1.05089	0.364	0.623	3.39109e-12
Emp3	3.00474e-26	-0.956575	0.688	0.908	4.07533e-22
Nme4	6.46839e-08	-0.944206	0.272	0.428	0.000877308
Cenpw	2.63696e-13	-0.942295	0.315	0.58	3.5765e-09
Sdf2l1	1.09014e-15	-0.916939	0.52	0.755	1.47856e-11
Flna	6.22933e-19	-0.871524	0.5	0.777	8.44884e-15
Tagln2	8.4634e-21	-0.837188	0.754	0.905	1.14789e-16
Fkbp2	7.88746e-11	-0.825808	0.436	0.632	1.06978e-06
Hsp90b1	3.63513e-22	-0.799037	0.977	0.99	4.93032e-18
Ppa1	3.88246e-11	-0.767532	0.373	0.606	5.26578e-07
Calr	3.59337e-20	-0.765605	0.876	0.962	4.87369e-16
Nt5c	3.22915e-13	-0.761004	0.442	0.689	4.37969e-09
Pdia6	3.97985e-18	-0.740531	0.893	0.96	5.39787e-14
Nkg7	1.73157e-11	-0.729277	0.538	0.741	2.34852e-07
Ly6e	7.43864e-28	-0.726834	0.997	1	1.0089e-23
Tspo	4.76794e-19	-0.717424	0.847	0.946	6.46675e-15
Prr13	2.04053e-10	-0.703142	0.578	0.741	2.76757e-06
Gm10282	3.08294e-14	-0.696192	0.595	0.839	4.18139e-10
Phb	2.65576e-14	-0.689581	0.653	0.851	3.602e-10
Mrpl42	1.26146e-12	-0.668458	0.636	0.822	1.71091e-08
Pfdn6	2.83394e-12	-0.663269	0.595	0.8	3.84368e-08
Sptssa	1.15964e-12	-0.643764	0.642	0.829	1.57282e-08
Fam162a	1.27715e-09	-0.637376	0.54	0.718	1.7322e-05
Nhp2	2.16271e-13	-0.632922	0.699	0.879	2.93328e-09
Cenpx	8.07491e-12	-0.632136	0.618	0.82	1.0952e-07
Tmsb4x	6.42829e-46	-0.629583	1	1	8.71869e-42
Psme2	3.77548e-22	-0.626648	0.971	0.995	5.12069e-18
Hint1	1.97976e-28	-0.619696	0.997	1	2.68514e-24
Rasgrp2	1.8153e-08	-0.616036	0.549	0.732	0.000246209
Nop58	2.46274e-10	-0.610061	0.636	0.827	3.34022e-06
Hspa5	6.10144e-13	-0.609718	0.928	0.962	8.27539e-09
Mrto4	9.32825e-08	-0.604603	0.48	0.644	0.00126519
Atp5g1	2.04193e-22	-0.603908	0.991	0.995	2.76946e-18
Klk8	3.76404e-12	-0.600124	0.673	0.846	5.10516e-08
Cetn3	1.43024e-09	-0.595833	0.555	0.753	1.93983e-05
Prdx1	6.36703e-23	-0.586619	1	1	8.63561e-19
Fabp5	3.67308e-19	-0.579774	0.809	0.971	4.9818e-15
Pdia3	3.08582e-18	-0.578482	0.986	0.995	4.1853e-14
Chchd1	8.29167e-12	-0.574639	0.691	0.86	1.1246e-07
Bola3	1.61292e-07	-0.573613	0.529	0.698	0.0021876
Bag1	4.8242e-10	-0.572495	0.711	0.839	6.54306e-06
Cyba	2.08017e-21	-0.567739	0.968	0.991	2.82133e-17
Sec11c	6.26755e-09	-0.556022	0.763	0.857	8.50067e-05
Manf	1.34278e-10	-0.552539	0.968	0.981	1.82121e-06
Psma3	2.26368e-17	-0.548324	0.954	0.978	3.07023e-13
Psmb7	1.38592e-10	-0.544905	0.616	0.812	1.87972e-06
Cox7b	9.49387e-21	-0.542611	0.96	0.993	1.28765e-16
Psma1	1.17478e-11	-0.539996	0.754	0.879	1.59336e-07
Txn1	2.55153e-16	-0.535698	0.919	0.972	3.46065e-12
Uqcc2	3.00873e-11	-0.530227	0.789	0.902	4.08074e-07
Mif	1.30756e-23	-0.527495	1	0.998	1.77345e-19
Dctpp1	1.64432e-12	-0.527163	0.763	0.927	2.23019e-08
1810037I17Rik	2.45542e-09	-0.525491	0.662	0.851	3.33028e-05
Hprt	1.98518e-09	-0.523316	0.653	0.819	2.6925e-05
Cks1b	1.37853e-14	-0.521482	0.569	0.85	1.8697e-10
Cnn2	1.98221e-15	-0.520948	0.931	0.984	2.68847e-11
Tomm5	6.65261e-09	-0.52049	0.691	0.846	9.02294e-05
Rps27l	6.87346e-18	-0.52012	0.936	0.984	9.32248e-14
Gpx1	3.16817e-22	-0.513584	1	0.998	4.29699e-18
Pdlim1	1.88974e-07	-0.512794	0.572	0.729	0.00256306
Hspd1	1.38225e-09	-0.511838	0.847	0.94	1.87474e-05
Eny2	5.17362e-10	-0.503598	0.691	0.846	7.01699e-06
Abracl	2.66039e-14	-0.497599	0.884	0.965	3.60829e-10
Reep5	5.78556e-08	-0.496978	0.659	0.784	0.000784695
Snrpd1	1.34254e-15	-0.491593	0.974	0.991	1.82088e-11
Nucks1	1.31391e-08	-0.491414	0.514	0.713	0.000178205
Mrpl21	3.12426e-07	-0.488308	0.578	0.734	0.00423743
Cotl1	1.35472e-10	-0.485416	0.775	0.903	1.8374e-06
Gmnn	5.92655e-09	-0.482501	0.405	0.646	8.03818e-05
Psma2	2.07969e-19	-0.481495	0.974	0.997	2.82068e-15
C1qbp	5.52772e-11	-0.479882	0.824	0.936	7.49725e-07
Set	2.27619e-13	-0.473931	0.974	0.979	3.0872e-09
Sfr1	2.45977e-08	-0.473853	0.685	0.838	0.000333618
Mrps14	1.83168e-09	-0.472787	0.835	0.919	2.4843e-05
Banf1	7.86142e-15	-0.469344	0.98	0.991	1.06624e-10
Ptges3	2.41021e-08	-0.465907	0.743	0.889	0.000326897
Sh2d1a	4.1316e-09	-0.464046	0.691	0.832	5.60369e-05
Eef1d	1.52569e-17	-0.461391	0.994	1	2.06929e-13
Ssr4	7.6847e-15	-0.460708	0.98	0.979	1.04228e-10
Mrpl20	2.53557e-08	-0.451653	0.795	0.877	0.000343899
Uqcrb	5.40878e-15	-0.444052	0.974	0.988	7.33592e-11
D8Ertd738e	4.23585e-12	-0.438274	0.951	0.974	5.74508e-08
Npm1	1.39798e-24	-0.436992	1	1	1.89608e-20
Ndufa12	6.50485e-09	-0.435012	0.777	0.922	8.82253e-05
Nop10	1.14701e-14	-0.429655	0.986	0.997	1.55569e-10
Ostc	6.93002e-10	-0.429054	0.908	0.955	9.39919e-06
Ndufs6	9.84226e-08	-0.425371	0.711	0.872	0.00133491
Ran	2.17184e-15	-0.424404	0.997	1	2.94566e-11
Rps25	6.26092e-22	-0.423113	1	1	8.49168e-18
Magoh	3.00539e-09	-0.420586	0.775	0.917	4.07621e-05
Cenpa	4.15918e-08	-0.419955	0.318	0.532	0.00056411
Hist1h2ae	6.68985e-10	-0.418376	0.624	0.841	9.07344e-06
Lsm7	4.44191e-10	-0.418229	0.916	0.976	6.02456e-06
Ndufb6	6.10311e-10	-0.415008	0.867	0.955	8.27765e-06
S100a10	7.64866e-13	-0.41204	0.994	0.997	1.03739e-08
Rpl22l1	1.50305e-19	-0.404528	1	1	2.03859e-15
Canx	3.66569e-08	-0.404211	0.908	0.946	0.000497177
Cox5b	1.89097e-17	-0.403601	0.997	1	2.56472e-13
Myl6	9.79859e-23	-0.403548	1	1	1.32898e-18
Ldha	6.09171e-18	-0.403153	1	1	8.26219e-14
Hspe1	3.58113e-13	-0.402737	0.994	0.997	4.85709e-09
Cox6a1	2.7407e-14	-0.399276	0.988	0.998	3.71722e-10
Uqcr11	2.07135e-11	-0.398685	0.922	0.974	2.80937e-07
Anxa2	6.30519e-08	-0.398434	0.697	0.883	0.000855173
Ndufa13	6.8811e-17	-0.394397	0.991	0.998	9.33283e-13
Snrpf	7.33958e-14	-0.391541	0.994	0.997	9.95468e-10
Psmb5	4.76303e-13	-0.387605	0.977	0.998	6.4601e-09
Calm1	1.92098e-15	-0.38716	1	1	2.60542e-11
Rps2	4.49665e-31	-0.385621	1	1	6.09881e-27
Nedd8	1.49274e-11	-0.385004	0.98	0.993	2.0246e-07
Pa2g4	1.07228e-09	-0.383598	0.98	0.991	1.45433e-05
Mrps24	4.76737e-08	-0.380043	0.841	0.919	0.000646598
Hsp90aa1	1.87534e-09	-0.378378	0.988	0.993	2.54352e-05
Lsm4	3.59038e-10	-0.377343	0.962	0.988	4.86963e-06
Tyms	1.21161e-07	-0.376852	0.327	0.542	0.0016433
Cox7a2	2.47877e-14	-0.376346	1	0.998	3.36196e-10
Uqcr10	1.35285e-09	-0.375575	0.971	0.991	1.83487e-05
Snrpd3	2.95941e-10	-0.374313	0.962	0.978	4.01384e-06
Sdhb	2.84612e-07	-0.371812	0.882	0.964	0.0038602
Park7	1.49677e-13	-0.371574	0.997	0.998	2.03007e-09
Cox5a	9.6197e-18	-0.36966	0.997	1	1.30472e-13
Eif5a	2.59177e-16	-0.359418	1	1	3.51522e-12
Actg1	3.5687e-15	-0.356288	1	1	4.84022e-11
Ost4	4.05352e-09	-0.354601	0.957	0.979	5.49778e-05
Sec61b	1.65823e-16	-0.353799	1	1	2.24905e-12
Ndufb7	8.16477e-09	-0.353691	0.96	0.988	0.000110739
Ncl	1.63488e-09	-0.350717	0.991	1	2.21739e-05
Psmb3	3.41716e-12	-0.35063	0.997	0.998	4.6347e-08
Sf3b6	5.31908e-10	-0.349925	0.965	0.984	7.21426e-06
Tkt	6.4926e-08	-0.347251	0.945	0.99	0.000880591
Atp5g3	9.41453e-18	-0.346421	1	1	1.27689e-13
Dbi	3.08167e-09	-0.346114	0.951	0.995	4.17967e-05
Tomm20	1.08052e-09	-0.345542	0.968	0.993	1.46551e-05
H2afj	1.94246e-09	-0.344272	0.983	0.991	2.63456e-05
Sec61g	3.08219e-12	-0.341672	1	0.998	4.18037e-08
Ppia	2.82081e-21	-0.341508	1	1	3.82587e-17
Psmb2	1.0158e-08	-0.336859	0.974	0.991	0.000137773
Sh3bgrl3	1.91937e-18	-0.332526	1	1	2.60324e-14
Cox8a	6.98536e-17	-0.332199	1	1	9.47424e-13
Atp5j	1.1937e-12	-0.329255	1	1	1.61902e-08
Timm13	2.54858e-07	-0.328292	0.916	0.95	0.00345664
Elob	4.75642e-11	-0.327666	0.997	1	6.45113e-07
Psmb1	1.43741e-11	-0.324686	1	0.998	1.94957e-07
Atp5h	8.42014e-12	-0.323342	0.997	0.998	1.14202e-07
Snrpd2	3.38153e-08	-0.323026	0.974	0.986	0.000458637
Tmsb10	1.08164e-17	-0.321024	1	1	1.46703e-13
Ndufb8	1.15248e-07	-0.320308	0.954	0.984	0.0015631
Actb	4.0064e-23	-0.318888	1	1	5.43388e-19
Cd52	5.84031e-12	-0.314616	1	1	7.92121e-08
Atp5j2	4.98187e-15	-0.310119	1	1	6.75691e-11
Psma7	1.40667e-08	-0.310054	0.986	0.997	0.000190787
Myl12a	1.58411e-09	-0.308561	0.997	0.998	2.14853e-05
Psme1	9.13513e-09	-0.302354	0.983	0.997	0.0001239
Rbm3	7.09497e-14	-0.300069	1	1	9.6229e-10
Tma7	7.44905e-10	-0.297829	1	0.998	1.01031e-05
Tmem258	1.14646e-08	-0.295912	0.988	0.995	0.000155495
Pclaf	6.87785e-14	-0.294808	0.699	0.921	9.32843e-10
Arpc1b	1.04752e-08	-0.289421	0.991	0.995	0.000142075
Ndufa4	3.35831e-10	-0.284594	0.994	1	4.55488e-06
Rpl14	1.47785e-22	-0.284167	1	1	2.00441e-18
H2afz	2.05528e-09	-0.279467	1	1	2.78757e-05
Atp5l	4.45451e-11	-0.273621	0.997	1	6.04166e-07
Arhgdib	6.93744e-10	-0.272941	1	1	9.40925e-06
Atp5f1	4.55104e-10	-0.271348	0.997	0.998	6.17257e-06
Cox6c	6.84818e-11	-0.270641	1	1	9.28818e-07
Eif4a1	2.41669e-11	-0.26517	1	1	3.27776e-07
Tomm7	1.77822e-07	-0.26301	0.988	0.995	0.0024118
Gng5	7.12381e-13	-0.259847	1	1	9.66202e-09
Hmgn2	3.67396e-07	-0.258768	0.988	0.997	0.00498299
Cox7c	6.43751e-09	-0.251591	1	0.998	8.73119e-05
